# 1           **Three-dimensional structure of kinetochore-** 2           **fibers in human mitotic spindles**

3   Robert Kiewisz<sup>1,†1,†2</sup>, Gunar Fabig<sup>1</sup>, William Conway<sup>2</sup>, Daniel Baum<sup>3</sup>, Daniel Needleman<sup>2,4,5,6</sup>, and  
4   Thomas Müller-Reichert<sup>1</sup>

5  
6   <sup>1</sup>Experimental Center, Faculty of Medicine Carl Gustav Carus, Technische Universität Dresden, 01307  
7   Dresden, Germany

8   <sup>2</sup>Department of Physics, Harvard University, Cambridge, MA 02138, USA

9   <sup>3</sup>Department of Visual and Data-Centric Computing, Zuse Institute Berlin, 14195 Berlin, Germany

10   <sup>4</sup>Department of Molecular and Cellular Biology, Harvard University, Cambridge, MA 02138, USA

11   <sup>5</sup>John A. Paulson School of Engineering and Applied Sciences, Harvard University, Cambridge, MA  
12   02138, USA

13   <sup>6</sup>Center for Computational Biology, Flatiron Institute, New York, NY 10010, USA

14  
15   <sup>†1</sup>Current address: Biocomputing Unit, Centro Nacional de Biotecnología (CNB-CSIC), Darwin, 3, Campus  
16   Universidad Autónoma, 28049 Cantoblanco, Madrid, Spain

17   <sup>†2</sup>Current address: Simons Machine Learning Center, New York Structural Biology Center, New York, NY  
18   10027, USA

19  
20  
21  
22  
23   For correspondence:

24   T. Müller-Reichert

25   E-mail: [mueller-reichert@tu-dresden.de](mailto:mueller-reichert@tu-dresden.de)

26   Phone: +49 351 458 6442

27   R. Kiewisz

28   E-mail: [rkiewisz@nysbc.org](mailto:rkiewisz@nysbc.org)

## 29 **Abstract**

30 During cell division, kinetochore microtubules (KMTs) provide a physical linkage between the  
31 chromosomes and the rest of the spindle. KMTs in mammalian cells are organized into bundles, so-called  
32 kinetochore-fibers (k-fibers), but the ultrastructure of these fibers is currently not well characterized. Here  
33 we show by large-scale electron tomography that each k-fiber in HeLa cells in metaphase is composed of  
34 approximately nine KMTs, only half of which reach the spindle pole. Our comprehensive reconstructions  
35 allowed us to analyze the three-dimensional (3D) morphology of k-fibers and their surrounding MTs in  
36 detail. We found that k-fibers exhibit remarkable variation in circumference and KMT density along their  
37 length, with the pole-proximal side showing a broadening. Extending our structural analysis then to other  
38 MTs in the spindle, we further observed that the association of KMTs with non-KMTs predominantly  
39 occurs in the spindle pole regions. Our 3D reconstructions have implications for KMT growth and k-fiber  
40 self-organization models as covered in a parallel publication applying complementary live-cell imaging in  
41 combination with biophysical modeling (Conway et al., 2021). Finally, we also introduce a new  
42 visualization tool allowing an interactive display of our 3D spindle data that will serve as a resource for  
43 further structural studies on mitosis in human cells.

## 44 Introduction

45 Chromosome segregation during cell division is carried out by microtubule (MT)-based spindles (Anjur-  
46 Dietrich et al., 2021; McIntosh et al., 2013; Oriola et al., 2018; Prosser and Pelletier, 2017). While mitotic  
47 spindles can contain thousands of MTs, only a fraction of those highly dynamic filaments is associated  
48 with the kinetochores (Redemann et al., 2017). These MTs are called kinetochore microtubules (KMTs)  
49 and function to establish a physical connection between the chromosomes and the rest of the spindle  
50 (Flemming, 1879; Khodjakov et al., 1997; Maiato et al., 2004; Musacchio and Desai, 2017; Rieder, 1981;  
51 Rieder and Salmon, 1998).

52 The regulation of KMT dynamics in mitotic spindles has been studied in great detail in a number of  
53 different systems, including the early *Caenorhabditis elegans* embryo, *Xenopus* egg extracts and  
54 mammalian tissue culture cells (DeLuca et al., 2006; Dumont and Mitchison, 2009; Farhadifar et al.,  
55 2020; Inoué and Salmon, 1995; Kuhn and Dumont, 2019; Long et al., 2020). However, our understanding  
56 of the ultrastructure of KMTs in mammalian k-fibers is rather limited due to a low number of three-  
57 dimensional (3D) studies on spindle organization. Earlier studies applied several techniques. Some  
58 studies used serial thin-section transmission electron microscopy (TEM) (Khodjakov et al., 1997;  
59 McDonald et al., 1992; McEwen and Marko, 1998) and partial 3D reconstruction by electron tomography  
60 (O'Toole et al., 2020; Yu et al., 2019). Other studies used scanning electron microscopy to analyze the  
61 ultrastructure of mitotic spindles (Hoffman et al., 2020; Nixon et al., 2017, 2015). However, these prior  
62 studies did not present comprehensive 3D reconstructions of mammalian mitotic spindles. Nevertheless,  
63 by applying serial thin-section TEM it was reported that k-fibers in PtK<sub>1</sub> cells are composed of about 20  
64 KMTs (McDonald et al., 1992; McEwen et al., 1997). In contrast, tomographic analysis of RPE-1 cells  
65 revealed  $12.6 \pm 1.7$  KMTs per k-fiber (O'Toole et al., 2020). Moreover, different cell types can exhibit a  
66 wide range of chromosome sizes, which could be an important factor modulating the number of attached  
67 KMTs (Moens, 1979). This variation in the reported numbers of KMTs per k-fiber as well as a lack of  
68 complete 3D models of human mitotic spindles motivated us to perform an in-depth analysis of the k-fiber  
69 organization and KMT length distribution in the context of whole mitotic spindles in human tissue culture  
70 cells.

71 It was shown that mitotic KMTs exhibited various patterns of organization in different species. Single  
72 KMTs are connected to the kinetochores in budding yeast (Winey et al., 1995), while multiple KMTs are  
73 connected to dispersed kinetochores in nematodes (O'Toole et al., 2003; Redemann et al., 2017).  
74 Multiple KMTs connected to kinetochores are also observed in human cells. However, KMTs in these  
75 cells are organized into bundles, termed “kinetochore (k)-fibers”, which are attached to a single region on  
76 each chromosome (Begley et al., 2021; Godek et al., 2015; Inoué, 1953; Metzner, 1894; Mitchison and  
77 Kirschner, 1984; O'Toole et al., 2020; Schmidt, 1939).

78 Three different simplified models of k-fiber organization can be drawn. Firstly, a direct connection  
79 between kinetochores and spindle poles can be considered (**Figure 1A**), in which all KMTs in a given k-  
80 fiber have approximately the same length and are rigidly connected (Rieder, 1981; Ris and Witt, 1981).  
81 Secondly, an indirect connection may be considered (**Figure 1B**). In such a model, none of the KMT  
82 minus ends would be directly associated with the spindle poles, thus KMTs would show differences in  
83 their length and connect to the poles purely by interactions with non-KMTs in the spindle. Thirdly, the  
84 kinetochore-to-spindle pole connection may be neither direct nor indirect, thus showing a semi-direct  
85 pattern of connection, in which only some of the KMTs in a given k-fiber are associated with the spindle  
86 pole while others are not (**Figure 1C**). Previously, we have shown such a semi-direct pattern of KMT  
87 anchoring into the spindle network for the first embryonic mitosis in *C. elegans* (Redemann et al., 2017).  
88 Some KMTs in this nematode system are indeed directly associated with the spindle poles, while others  
89 are not. As far as the length of the KMTs in mammalian cells is concerned, a difference in their length had  
90 previously been reported for PtK<sub>1</sub> cells (McDonald et al., 1992). We, therefore, wondered how the  
91 anchoring of k-fibers into the spindle network is achieved in mammalian cells.

92 Here, we aimed to determine the number and length of KMTs and the positioning of their putative minus  
93 ends in human HeLa cells. We further aimed to analyze the organization of k-fibers and the interaction of  
94 KMTs with non-KMTs in whole mammalian spindles. Focusing on the metaphase stage, we applied  
95 serial-section electron tomography to produce large-scale reconstructions of entire mitotic spindles in  
96 HeLa cells. To achieve this, we developed software tools for a quantitative in-depth analysis of both  
97 KMTs and non-KMTs (<https://github.com/RRobert92/ASGA>). We found that k-fibers in HeLa cells display  
98 a previously unexpected variable morphology. The k-fibers indeed contain KMTs of different lengths (a  
99 semi-direct type of connection with the spindle pole) and show an uncoupling of KMT minus ends at the  
100 site of preferred interaction with the spindle poles. For better visualization of KMT organization and k-fiber  
101 morphology, we introduce here a new 3D visualization tool that allows the interested reader to  
102 interactively display the 3D data ([https://cfci.shinyapps.io/ASGA\\_3DViewer/](https://cfci.shinyapps.io/ASGA_3DViewer/)).



## 103 Results

### 104 K-fibers are composed of approximately nine KMTs

105 For our large-scale analysis of mammalian k-fibers, we acquired data on metaphase spindles in HeLa  
106 cells by serial-section electron tomography (**Figure 2A-B**). To visually inspect the quality of our samples,  
107 we extracted slices of regions of interest (**Figure 2-figure supplement 1**). We also used the tomogram  
108 data to reconstruct full spindles in 3D for quantitative analysis of the spindle morphology (**Figure 2-**  
109 **videos 1-3**). In preparation for this quantitative analysis, we applied a Z-factor to our 3D models to correct  
110 for a sample collapse that had occurred during the acquisition of the tomographic data (**Figure 2-figure**  
111 **supplement 2**). In our three full reconstructions, we segmented all MTs, the chromosomes and the  
112 spindle poles (including the centrioles). Each of these metaphase spindles was composed of  
113 approximately 6300 MTs ( $6278 \pm 1614$  MTs, mean  $\pm$  STD; **Figure. 2C-E; Table 1**) and had an average  
114 pole-to-pole distance of  $9.0 \pm 1.7$   $\mu\text{m}$  (mean  $\pm$  STD; **Figure 2-figure supplement 3A-B; Table 1**).

115 We then annotated the KMTs in our reconstructions based on the association of the putative MT plus  
116 ends with kinetochores. MTs that were arranged in parallel and made end-on contact at a single 'spot' on  
117 the chromosomes were defined as KMTs being part of the same k-fiber. For this publication, these  
118 bundled KMTs were considered the 'core' of the k-fibers. Possible interactions of these KMTs with other  
119 MTs (referred to here as non-KMTs) in the spindle were subject to subsequent steps of our in-depth  
120 spindle analysis. In our tomographic data sets, we identified between 90 and 110 k-fibers per cell, which  
121 included on average  $859 \pm 218$  KMTs (mean  $\pm$  STD;  $n = 3$ ; **Figure 2F-H; Figure 2-videos 4-6; Table 1**)  
122 in each spindle. Thus, only ~14% of all MTs in the reconstructed spindles were KMTs. The majority of  
123 annotated KMTs displayed open flared ends at the kinetochore (**Figure 2-figure supplement 4**),  
124 consistent with previous observations on the morphology of KMT plus ends in mammalian cells  
125 (**McIntosh et al., 2013**). We took advantage of these extracted k-fibers to further analyze the distance  
126 between the sister k-fiber ends in each data set. For this, we measured the median position of the KMT  
127 plus ends at each k-fiber and then determined the distance between the median of KMT plus-end  
128 positions of sister k-fibers (**Figure 2-figure supplement 3C-D; Table 1**). The average distance between  
129 the sister k-fiber ends was  $1.13 \pm 0.24$   $\mu\text{m}$  (mean  $\pm$  STD;  $n = 292$ ). The similarity in the median distance  
130 between sister k-fiber ends in the three reconstructions indicated to us that the selected pre-inspected  
131 spindles were indeed cryo-immobilized at a similar mitotic stage, thus allowing a further comparative  
132 quantitative analysis of our 3D models.

133 Next, we extracted individual k-fibers from our full 3D reconstructions to visualize their overall morphology  
134 (**Figure 3A; Figure 3-videos 1-6**). Our serial-section approach enabled us to follow each KMT in each k-  
135 fiber in 3D. This was achieved by semi-automatic stitching of the corresponding ends over section  
136 borders (**Figure 3-figure supplement 1; (Lindow et al., 2021)**). In addition to this semi-automatic  
137 stitching, each KMT in our reconstructions was manually checked for a proper end identification. The

138 individual k-fibers showed remarkable variability in their overall shape. Some k-fibers were rather straight,  
139 while others were very curved. At the kinetochores, k-fibers showed a compacted appearance, while k-  
140 fibers were considerably broader at their pole-proximal end. Interestingly, some KMT minus ends  
141 extended beyond the position of the centrioles (**Figure 3A - #I - #III**).

142 We further investigated the number of KMTs associated per kinetochore (**Figure 3B; Figure 3-figure**  
143 **supplement 2A; Table 2**) and found that the k-fibers were composed of around 9 KMTs ( $8.5 \pm 2.2$ , mean  
144  $\pm$  STD,  $n = 292$ ). To exclude the possibility that the average number of KMTs attached to kinetochores is  
145 influenced by a possible stretch of the sister kinetochores, we plotted both the number of attached KMTs  
146 and the difference ( $\Delta$ ) in the number of KMTs associated with the respective sister kinetochore against  
147 the distance between the kinetochore-proximal ends of k-fiber pairs. We did not observe a correlation  
148 between these parameters (**Figure 3C-D**; Pearson's correlation coefficients were 0.04 and 0.29) and  
149 concluded that the number of KMT attachments to kinetochores in metaphase is not influenced by a  
150 variation in the inter-kinetochore distance. Another variable with a possible influence on the number of  
151 attached KMTs to the outer kinetochores could be the position of the k-fibers within the metaphase  
152 spindle. Because spindles show a rounded appearance at metaphase, a difference in the number of  
153 attached MTs to the outer kinetochores could be influenced by the overall spindle shape. To analyze such  
154 a possible positional effect, we considered the cross-section of the metaphase plate as an ellipse and  
155 defined a central, an intermediate and a peripheral zone on this ellipse (**Figure 3-figure supplement 3A**).  
156 By determining the position of the kinetochores on the 3D-reconstructed metaphase plate, we then  
157 annotated each k-fiber in our three data sets to one of these regions (**Figure 3-figure supplement 3B-**  
158 **M**). Keeping the roundedness of spindles at metaphase in mind, we indeed observed that k-fibers  
159 positioned in the center are rather straight, while peripheral k-fibers are more curved. However, we did  
160 not find a difference in the number of attached KMTs for these three different regions (**Figure 3-figure**  
161 **supplement 3N; Table 4**) and concluded that also the position of the k-fibers within the spindle has no  
162 effect on the average number of KMTs per k-fiber.

163 We were also interested in measuring the density and spacing of KMTs at the kinetochore, thus allowing  
164 subsequent analysis of KMT density along the k-fiber length. Because kinetochores show relatively lower  
165 contrast in high-pressure frozen material compared to conventionally prepared samples (McEwen et al.,  
166 1998b), we indirectly measured the size of the kinetochores in our spindles by determining the cross-  
167 sectional area of the k-fibers (i.e., by encircling the KMTs) close to the outer kinetochore plate. The  
168 measured average kinetochore area was  $0.10 \pm 0.07 \mu\text{m}^2$  (mean  $\pm$  STD; **Figure 3-figure supplement**  
169 **2B-C**). We then analyzed the density of KMTs at the outer kinetochores by counting the number of KMTs  
170 within the determined areas, which was  $112 \pm 60 \text{ KMTs}/\mu\text{m}^2$  (mean  $\pm$  STD,  $n = 292$ ; **Figure 3-figure**  
171 **supplement 2D; Table 2**). In addition, we observed an average center-to-center distance between  
172 neighboring KMTs of  $74 \pm 22 \text{ nm}$  (mean  $\pm$  STD,  $n = 292$ ; **Figure 3-figure supplement 2E; Table 3**).  
173 Considering an MT diameter of 25 nm, this corresponds to an average wall-to-wall spacing of about 50

174 nm between the KMTs at the outer kinetochore. Thus, following our initial visual inspection of k-fibers, the  
175 KMTs tend to be highly compacted at the outer kinetochore.

176 We measured the length of the KMTs in our reconstructed k-fibers and observed a broad distribution of  
177 KMT lengths with an average value of  $3.87 \pm 1.98 \mu\text{m}$  (mean  $\pm$  STD;  $n = 2580$ ; **Figure 4A**; **Figure 4-**  
178 **figure supplement 1A**; **Table 2**). Our analysis revealed the existence of relatively short KMTs in central,  
179 intermediate and peripheral k-fibers that were not associated with the spindle poles (**Figure 4-figure**  
180 **supplement 2-3**; **Table 4**). Indeed, about  $20 \pm 4\%$  of the KMTs had lengths less than  $2 \mu\text{m}$ . Our analysis  
181 also showed relatively long KMTs (about  $39 \pm 10\%$ ) that were longer than the half spindle length. Some of  
182 these long KMTs showed a pronounced curvature at their pole proximal end, thus connecting to the 'back  
183 side' of the spindle poles (see also **Figure 3A** - k-fiber #I - #III; **Figure 3-videos 1-3**).

184 We continued our study by further analyzing the pole proximal ends (from now on called minus ends). As  
185 a first step, we annotated each KMT minus end in our spindle reconstructions. The development of  
186 appropriate software allowed us then to determine both the distance of the KMT minus ends to the  
187 nearest spindle pole and the relative position of the KMT minus ends along the pole-to-kinetochore axis  
188 (**Figure 5A**; (Kiewisz and Müller-Reichert, 2021)). In addition, we were also interested in the percentage  
189 of the KMT minus ends that were directly associated with the spindle poles. Similar to our previously  
190 published analysis of spindle morphology in the early *C. elegans* embryo (Redemann et al., 2017), we  
191 defined an MT-centrosome interaction area. For this, we plotted the distribution of all non-KMT minus-end  
192 distances to the nearest spindle pole. The distribution peaked  $\sim 1 \mu\text{m}$  from the pole and then fell before  
193 plateauing in the spindle bulk. To find the edge of the MT-centrosome interaction area, we fit a Gaussian  
194 to the distribution peak and defined the cutoff distance for the edge of the MT-centrosome interaction  
195 area as two fit half-widths from the center of the fit peak,  $1.7 \mu\text{m}$  from the mother centriole. (**Figure 5B**,  
196 gray area). In other words, KMTs with their minus ends positioned at  $1.7 \mu\text{m}$  or less to the center of the  
197 nearest mother centriole (i.e., inside this MT-centrosome interaction zone) were defined to be directly  
198 associated with a pole, while KMT minus ends positioned farther than this cut-off distance of  $1.7 \mu\text{m}$  were  
199 called indirectly associated with the spindle pole. We then measured the distance of each KMT minus-  
200 end to the nearest mother centriole (**Figure 5C**; **Figure 5-figure supplement 2A**). Taking our determined  
201 cut-off value into account, we found that only  $49\% (\pm 15.5\%; \pm \text{STD}, n = 3)$  of the KMT minus ends were  
202 positioned within the defined MT-centrosome interaction area. This is in accord with our observation that  
203 the average number of KMTs per k-fiber at the spindle pole ( $4.1 \pm 2.0$ ; **Figure 5-figure supplement 3**;  
204 **Table 2**) was lower compared to the average number of KMTs per k-fiber at the kinetochore ( $8.5 \pm 2.2$ ;  
205 **Figure 3B**). All in all, this suggested to us that only half of the KMTs in HeLa cells are directly connected  
206 to the spindle pole, while the other half of the KMTs are indirectly connected.

207 Interestingly, we also observed that the number of KMT minus ends associated with the spindle poles  
208 was significantly higher in k-fibers positioned in the center compared to those at the periphery of the  
209 mitotic spindle. In addition, the average length of KMTs in central k-fibers and their minus-end distance to

210 the spindle pole were significantly lower compared to those observed in peripherally positioned k-fibers  
211 (**Figure 5-figure supplement 4; Table 4**). This suggested to us that the position of the k-fibers within the  
212 spindle affects the ultrastructure of the individual KMTs.

213 We next investigated the relative position of the KMT minus ends on the pole-to-kinetochore axis (**Figure**  
214 **5D; Figure 5-figure supplement 1; Figure 5-figure supplement 2B; Table 2**). We found that the KMT  
215 minus ends that were positioned within the MT-centrosome interaction zone showed a peak position  
216 close to the center of the spindle poles. In contrast, KMT minus ends outside this interaction area did not  
217 show a preferred position but rather displayed a flat relative distribution on the pole-to-kinetochore axis.  
218 This analysis confirmed our initial visual 3D inspection of the KMTs, revealing that the k-fibers in HeLa  
219 cells are not composed of compact bundles of KMTs of the same length but rather show KMTs of  
220 different lengths, thus confirming previously published data (McDonald et al., 1992; O'Toole et al., 2020).

221 For comparison, we also analyzed the length distribution of non-KMTs in the spindles. Non-KMTs had an  
222 average length of  $2.0 \pm 1.7 \mu\text{m}$  (mean  $\pm$  STD;  $n = 9957$ ; **Figure 4B; Figure 4-figure supplement 1B**)  
223 showing a high number of very short ( $< 2 \mu\text{m}$ ) and a low number of long MTs ( $>$  half spindle length). In  
224 addition,  $38 \pm 9\%$  of the non-KMT minus ends were localized in the defined MT-centrosome interaction  
225 zone and the remaining  $\sim 60\%$  were located in the bulk of the spindle (**Figure 5F; Figure 2-figure**  
226 **supplement 2C; Table 2**). In addition, the distribution plot of the relative position of the non-KMT minus  
227 ends on the pole-to-pole axis showed two peaks at the spindle poles (**Figure 5G; Figure 5-figure**  
228 **supplement 2D**). Overall, this indicated to us that the non-KMTs show a very high number of very short  
229 MTs that is different from the flatter length distribution of KMTs.

### 230 **K-fibers are broadened at spindle poles**

231 Previous light microscopic observations have indicated that metaphase spindles show an internal twist  
232 (Novak et al., 2018; Taubenberger et al., 2020), which might possibly be a consequence of motor protein-  
233 related forces acting within the spindle. We wondered whether k-fibers show a characteristic curvature of  
234 MTs also in our data. Therefore, we were interested in whether such a twist can also be observed when  
235 analyzing 3D reconstructions of whole spindles by stitching serial sections for electron tomography. As a  
236 measure, we decided to analyze the tortuosity of individual KMTs in our 3D models. Tortuosity is the ratio  
237 of the total length of a curve (the spline length of a given KMT) to the distance between its ends. Straight  
238 KMTs, therefore, have a tortuosity of 1, while a quarter circle has a tortuosity of around  $\sim 1.1$  and a half-  
239 circle of around  $\sim 1.6$  (**Figure 6A**). Because the tortuosity of KMTs might not be homogeneous throughout  
240 the spindle, we aimed to measure both their global and local tortuosity in our 3D reconstructions, i.e., the  
241 tortuosity of the KMTs along their entire length and also in defined sections of a length of 500 nm along  
242 the k-fibers, respectively (**Figure 6B-C**).

243 Firstly, we analyzed the global tortuosity of the KMTs. For this, we applied a color code to our 3D models  
244 to visualize differences in the curvature of individual KMTs (**Figure 6D; Figure 6-movies 1-3**). For all data

245 sets, we observed an average value of KMT tortuosity of  $1.1 \pm 0.1$  (mean  $\pm$  STD,  $n = 2580$ ). We found  
246 that  $62\% \pm 8\%$  of the KMTs showed a tortuosity of lower than 1.1 and  $38 \pm 10\%$  of the KMTs displayed a  
247 tortuosity higher than 1.1 (**Figure 6E**; **Table 3**). We also observed that straight KMTs (tortuosity  $\leq 1.1$ )  
248 were predominantly located in the center of the spindle, while curved KMTs (tortuosity  $> 1.1$ ) were located  
249 more at peripheral spindle positions (**Figure 6F**; **Figure 6-figure supplement 1**, **Table 4**). Furthermore,  
250 the global tortuosity of KMTs was correlated with their length. As expected, short KMTs were straighter,  
251 while long KMTs were more curved ( $R = 0.68$ ;  $p = 2.2e-16$ ; **Figure. 6G**). In addition,  $75 \pm 6\%$  of the KMTs  
252 with a tortuosity higher than 1.1 were longer than the half-spindle length. Secondly, we also investigated  
253 the local tortuosity of the KMTs. For each KMT, we applied the same color code as used for the analysis  
254 of global tortuosity (**Figure 6H**). Then we plotted the tortuosity value for each 500 nm segment against  
255 the position on the pole-to-kinetochore axis (**Figure 5-figure supplement 1**). Our analysis revealed that  
256 the tortuosity of KMTs was not uniform along the pole-to-kinetochore axis. Importantly, the local tortuosity  
257 of the KMTs was weakly correlated with the relative position of the KMT segments on the pole-to-  
258 kinetochore axis, meaning that the local tortuosity slowly increased constantly from the kinetochores  
259 towards the spindle poles ( $R = -0.13$ ;  $p = 2.2e-16$ ; **Figure 6I**). Extending previously published knowledge,  
260 we showed that KMTs have a higher tortuosity at the spindle poles compared to the kinetochores.

261 Next, we also asked whether an increased KMT tortuosity at the spindle poles is reflected in the  
262 compactness of the k-fibers along their k-fiber length. For this, we analyzed cross-sections of k-fibers to  
263 determine their polygonal areas (**Figure 7A**; **Figure 7-figure supplement 1**). In the interest of precision,  
264 we considered such a polygonal analysis superior to an analysis of fitting circles to determine cross-  
265 sectional areas. Cross-sections of k-fibers showed an average polygonal area of  $0.097 \pm 0.161 \mu\text{m}^2$  ( $\pm$   
266 STD,  $n = 292$ ). We then continued by plotting the values for these polygonal areas against the relative  
267 position on the pole-to-kinetochore axis (**Figure 7B**; **Table 3**). We measured an average polygonal area  
268 of  $0.034 \pm 0.019 \mu\text{m}^2$  at the kinetochores,  $0.149 \pm 0.210 \mu\text{m}^2$  in the middle of the spindles, and  $0.092 \pm$   
269  $0.146 \mu\text{m}^2$  at the spindle poles. Compared to the position at the kinetochore, the average polygonal area  
270 of the k-fibers was about 4-fold higher in the middle of the spindles and roughly 3-fold higher at the  
271 spindle poles. Moreover, the cross-section polygonal area of the k-fibers showed a higher spread of  
272 values at the spindle poles compared to the kinetochores, thus reflecting the observed broadened  
273 appearance of the k-fibers at the spindle poles.

274 To further characterize the arrangement of the KMTs in the k-fibers, we also set out to measure the  
275 number of the KMTs along the length of the k-fibers (**Figure 7C**). For each k-fiber, we defined a circle  
276 enclosing all KMTs at the kinetochore. We then measured the number of KMTs that were included in this  
277 defined k-fiber circle and plotted the percentage of the enclosed KMTs against the relative position along  
278 the pole-to-kinetochore axis. We observed a variation in the percentage of enclosed KMTs along the k-  
279 fiber length. As defined, the highest percentage of enclosed KMTs was observed at the outer kinetochore.  
280 However, at the spindle poles, roughly only 64% of the KMTs were enclosed (**Table 3**). Thus, the density  
281 of KMTs in the k-fibers at the spindle poles was decreased compared to the one observed at the outer



282 kinetochore (**Figure 7D**). From all these analyses we concluded that k-fibers display a higher tortuosity  
283 and a lower KMT density close to the spindle poles compared to the position at the kinetochores, thus  
284 leading to a broadened appearance of the pole-proximal ends.

## 285 **KMTs primarily associate with non-KMTs at spindle poles**

286 So far, we had concentrated only on an analysis of KMT morphology and considered these bundled MTs  
287 as the 'core structure' of the k-fibers. Likely, the observed organization of KMTs in k-fibers is the result of  
288 KMTs interacting with other non-KMTs in the spindle, thus contributing to the maturing of k-fibers  
289 (Almeida et al., 2021). Therefore, we also aimed to investigate patterns of association of KMTs with the  
290 neighboring non-KMTs in our 3D reconstructions. Moreover, we were particularly interested in localizing  
291 such KMT/non-KMT associations in the spindles to map the detected positions of MT-MT interaction on  
292 the pole-to-kinetochore axis. In general, we considered two types of interactions between MTs. Firstly, we  
293 analyzed potential interactions between MT ends with neighboring MT lattices, which could be mediated  
294 by MT minus-end associated molecular motors such as dynein (Tan et al., 2018) or kinesin-14 (Molodtsov  
295 et al., 2016), by other MT-associated proteins such as HDAC6 (Ustinova et al., 2020), Tau (Bougé and  
296 Parmentier, 2016) or by  $\alpha$ -tubulin (Rosselló et al., 2018). Secondly, we considered MT-MT lattice  
297 interactions, which might be established by molecular motors such as kinesin-5 (Falnikar et al., 2011) or  
298 PRC1 (Mollinari et al., 2002). Both types of interactions are also displayed here by using our new 3D  
299 visualization tool. The aim of applying this tool is to enable an illustration of the 3D complexity of such  
300 KMT/non-KMT interactions.

301 We started our analysis by investigating possible KMT minus-end associations with either KMT or non-  
302 KMT lattices. For this, we annotated all KMT minus ends in our 3D reconstructions and measured the  
303 distance of each minus end to a neighboring MT lattice (**Figure 8A**). We then determined association  
304 distances (i.e., 25, 30, 35, 45, 50, 75 and 100 nm) to quantify the number of associations occurring within  
305 these given interaction distances (Kellogg et al., 2016; Redwine et al., 2012). From this, we further  
306 determined the percentage of all KMT minus ends that were associated with non-KMT lattices according  
307 to selected association distances (**Figure 8B; Table 5 and Table 6**). As expected, we observed that the  
308 number of KMT minus ends associated with adjacent MT lattices increased with an increase in the  
309 association distance. Considering 35 nm as an example of a possible interaction distance between two  
310 MTs connected by a single dynein motor (Amos, 1989), we observed that only  $32.6 \pm 5.5\%$  of all KMT  
311 minus ends were associated with other MTs (for a visualization of the pattern of association see **Figure**  
312 **8C; Figure 8-figure supplement 1; Figure 8-video 1**). Moreover, of all KMT minus ends that were not  
313 associated with the spindle poles (i.e., those positioned farther than  $1.7 \mu\text{m}$  away from the centrioles) only  
314  $32.8 \pm 24.9\%$  showed an association with other MT lattices at a given distance of 35 nm (**Figure 8D-E**).  
315 This suggested that for this given distance of association roughly only 30% of the KMT minus ends in k-  
316 fibers were associated with the MT network. Further considering larger distances of association between  
317 KMT minus end and neighboring MT lattices (**Figure 8B and Figure 8D**), we also observed that not all

318 KMT minus ends were associated with neighboring MTs even at a value of 100 nm (**Table 5** and **Table**  
319 **6**).

320 Next, we sought to map the positions of the detected associations of KMT minus ends with either KMT or  
321 non-KMT lattices within the reconstructed spindles. We then determined the position of such associations  
322 in our spindles and plotted the data against the relative position on the pole-to-kinetochore axis. For this,  
323 we normalized the pole-to-kinetochore axis against the MT density at each given position. We first plotted  
324 the number of KMT minus-end associations with KMT lattices against the relative position on the pole-to-  
325 kinetochore axis (**Figure 8F**; **Figure 8-figure supplement 2A**). Associations of KMT minus ends with  
326 KMT lattices. KMT minus ends were distributed along the pole-to-kinetochore axis with a preference for  
327 positions at the spindle poles. As an example, for a given association distance of 35 nm,  $60.7 \pm 9.4\%$  of  
328 the total number of associations were observed at the spindle poles. We then also determined the relative  
329 position of the KMT minus-end associations with non-KMT lattices (**Figure 8G**; **Figure 8-figure**  
330 **supplement 2E**). Similarly, the majority of the associations of KMT minus ends with non-KMT lattices  
331 were observed at the spindle poles. For the chosen distance of 35 nm,  $44.7 \pm 5.2\%$  of these associations  
332 were observed at the spindle poles. Thus, the spindle poles appeared as the major sites for interaction of  
333 KMT minus ends with neighboring MT lattices.

334 *Vice versa*, we also determined the occurrence of either KMT or non-KMT minus ends in the vicinity of  
335 KMT lattices (**Figure 8-figure supplement 2** and **3**; **Figure 8-video 2**). At 35 nm or closer to the KMT  
336 lattice, we observed that on average  $42 \pm 8\%$  of KMTs associated with either KMT or non-KMT minus  
337 ends, with the majority of associations with non-KMT minus ends (**Table 7** and **Table 8**). Moreover, we  
338 also determined the relative position of these associations on the spindle axis. Again, the majority of KMT  
339 lattices ( $59.8 \pm 6.7\%$ ) associated with other MT minus ends were preferentially found at spindle poles  
340 (**Figure 8-figure supplement 2C-D**). In contrast, only  $39.1 \pm 4.6\%$  of non-KMTs associated with other MT  
341 minus ends were found at the poles (**Figure 8-figure supplement 2G-H**). Again, this analysis indicated  
342 that the interaction of KMTs with other MTs preferentially takes place at the spindle poles regardless of  
343 the association distance.

344 In parallel to an analysis of the position of possible MT-MT associations on the pole-to-kinetochore axis,  
345 we were also interested in studying the length and number of these associations in the spindles on each  
346 MT, as such information would also help to recognize specific patterns of MT-MT interaction. For a pairing  
347 length analysis as previously applied (McDonald et al., 1992; Winey et al., 1995), we defined 20 nm as a  
348 minimal length of interaction. For each MT, we also counted the number of continuous interaction  
349 segments over which they retained this minimal association proximity (**Figure 9A**). In addition, we also  
350 varied the distance between associated MTs by choosing values of 25, 30, 35, 45 and 50 nm. As  
351 expected, the peaks in the number of KMTs changed rapidly with an increase in the number and length of  
352 associations (**Table 8** and **Table 9**). We then analyzed the association of KMTs with other MTs in the  
353 spindle by plotting the number of associations against the relative position on the pole-to-pole axis. With

354 an increase in the considered association distance between MTs, we observed an increase in the number  
355 of associations at the spindle poles and a drastic decline in the number of these associations at positions  
356 in the middle of the spindle (**Figure 9B-C; Figure 9-video 1**). We then also analyzed the association of  
357 non-KMTs with other MTs. In contrast to the previous analysis, by increasing the association distances  
358 we detected a considerable increase in the number of interactions near the spindle midplane. (**Figure 9D-**  
359 **E; Figure 9-video 2**). This peak is of functional importance, most likely representing the region, where  
360 kinesin motors generate pushing forces (**Shimamoto et al., 2015**). We concluded from all these analyses  
361 that KMTs and non-KMTs differ in their spatial pattern of MT-MT association. KMTs strongly interact with  
362 neighboring MTs at the spindle poles, while non-KMTs show a broad region of MT-MT interaction within  
363 the middle of the spindle potentially forming interpolar bundles (McDonald et al., 1992).

364 Finally, we were interested in how the distribution patterns of MT-MT interactions change in relation to the  
365 position in the spindle. With our high-resolution 3D data sets covering all MTs in the spindle, we decided  
366 to investigate the number and the length of associations for both KMTs and non-KMTs as a function of  
367 the distance between MTs. Firstly, we plotted the distribution of the number of associations and also of  
368 the length of associations (**Figure 9-figure supplement 2**). As expected, with an increase in the  
369 considered distance between MTs, KMTs showed an increase in the number and also in the average  
370 length of interactions (**Table 9** and **Table 10**). For a given MT-MT distance of 35 nm, the number of KMT  
371 associations was  $10.6 \pm 3.2$  (mean  $\pm$  STD,  $n = 2580$ ) with an average MT length of association of  $145 \pm$   
372  $186$  nm ( $\pm$ STD,  $n = 2580$ ). Secondly, we also analyzed the association of non-KMTs with any MT in the  
373 spindle. Non-KMTs showed a similar pattern of increase in the number and length of associations with  
374 increasing distances between individual MTs. For 35 nm, the number of associations was  $7.4 \pm 3.1$  (mean  
375  $\pm$  STD,  $n = 9957$ ) with an average length of association of  $103 \pm 118$  nm (mean  $\pm$  STD,  $n = 9957$ ). With  
376 an increase in the distance between MTs, we observed that KMTs tend to show a higher number of  
377 associations and a higher average length of associations compared to non-KMTs. Importantly, these  
378 results were consistent for all selected association distances.



## 379 Discussion

380 The ultrastructure of KMTs in human k-fibers was insufficiently described prior to this study on the 3D  
381 organization of metaphase spindles. Large-scale reconstruction by serial-electron tomography (Fabig et  
382 al., 2020; Redemann et al., 2018, 2017) allowed us to quantitatively analyze KMT organization both in  
383 individual k-fibers and in the context of whole spindles.

### 384 Methodological considerations

385 For generating 3D reconstructions of spindles, we applied electron microscopy of plastic sections. The  
386 use of plastic sections suffers from the fact that samples undergo a collapse in the electron beam during  
387 imaging, and this is obvious by a reduction in the section thickness (Luther et al., 1988; McEwen and  
388 Marko, 1998; O'Toole et al., 2020). By expanding the complete stack of serial tomograms (**Figure 2-**  
389 **figure supplement 2**), it is possible to correct this loss in Z, and we did so for our three data sets  
390 covering whole metaphase spindles in HeLa cells.

391 Here, we used serial, semi-thick sections of plastic-embedded material for a 3D tomographic  
392 reconstruction of whole spindles. Although serial sectioning is never perfect, in that the section thickness  
393 within ribbons always shows some variability, we were able to produce data sets of remarkable similarity.  
394 This is true for our analysis of MT length distribution (**Figure 4; Figure 4-figure supplement 1**) and our  
395 measurements of minus-end distance to the spindle poles and minus-end positioning (**Figure 5; Figure**  
396 **5-figure supplement 2**). In combination with a semi-automatic segmentation and stitching of MTs  
397 (Lindow et al., 2021; Weber et al., 2012), our approach enabled us to reliably model individual MTs  
398 overall section borders, thus allowing a quantitative study of MT length and end-positioning in whole  
399 spindles. In the future, we will use this routine approach to quantify MT organization also in other  
400 mammalian systems, such as RPE-1 and U2OS cells.

401 In electron microscopic images, centrosomes or spindle poles are visible by pairs of centrioles  
402 surrounded by electron-dense pericentriolar material (PCM). Since these membrane-less organelles do  
403 not show a clear boundary in thin sections or in electron tomograms, it is not immediately obvious how to  
404 define the edge of the spindle pole. Inspired by earlier studies in the early *C. elegans* embryo (O'Toole et  
405 al., 2003; Redemann et al., 2017; Weber et al., 2012), we determined the edge of the spindle pole from  
406 the density distribution of non-KMT minus ends in the spindle. The non-KMT minus-end density peaked a  
407 micron away from the pole and then fell before leveling off at constant non-KMT minus-end density in the  
408 spindle bulk. We defined the edge of the spindle pole as two fit-half widths from the center of the non-  
409 KMT minus-end density peak. In the HeLa spindles, this was 1.7  $\mu\text{m}$  from the mother centriole. We  
410 applied the same cutoff in a parallel study on the dynamics of mammalian k-fibers (see **Figure 1** in  
411 (Conway et al., 2021)).

412 In this parallel study, we supplemented our electron tomography data on the KMT length distribution with  
413 light microscopic data. Essentially, our 3D reconstructions show a distribution of KMT length in

414 metaphase that is strikingly similar to the distribution plot of KMT length as obtained by biophysical  
415 modeling in combination with light microscopy (see **Figure 8B-D** in (Conway et al., 2021)). All this shows  
416 that light and electron microscopy produce truly complementary data, although completely different  
417 methods of sample preparation and data analysis need to be applied.

## 418 **KMT organization**

419 Counting the total number of KMTs and non-KMTs in our spindles, we show that only ~14% of all MTs in  
420 the reconstructed spindles were KMTs. However, this percentage in the total number of all MTs  
421 corresponds to ~25% of the tubulin mass as measured in parallel by light microscopy (Conway et al.,  
422 2021). Comparing the average length of KMTs and non-KMTs, we also find that KMTs are on average  
423 twice as long as non-KMT. Thus, a higher value in the average length of KMTs *versus* non-KMTs  
424 contributes to a higher percentage in the tubulin mass of KMTs compared to all other MTs in the spindle.

425 The length distribution of KMTs in HeLa cells shows striking similarities to the distribution of KMTs  
426 observed in the early *C. elegans* embryo (Redemann et al., 2017). Both human KMTs attached to  
427 monocentric kinetochores and also nematode KMTs associated with dispersed holocentric kinetochores  
428 show a rather flat length distribution and a rather low number of both very short and very long KMTs. In  
429 contrast, non-KMTs in both systems show an exponential length distribution with a very high occurrence  
430 of very short MTs (around 57% of the non-KMTs and ~21% of KMT in HeLa cells were less than 2  $\mu\text{m}$ ).  
431 Exponential length distributions as found for non-KMTs are typical of dynamic instability kinetics (Burbank  
432 et al., 2007; Loiodice et al., 2019). Uniform length distribution of KMTs, however, indicates a difference in  
433 dynamics and possibly higher stability of the plus-ends against MT depolymerization. Taken together, all  
434 this argues that KMTs in both spindles have distinct properties different from those of non-KMTs.

435 A difference in the properties between KMTs and non-KMTs is also obvious after a cold treatment of  
436 cells. Such treated cells show cold-stable k-fibers, while most of the non-KMTs undergo depolymerization  
437 upon exposure to cold (Maiato et al., 2004). Here we can only speculate about this resistance to cold  
438 temperature. Likely, KMTs are stabilized by association with the kinetochore (Brinkley and Cartwright,  
439 1975; DeLuca et al., 2006; Warren et al., 2020) and/or by KMT-KMT/KMT-non-KMT interactions. The  
440 latter are possibly mediated by several MT-associated proteins (Agarwal, 2018). It is also possible that  
441 non-KMTs, involved in a k-fiber maturation during mitosis (Maiato et al., 2004), contribute to such  
442 stabilization of k-fibers in mammalian cells.

443 Electron tomography revealed that on average nine KMTs are attached to each kinetochore in HeLa cells  
444 in metaphase. This result differs from previous observations in PtK<sub>1</sub> cells (McEwen et al., 1997; O'Toole  
445 et al., 2020). In this marsupial cell line, about 20 KMTs were reported to connect to the kinetochores. This  
446 difference in the number of attached KMTs could be related to kinetochore size. As previously observed  
447 by light microscopy, kinetochores in HeLa cells have about half the size of kinetochores compared to PtK<sub>1</sub>  
448 cells (Cherry et al., 1989). Similarly, kinetochore size in PtK<sub>1</sub> cells was  $0.157 \pm 0.045 \mu\text{m}^2$  (mean  $\pm$  STD;

449 (McEwen et al., 1998a)) as observed by electron tomography, whereas kinetochores in HeLa cells, as  
450 determined indirectly by electron tomography in this study, have an estimated size of about  $0.107 \pm 0.075$   
451  $\mu\text{m}^2$  (mean  $\pm$  STD). Possibly, the area of the outer kinetochore might indirectly define the size and/or the  
452 number of available free binding sites for MTs (Drpic et al., 2018; Monda and Cheeseman, 2018).  
453 Concerning the number of kinetochore-attached MTs, it is interesting to note here that the number of  
454 KMTs per k-fiber is not related to the position of these KMTs in the spindles. In fact, central, intermediate  
455 and peripheral kinetochores show similar average numbers of attached KMTs. Thus, the peripheral  
456 position of k-fibers within the spindle accompanied by an increase in the global tortuosity has no effect on  
457 the number of KMTs in the k-fibers.

458 KMTs in our reconstructed k-fibers are of different lengths, confirming previous observations (McDonald  
459 et al., 1992; O'Toole et al., 2020; Sikirzhytski et al., 2014). In fact, many KMTs are relatively short (~20%  
460 of KMTs were shorter than 2  $\mu\text{m}$ ; **Figure 4A**), and half of the KMT minus ends are not positioned in the  
461 defined MT-centrosome interaction area. Per definition, these short KMTs in k-fibers are not directly  
462 associated with the spindle poles. Interestingly, only 5% of the analyzed k-fibers show a length  
463 distribution in which none of the analyzed KMTs is positioned in the MT-centrosome interaction area  
464 (**Figure 5-figure supplement 3**). When analyzing KMTs in the one-cell *C. elegans* embryo, we found that  
465 only about 20 % of the KMT minus ends were located within 2  $\mu\text{m}$  of their corresponding mother centriole.  
466 This had suggested that the majority of KMTs in *C. elegans* do not contact the centrosomes. In  
467 agreement with previously published data (McDonald et al., 1992; O'Toole et al., 2020), our tomographic  
468 analysis of mammalian KMTs thus suggests that the k-fibers in HeLa cells mediate a semi-direct  
469 connection with the spindle poles, in which at least one KMT of the k-fibers is directly connected to the  
470 poles, while the other KMTs of the fiber are indirectly linked to non-KMTs (**Figure 10**). Thus, spindles in  
471 nematode embryos and in mammalian cells are similar in that anchoring of KMTs into the spindle network  
472 can be observed.

473 Interestingly, we observed a difference in KMT length and their minus-end distance to the pole in central  
474 *versus* peripheral KMTs. Centrally located KMTs were shorter, and their minus ends showed a shorter  
475 distance to the mother centriole compared to peripheral KMTs. This difference is most likely related to the  
476 roundedness of the mitotic spindles (Taubenberger et al., 2020). To test whether the roundedness of  
477 spindles and the organization of KMTs in terms of KMT length and minus-end distribution are directly  
478 related, it would be interesting to analyze the organization of KMTs in spindles showing a lower degree of  
479 rounding up during mitosis such as PtK<sub>1</sub> (McDonald et al., 1992) and RPE-1 cells (O'Toole et al., 2020).

480 Extending previous knowledge, we have shown that k-fibers in our reconstructions show a remarkable  
481 morphological variability, as obvious by a change in the circumference of the k-fibers along their entire  
482 length (**Figure 10A-B**). This variability in the circumference of the k-fibers is reflected in an increase in the  
483 local tortuosity of KMTs at positions close to the spindle poles. This increase in the tortuosity of KMTs at

484 spindle poles might promote anchoring of the broadened k-fibers with the non-KMT network through MT-  
485 MT interactions (**Figure 10C-D**).

486 Here, we consider the bundled KMTs as the 'core' of the k-fibers (**Figure 10C**). We used the annotated  
487 KMTs in our reconstruction to identify other non-KMTs associated with these KMTs. In other words, we  
488 annotated the KMTs in the spindles to 'fish out' other non-KMTs out of more than 6000 MTs to identify  
489 those non-KMTs that were positioned in the vicinity of reconstructed KMTs. Explicitly, the results obtained  
490 from our approach do not exclude models of KMT organization, in which the k-fiber is a tight bundle that  
491 continues to the pole with changing composition of KMTs and associated non-KMTs along its length. In  
492 this sense, differences in either the length of KMTs or in the loss of KMTs from the k-fiber might simply  
493 reflect an MT exchange with the spindle (**Figure 10D**). Our consideration of KMTs as the cores of k-fibers  
494 is also not in disagreement with a dynamic change in k-fiber composition during the maturing of those  
495 fibers (Begley et al., 2021; Maiato et al., 2004). Unfortunately, our 3D reconstructions can deliver only  
496 snapshots of the very dynamic mitotic process.

497 While both KMTs and non-KMTs show a clear correlation in the number and the average length of  
498 associations (**Figure 8** and **Figure 9**), both MT populations show differences in the position of these  
499 associations. In contrast to non-KMTs, KMTs show a high tendency to associate with non-KMTs at the  
500 spindle poles (**Figure 8F-G**; **Figure 9C-D**). This tendency to interact at spindle poles is independent of  
501 the chosen distance of MT interaction. In accord with the previously discussed broadening of the k-fibers  
502 at their pole-facing end, our results suggest that KMTs preferably associate with other MTs at the spindle  
503 poles. In contrast, non-KMTs show a flat pattern of interaction with other MTs at association distances of  
504 25 and 35 nm. Moreover, an increase in the association distance from 35 nm to 50 nm, shows a higher  
505 tendency of non-KMTs to associate with MTs in the center of the spindle, very likely related to the  
506 organization of interpolar MTs in the center of the spindle (**Figure 8-figure supplement 1F**; (Kajtez et al.,  
507 2016; Mastronarde et al., 1993; Vukušić et al., 2017)). In general, it would be interesting to analyze the  
508 organization of these interpolar MTs, the structure of the KMTs in the k-fibers, and also the recognized  
509 patterns of MT-MT interaction during other stages of mitosis, for instance at anaphase. Patterns of the  
510 interaction of KMTs with non-KMTs might be more obvious during the segregation of the chromosomes.

## 511 **Implications for models on spindle organization**

512 As previously noted, we have combined our 3D reconstructions with additional live-cell imaging and  
513 biophysical modeling in a parallel publication (Conway et al., 2021). Combining data on the length and the  
514 position of minus ends of KMTs in spindles (as obtained here by electron microscopy), and the turnover  
515 and movement of tubulin in KMTs as generated by light microscopy, a model was proposed in which  
516 KMTs predominantly nucleate *de novo* at kinetochores, with KMTs growing towards the spindle poles. A  
517 major outcome of this parallel study is that KMTs in spindles grow along the same trajectories as non-  
518 KMTs and that both the KMTs and non-KMTs are well aligned throughout the spindle, leading to the  
519 assumption that spindles can be considered as active liquid crystals (Brugués and Needleman, 2014;

520 Oriola et al., 2020). This might apply to both centrosomal mitotic as well as acentrosomal female meiotic  
521 spindles (Redemann et al., 2018, 2017). Such liquid crystals can be characterized by the degree of local  
522 MT alignment, expressed by the nematic order parameter. Interestingly, the analyzed spindles show a  
523 high nematic order parameter  $S = 0.81 \pm 0.02$  near the chromosomes, whereas the nematic order  
524 parameter  $S = 0.54 \pm 0.02$  is lower at the spindle poles (Conway et al., 2021). Along this line, KMTs in our  
525 electron tomography study are well aligned in the middle of the spindle, while the order of the KMTs in the  
526 k-fibers is progressively lost at positions closer to the spindle poles. While KMTs are growing out from the  
527 kinetochores towards the centrosomes, the observed broadening of the k-fibers at the spindle poles might  
528 be a direct consequence of a change (i.e., a decrease) in the internal structural organization of the  
529 spindle trajectories (i.e., the surrounding non-KMTs). In the future, it will be important to analyze k-fibers  
530 in other fully 3D-reconstructed mammalian spindles, thus allowing an advancement of the developed  
531 model on KMT outgrowth in the context of such well-defined trajectories.

## 532 Material and Methods

### 533 Key resource table

| Reagent type (species) or resource | Designation                                                                                                     | Source or reference                                                                     | Identifiers | Additional information                                                            |
|------------------------------------|-----------------------------------------------------------------------------------------------------------------|-----------------------------------------------------------------------------------------|-------------|-----------------------------------------------------------------------------------|
| Strain, background (HeLa, Kyoto)   | Gerlich Lab                                                                                                     | IMBA, Vienna, Austria                                                                   | -           | -                                                                                 |
| Software, algorithm                | SerialEM<br><br>Boulder Laboratory for<br>3-Dimensional<br>Electron Microscopy<br>of cells<br><br>Colorado, USA | <a href="https://bio3d.colorado.edu/SerialEM/">https://bio3d.colorado.edu/SerialEM/</a> | -           | -                                                                                 |
| Software, algorithm                | IMOD<br><br>Boulder Laboratory for<br>3-Dimensional<br>Electron Microscopy<br>of cells<br><br>Colorado, USA     | <a href="http://bio3d.colorado.edu/imod">http://bio3d.colorado.edu/imod</a>             | -           | -                                                                                 |
| Software, algorithm                | Amira<br><br>Thermo Fisher Scientific, USA                                                                      | Zuse Institute Berlin (ZIB)                                                             | -           | -                                                                                 |
| Software, algorithm                | ASGA<br><br>Robert Kiewisz /<br>Müller - Reichert Lab<br><br>Dresden, Germany                                   | <a href="https://github.com/RRobert92/ASGA">https://github.com/RRobert92/ASGA</a>       | -           | <a href="https://kiewisz.shinyapps.io/ASGA">https://kiewisz.shinyapps.io/ASGA</a> |

|                        |                                                                                           |                                                                                                          |   |                                                                                                      |
|------------------------|-------------------------------------------------------------------------------------------|----------------------------------------------------------------------------------------------------------|---|------------------------------------------------------------------------------------------------------|
| Software,<br>algorithm | ASGA - 3D Viewer<br><br>Robert Kiewisz /<br>Müller - Reichert Lab<br><br>Dresden, Germany | <a href="https://github.com/RRobert92/ASGA_3DViewer">https://github.com/RRobert92/<br/>ASGA_3DViewer</a> | - | <a href="https://cfci.shinyapps.io/ASGA_3DViewer/">https://cfci.shinyapps.io/<br/>ASGA_3DViewer/</a> |
|------------------------|-------------------------------------------------------------------------------------------|----------------------------------------------------------------------------------------------------------|---|------------------------------------------------------------------------------------------------------|

534

## 535 **Cell line**

536 For all experiments we have used a HeLa Kyoto cell line obtained from Daniel Gerlich lab (IMBA,  
537 Vienna), which was given to the Gerlich lab by S. Narumiya (Kyoto, Japan; RRID: CVCL\_1922) and  
538 validated using Multiplex Human Cell Line Authentication test (MCA). Furthermore, the HeLa Kyoto cell  
539 line was checked for mycoplasma with a PCR test kit. This cell line was not on the list of commonly  
540 misidentified cell lines as maintained by the International Cell Line Authentication Committee.

## 541 **Cultivation of cells**

542 HeLa (Kyoto) cells (Guizetti et al., 2011) were grown in Dulbecco's Modified Eagle's Medium (DMEM)  
543 supplemented with 10% fetal bovine serum (FBS) and 100 units/ml of penicillin/streptomycin (Pen/Strep).  
544 Flasks were placed in a humidified incubator at 37°C with a supply of 5% CO<sub>2</sub>. For electron microscopy,  
545 cells in mitosis were enriched by applying the shake-off technique (Kiewisz et al., 2021). Flasks with cell  
546 confluency of 60-80% were shaken against the laboratory bench. The medium with detached cells was  
547 then collected, centrifuged at 1200 rpm for 3 min at room temperature, and resuspended in 1 ml of pre-  
548 warmed DMEM medium.

## 549 **Electron tomography**

### 550 *Specimen preparation for electron microscopy*

551 Cultures enriched in mitotic HeLa cells were further processed for electron microscopy essentially as  
552 described (Guizetti et al., 2011; Kiewisz et al., 2021). Briefly, sapphire discs with a diameter of 6 mm were  
553 cleaned in Piranha solution (1:1 H<sub>2</sub>SO<sub>4</sub> and H<sub>2</sub>O<sub>2</sub>, v/v), coated with poly-L-lysine (0.1% in ddH<sub>2</sub>O, w/v),  
554 and dried for 2 hrs at 60°C. Furthermore, the discs were coated with fibronectin (1:10 dilution in 1x PBS,  
555 v/v) for 2 hrs and stored in a humidified incubator until further used. The sapphire discs were then placed  
556 into custom-designed 3D-printed incubation chambers (Kiewisz et al., 2021). Subsequently, cells were  
557 seeded on the coated sapphire discs and incubated for 10 min in a humidified incubator at 37°C supplied  
558 with 5% CO<sub>2</sub>. This allowed the mitotic cells to re-attach to the surface of the coated sapphire discs and  
559 continue to divide.



560 *High-pressure freezing and freeze substitution*

561 Cells were cryo-immobilized using an EM ICE high-pressure freezer (Leica Microsystems, Austria). For  
562 each run of freezing, a type-A aluminum carrier (Wohlwend, Switzerland) with the 100  $\mu\text{m}$ -cavity facing up  
563 was placed in the specimen loading device of the EM ICE. The cavity of the type-A carrier was filled with  
564 5  $\mu\text{l}$  of DMEM containing 10% BSA. The carrier was then immediately closed by placing a 6 mm-sapphire  
565 disc with attached cells facing down on top of the type-A carrier. Finally, a spacer ring was mounted on  
566 top of the closed carrier, and freezing was started. Samples were frozen under high pressure (~2,000 bar)  
567 with a cooling rate of ~20,000  $^{\circ}\text{C}/\text{s}$  (Reipert et al., 2004). Frozen samples were then opened under liquid  
568 nitrogen and transferred to cryo-vials filled with anhydrous acetone containing 1% (w/v) osmium tetroxide  
569 (EMS, USA) and 0.1% (w/v) uranyl acetate (Polysciences, USA). Freeze substitution was performed in  
570 either a Leica AFS or a Lecia AFS II (Leica Microsystems, Austria). Samples were kept at  $-90^{\circ}\text{C}$  for 1 h,  
571 warmed up to  $-30^{\circ}\text{C}$  with increments of 5  $^{\circ}\text{C}/\text{h}$ , kept for 5 hrs at  $-30^{\circ}\text{C}$ , and then warmed up to  $0^{\circ}\text{C}$   
572 (increments of 5  $^{\circ}\text{C}/\text{h}$ ). Finally, samples were allowed to warm up to room temperature. After freeze  
573 substitution, samples were washed three times with pure anhydrous acetone and infiltrated with  
574 Epon/Araldite (EMS, USA) using increasing concentrations of resin (resin:acetone: 1:3, 1:1, 3:1, then  
575 pure resin) for 1 hr each step at room temperature (Muller-Reichert et al., 2003). Samples were infiltrated  
576 with pure resin overnight and then embedded by using commercial flow-through chambers (Leica  
577 Microsystems, Austria) designed for sapphire discs of a diameter of 6 mm. Samples were polymerized at  
578  $60^{\circ}\text{C}$  for 36 hrs.

579 *Pre-selection of staged cells*

580 To select cells in metaphase, resin-embedded samples were pre-inspected using an Axiolab RE upright  
581 brightfield microscope (Zeiss, Germany) with a 5x and a 40x objective lens (Zeiss, Germany). Selected  
582 cells in metaphase were sectioned using an EM UC6 ultramicrotome (Leica Microsystems, Austria).  
583 Ribbons of semi-thick (~300 nm) serial sections were collected on Formvar-coated copper slot grids,  
584 post-stained with 2% (w/v) uranyl acetate in 70% (v/v) methanol, followed by 0.4% (w/v) lead citrate  
585 (Science Services, USA) in double-distilled water. In addition, 20 nm-colloidal gold (British Biocell  
586 International, UK) was attached to the serial sections, serving as fiducial markers for subsequent electron  
587 tomography. The selected cells were then pre-inspected at low magnification (~2900x) using either an  
588 EM906 (Zeiss, Germany) or a TECNAI T12 Biotwin (ThermoFisher Scientific, USA) transmission electron  
589 microscope operated at either 80 or 120 kV, respectively.

590 *Acquisition and calculation of tomograms*

591 Serial sections of the selected cells were then transferred to a TECNAI F30 transmission electron  
592 microscope (ThermoFisher Scientific, USA) operated at 300 kV and equipped with a US1000 CCD  
593 camera (Gatan, USA). Using a dual-axis specimen holder (Type 2040, Fishione, USA) tilt series were



594 acquired from  $-65^\circ$  to  $+65^\circ$  with a  $1^\circ$  increment at a magnification of 4700x and a final pixel size of 2.32  
595 nm applying the SerialEM software package (Mastronarde, 2005, 2003). For double-tilt electron  
596 tomography, the grids were rotated for 90 degrees and the second tilt series were acquired using identical  
597 microscope settings (Mastronarde, 1997). The tomographic A- and B-stacks were combined using IMOD  
598 (Kremer et al., 1996; Mastronarde and Held, 2017). For each spindle reconstruction, montages of  $2 \times 3$   
599 frames were collected. Depending on the orientation of the spindles during the sectioning process,  
600 between 22 to 35 serial sections were used to fully reconstruct the volumes of the three selected spindles  
601 (**Table 8**).

#### 602 *Segmentation of MTs and stitching of serial tomograms*

603 As previously published (Redemann et al., 2014; Weber et al., 2012), MTs were automatically segmented  
604 using the ZIB Amira (Zuse Institute Berlin, Germany) software package (Stalling et al., 2005). After  
605 manual correction of MT segmentation, the serial tomograms of each recorded cell were stitched using  
606 the segmented MTs as alignment markers (Lindow et al., 2021) Following this pipeline of data acquisition  
607 and 3D reconstruction, three complete models of HeLa cells in metaphase were obtained (**Table 8**). As  
608 also done in our previous study (Redemann et al., 2017), for all the analyses we discarded MT with one  
609 endpoint found at the border of the reconstructed tomogram. These MTs with a high probability were  
610 leaving the tomographic volume. The number of these MTs in all dataset account for  $<1\%$  of all traced  
611 MTs and therefore, we do not expect a relevant error in this analysis.

#### 612 *Z-correction of stacked tomograms*

613 Each stack of serial tomograms was expanded in Z to correct for a sample collapse during data  
614 acquisition (McEwen and Marko, 1998). We corrected this shrinkage by applying a Z-factor to the stacked  
615 tomograms (**Figure 2-figure supplement 2**; (O'Toole et al., 2020)). Taking the microtome setting of 300  
616 nm, we multiplied this value by the number of serial sections. For each spindle, we also determined the  
617 thickness of each serial tomogram and then calculated the total thickness of the reconstruction. The Z-  
618 factor was then determined by dividing the actual thickness of each stack of tomograms by the total  
619 thickness as determined by the microtome setting. Such calculated Z-factors (1.3 for spindle #1, **Figure**  
620 **1B, C and F**; 1.4 for spindle #2, **Figure 1D and G**; and 1.42 for spindle #3, **Figure 1E and H**) were then  
621 applied to our full spindle reconstructions. All quantitative data in this publication are given for the Z-  
622 expanded spindles. For comparison, values for the non-expanded spindles are also given in **Table 12**  
623 and **Table 13**.

#### 624 *Software packages*

625 We used the ZIB extension of the Amira software (Zuse Institute Berlin, Germany) for further quantitative  
626 analyses (Stalling et al., 2005). In addition, an automatic spatial graph analysis (ASGA) software tool was

627 created for the quantification of KMT length and minus-end distribution (Kiewisz and Müller-Reichert,  
628 2021). The ASGA software tool was also used to quantify the position of each k-fiber in the mitotic  
629 spindles and determine the tortuosity, the cross-section area, the shape and the density of KMTs in the k-  
630 fibers.

#### 631 *Staging of spindles*

632 For staging of the three reconstructed metaphase spindles, we determined the inter-kinetochore distance  
633 for each k-fiber pair. More precisely, we analyzed the distance between the paired outer kinetochores.  
634 For this, the closest neighboring sister kinetochores were determined. The center of each kinetochore  
635 was then defined as a median position of all KMT plus ends associated with each selected kinetochore,  
636 and the inter-kinetochore distance was then calculated as the 3D distance between the defined median  
637 centers of each kinetochore pair. For each mitotic spindle, the inter-kinetochore distance is given as the  
638 mean value ( $\pm$ STD). As an additional criterion for mitotic staging, the pole-to-pole distances were  
639 measured. For this, we analyzed the 3D distance between the centers of the manually segmented mother  
640 centrioles in each data set. This read-out was used to determine the spindle size at metaphase.

#### 641 *Classification of MTs*

642 MTs with their putative plus end associated with the chromosomes were defined as KMTs (**Figure 2 -**  
643 **figure supplement 2**). Characteristically, these KMTs showed a parallel arrangement at the site of  
644 attachment to the chromosomes. Unfortunately, identification of individual kinetochores in our electron  
645 tomograms was hindered by the fact that prominent single and electron-dense KMT attachment sites, as  
646 described previously for conventionally fixed cells (**McEwen et al., 1998b**), were not always clearly visible  
647 after cryo-fixation by high-pressure freezing. All other MTs in our 3D reconstructions were classified as  
648 non-KMTs.

#### 649 *MT-centrosome interaction area*

650 For each non-KMT, the end closest to the nearest mother centriole was defined as the minus-end. The  
651 absolute distance of each putative non-KMT minus-end to the nearest mother centriole was measured in  
652 3D. The number of the non-KMT minus ends was then plotted against their distance to the pole. We then  
653 fit a Gaussian distribution to the peak of the non-KMT minus end density near the spindle pole. The  
654 border of spindle poles, termed here the border of the MT-centrosome interaction area, was defined as  
655 two-half widths from the peak of a Gaussian distribution fit to the density peak near the poles in the non-  
656 KMT minus-end density histogram, which was 1.7  $\mu$ m from the centrosome.

657 *Position of MT minus ends*

658 To analyze the position of KMT and non-KMT minus ends in the metaphase spindles, two measurements  
659 were performed. Firstly, the 3D distance between the nearest mother centriole and the KMT and the non-  
660 KMT minus ends for the definition of non-KMT minus ends see above) was determined. Secondly, we  
661 determined the relative position of these ends on the pole-to-kinetochore and the pole-to-pole axis. For  
662 each KMT minus end, the relative position is given as the normalized position between the mother  
663 centriole (position = 0) and the kinetochore (position = 1) and along the spindle axis (**Figure 5-figure**  
664 **supplement 1**). For each non-KMTs minus end, the relative position is given as the normalized position  
665 between two spindle poles (Pole\_1 = 0, and Pole\_2 = 1; **Figure 5A**). The distribution of the relative  
666 positions of KMT and non-KMTs ends (mean  $\pm$  STD) is given for each data set. The number and  
667 percentage of KMT and non-KMTs ends not associated with the spindle pole were defined as minus ends  
668 detected farther than the calculated MT-centrosome interaction area.

669 *Length distribution of MTs*

670 The full length of each reconstructed KMT and non-KMT was measured, and the average ( $\pm$  STD) is  
671 given for each data set. We also analyzed the percentage of short *versus* long KMTs. For each data set,  
672 short KMTs were defined as those shorter than 1.7  $\mu\text{m}$  in length. This threshold was chosen based on the  
673 MT-centrosome interaction area. The long KMTs were identified as KMTs longer than the half-spindle  
674 length for each given data set. Long KMTs were identified as KMTs longer than the half-spindle length for  
675 each given data set.

676 *Interaction of KMTs with non-KMTs*

677 KMT minus-end association with other MT lattices was calculated as a 3D distance. For this analysis,  
678 KMT minus ends were identified as KMT ends that were closer to one of the spindle poles. Finally, a  
679 possible association between KMT ends and other MT lattices was measured by calculating the 3D  
680 distance between KMT ends and every MT lattice in the reconstructed spindle. An interaction between  
681 KMT minus ends and an MT lattice was identified when KMT minus ends were found within a given  
682 interaction distance to any MT lattice. The defined interaction distances were 25, 30, 35, 45, 50, 75 and  
683 100 nm. To account for differences in the density of MTs along the pole-to-pole axis, each KMT  
684 interaction was normalized by calculating the local MT density around each KMT end. This was achieved  
685 by selecting a voxel of  $0.001 \mu\text{m}^3$  with the KMT end in its center and calculating the local MT density by  
686 dividing the number of potential interactions by the voxel volume. For visualization, each KMT was  
687 labeled based on the type of detected interaction with KMTs or non-KMTs. KMTs without any interaction  
688 were also labeled. The percentage of KMTs with any interaction was measured and the average value for  
689 all data sets is given (mean  $\pm$  STD).

690 To identify possible MT minus-end associations with KMT lattices, the 3D distances of the MT minus ends  
691 to KMT lattices were calculated. An association between KMT lattices and MT minus ends was detected  
692 when MT minus ends were positioned within defined interaction distances to the KMT lattices. We  
693 considered the following interaction distances: 25, 30, 35, 45, 50, 75 and 100 nm. In addition, each  
694 interaction was normalized by the local MT density, as described above. The percentage of KMTs with  
695 any interaction was measured and the average from all datasets is given (mean  $\pm$  STD). Moreover, to  
696 calculate the position of interaction, the relative position of MT minus ends on the pole-to-kinetochore axis  
697 was calculated. The relative position of each minus end is given as the normalized position between the  
698 kinetochore (position = 1) and mother centriole (position = 0) along the spindle axis.

#### 699 *Defining kinetochore position*

700 To determine the position of each k-fiber in the mitotic spindle, a position model was created that is based  
701 on the location of each kinetochore on the metaphase plate. For this, the kinetochores of each spindle  
702 were projected in 2D space on the X/Z axis and an ellipse with a semi-major (called a-axis) and a semi-  
703 minor axis (called b-axis) was fitted onto all projected kinetochores. The fitted ellipse was then divided  
704 into three regions ranging from 0 - 50% (central region), from 50 - 75% (intermediate region), and 75 -  
705 100% (peripheral region). Kinetochores with associated k-fibers were then assigned to these three  
706 regions.

#### 707 *Global tortuosity of KMTs*

708 For the analysis of global KMT tortuosity, the ratio of the KMT spline length and the 3D distance between  
709 the plus and the minus end for each KMT was measured. The distribution of KMTs tortuosity (mean,  $\pm$   
710 STD) is given. In addition, the correlation of the tortuosity of KMTs with their length is given as a fitted  
711 polynomial line calculated as a local polynomial regression by the locally estimated scatterplot smoothing  
712 “loess” method. A confidence interval for the created polynomial line was calculated with the t-based  
713 approximation, which is defined as the overall uncertainty of how the fitted polynomial line fits the  
714 population of all data points. Local polynomial regressions and confidence intervals for all data sets were  
715 calculated using the stat 4.0.3 R library (R Core Team, 2021).

#### 716 *Local tortuosity of KMTs*

717 For the calculation of the local tortuosity, each KMT was subsampled with segments of a length of 500  
718 nm. Both the tortuosity and the relative position along the pole-to-kinetochore axis were measured for  
719 each segment. In addition, the correlation of local KMT tortuosity against the relative position is given.  
720 Local polynomial regressions and confidence intervals for all data sets were calculated using the stat  
721 4.0.3 R library (R Core Team, 2021).

722 *The polygonal cross-section area of k-fibers*

723 The cross-section area was calculated every 500 nm along each k-fiber. For each defined k-fiber cross-  
724 section, the KMT positions were mapped on a 2D plane, and the polygonal shape of the k-fiber cross-  
725 sections was calculated based on the position of the KMTs. The polygonal shape was calculated with the  
726 alpha shape algorithm ( $\alpha = 10$ ) using the “ashape3d” function of the alphashape3d 1.3.1 R library  
727 (Lafarge and Pateiro-Lopez, 2020). The alpha shape is the polygon shape formed around a given set of  
728 points (KMTs from a cross-section) created by a carving space around those points with a circle of a  
729 radius defined as  $\alpha$ . The polygonal shape was then built by drawing outline polygon lines between contact  
730 points on the fitted circle. In order to calculate the polygonal area from the polygon shape of the k-fiber  
731 cross-section, a polygonal prism was created by duplicating and shifting a polygonal shape 1  $\mu\text{m}$  in the  
732 X/Y/Z dimension. This creates a prism with a height of 1  $\mu\text{m}$ . The volume of the created 3D object (prism)  
733 was then calculated with alphashape3d 1.3.1 R library (Lafarge and Pateiro-Lopez, 2020) and from this, a  
734 polygonal area could be calculated by dividing the prism volume ( $V_{pp}$ ) by prism high ( $h_{pp} = 1 \mu\text{m}$ ). The  
735 distribution of the k-fiber polygonal area along the pole-to-kinetochore axis is given as a fitted polynomial  
736 line of local polynomial regression using the “loess” method. Confidence intervals were calculated with  
737 the t-based approximation using the stat 4.0.3 R library (R Core Team, 2021).

738 *Density of KMTs in k-fibers*

739 The density of KMTs in the k-fibers was calculated in segments of 500 nm length along the entire path of  
740 each fiber. To determine the percentage of KMTs that were enclosed in the k-fiber for each cross-section,  
741 the number of KMTs enclosed in the given k-fiber section and the circular area were determined. The  
742 radius of the circular area was calculated for each k-fiber at the position of the KMTs attached to the  
743 kinetochores. The distribution of the k-fiber density along the pole-to-pole axis is given as a fitted  
744 polynomial line and a confidence interval calculated with the t-based approximation using the stat 4.0.3 R  
745 library (R Core Team, 2021).

746 *Analysis of KMT-KMT distances*

747 The KMT-KMT distances at a given k-fiber cross-section were selected by a K-nearest neighbor  
748 estimation. An estimation was achieved by calculating a distance matrix between all selected KMTs. Each  
749 KMT-KMT connection was ranked according to its distance. Finally, for each KMT in a k-fiber, neighboring  
750 KMTs were selected by picking KMTs with  $k=1$ . For each k-fiber, the mean KMT-KMT distance and the  
751 standard deviation were calculated.

## 752 *Interaction of MTs*

753 The interaction between MTs was calculated in steps of 20 nm along each MT. For each MT segment,  
754 the distance to a neighboring MT was calculated. In addition, the length of interaction was analyzed for  
755 each detected MT-MT interaction. The length of interaction between MTs was calculated as a sum of the  
756 20-nm segments. This analysis was performed for defined interaction distances of 25, 30, 35, 45 and 50  
757 nm. The frequency plots for the average number of interactions per MT and the average length of  
758 interaction length are given for each interaction distance. Each MT segment is labeled based on the  
759 number of interactions.

## 760 *Error analysis*

761 For the tracing of MTs, the error associated with our approach was previously analyzed for the 3D  
762 reconstructions of mitotic centrosomes in the early *C. elegans* embryo using serial semi-thick plastic  
763 sections (Weber et al., 2012). Although the data on mammalian spindles is larger, the tomogram content  
764 of this current study is similar to the published centrosome data sets, and thus we assume that the error  
765 MT tracing lies in the same range of 5–10%. All traced MTs were manually verified. This was achieved by  
766 using the 'filament editor' tool in the ZIB extension of the Amira software that allowed us to create a  
767 flattened overview of the entire MT track, which was instrumental for quick validation of each MT. Both  
768 false-positive and negative tracings were corrected.

769 However, it is more difficult to estimate the error of the matching algorithm. Our standardized automatic  
770 stitching method has been described in detail in previous publications (Lindow et al., 2021; Redemann et  
771 al., 2014; Weber et al., 2012). In general, the stitching depends on the local density and properties of the  
772 MTs. For this reason, the stitched MTs were manually verified and corrected (Lindow et al., 2021). In  
773 particular, all KMTs in our reconstructions were checked for correct stitching across section borders.  
774 Examples of correct stitching of MTs at section borders are given in **Figure 3-figure supplement 1**. The  
775 quality of the analysis of the MTs, especially the KMTs, should therefore be influenced by minor errors. In  
776 our previous publications (Redemann et al., 2014; Weber et al., 2012), we estimated the overall quality of  
777 the stitching by analyzing the distribution of MT endpoints in the Z-direction (i.e., normal to the plane of  
778 the slice). We expect to find approximately the same density of MT endpoints along the Z-direction of  
779 each serial-section tomogram. This distribution is visualized in the *Serial Section Aligner* tool previously  
780 presented (Lindow et al., 2021). Therefore, if the density of endpoints after matching is approximately the  
781 same along the Z-direction of the serial-section tomograms, we can assume that the number of artificial  
782 points that have been introduced at the interfaces of the serial sections are negligible. This was visualized  
783 by projecting each spindle along the Y/Z axis (**Figure 3 - figure supplement 1**).

## 784 **Custom-designed software for the visualization of 3D data**

785 For better visualization of the 3D organization of KMTs in k-fibers, a platform was developed using the  
786 WebGL library (rgl 0.106.8 R library; (Adler et al., 2021)). This platform was implemented for the public  
787 and will allow readers to choose data sets from this publication for interactive visualization of selected  
788 spindle features. For instance, users may choose to visualize the organization of k-fibers or KMTs and  
789 select for the analysis of MT-MT interactions. For an analysis of KMTs, users can select the following  
790 features of analysis such as length distribution, minus-end positioning, curvature, and number at the  
791 kinetochore. For the MT-MT interaction analysis, users can select different interaction distances. This  
792 platform is designed for the continuous addition of 3D reconstructions of spindles obtained from different  
793 systems and can be accessed as follows: [https://cfci.shinyapps.io/ASGA\\_3DViewer/](https://cfci.shinyapps.io/ASGA_3DViewer/).



## 794 **Data availability**

795 Tomographic data before and after the z-expansion has been uploaded to the TU Dresden Open Access  
796 Repository and Archive system (OpARA) and is available as open access:

797 <http://doi.org/10.25532/OPARA-128>

798 We released all datasets in Amira format. The tomographic data are also available in tiff format, which  
799 can be opened either with the ImageJ Fiji (Schindelin et al., 2012) or the IMOD (Kremer et al., 1996)  
800 open-source software packages. The MT-track files containing information about the segmented MTs  
801 were released in binary and ASCII format. To make this task easier for interested readers, the ASGA  
802 (Kiewisz and Müller-Reichert, 2021) open-source software, which is part of this publication, is supplied  
803 with small scripts written in R language, which allows users to read the ASCII format into an array.

804 [https://github.com/RRobert92/ASGA/blob/main/R/bin/Utility/Load\\_Amira.R](https://github.com/RRobert92/ASGA/blob/main/R/bin/Utility/Load_Amira.R)

805 The code used to perform quantitative analysis and visualization of MT organization in spindles has been  
806 uploaded to the GitHub repository and is available as open access under the GPL v3.0 license:

807 <https://github.com/RRobert92/ASGA>; [https://github.com/RRobert92/ASGA\\_3DViewer](https://github.com/RRobert92/ASGA_3DViewer)

808 The supplementary high-resolution videos have also been uploaded to YouTube. | These movies can be  
809 found at this URL:

810 <https://youtube.com/playlist?list=PL-L6a60L11laVrVBFZqGi0wmULXD1b4Px>



## 811 **Acknowledgments**

812 The authors would like to thank Dr. Tobias Fürstehaupt (Electron Microscopy Facility at the MPI-CBG,  
813 Dresden, Germany) for technical support. We are also grateful to Drs. Reza Farhadifar, Stefanie  
814 Redemann, Alejandra Laguillo Diego and Isabelle Vernos for a critical reading of the manuscript. We also  
815 would like to thank Felix Herter for implementing a module in the ZIB extension of Amira that we used in  
816 this paper for visualizing different cross-section plains of KMT ends. Research in the Müller-Reichert  
817 laboratory is supported by funds from the Deutsche Forschungsgemeinschaft (MU 1423/8-2). R.K.  
818 received funding from the European Union's Horizon 2020 research and innovation program under the  
819 Marie Skłodowska-Curie grant agreement No. 675737 (grant to T.M.R.). This work was supported by the  
820 NSF-Simons Center for Mathematical and Statistical Analysis of Biology at Harvard (award number  
821 #1764269), and the Harvard Quantitative Biology Initiative.

## 822 **Declaration of interests**

823 The authors declare no competing financial interests.

824

## 825 References

- 826 Adler D, Murdoch D, Nenadic O, Urbanek S, Chen M, Gebhardt A, Bolker B, Csardi G, Srzelecki A,  
827 Senger A. 2021. RGL - 3D visualization device system for R using OpenGL.
- 828 Agarwal PK. 2018. Public Administration Challenges in the World of AI and Bots. *Public*  
829 *Administration Review* **78**:917–921. doi:10.1111/puar.12979
- 830 Almeida AC, Oliveira J, Drpic D, Cheeseman LP, Damas J, Lewin HA, Larkin DM, Aguiar P, Pereira  
831 AJ, Maiato H. 2021. Kinetochore-mediated microtubule assembly and Augmin-dependent  
832 amplification drive k-fiber maturation in mammals Condensed title: Mechanism of mammalian  
833 kinetochore fiber maturation. *bioRxiv*. doi:10.1101/2021.08.18.456780
- 834 Amos LA. 1989. Brain dynein crossbridges microtubules into bundles. *Journal of Cell Science*  
835 **93**:19–28.
- 836 Anjur-Dietrich MI, Kelleher CP, Needleman DJ. 2021. Mechanical Mechanisms of Chromosome  
837 Segregation. *Cells* **10**:465. doi:10.3390/cells10020465
- 838 Begley MA, Solon AL, Davis EM, Sherrill MG, Ohi R, Elting MW. 2021. K-fiber bundles in the mitotic  
839 spindle are mechanically reinforced by Kif15. *Molecular Biology of the Cell*  
840 **32**:2020.05.19.104661. doi:10.1091/mbc.E20-06-0426
- 841 Bougé A-L, Parmentier M-L. 2016. Tau excess impairs mitosis and kinesin-5 function, leading to  
842 aneuploidy and cell death. *Disease Models & Mechanisms*. doi:10.1242/dmm.022558
- 843 Brinkley BR, Cartwright J. 1975. COLD-LABILE AND COLD-STABLE MICROTUBULES IN THE  
844 MITOTIC SPINDLE OF MAMMALIAN CELLS. *Ann N Y Acad Sci* **253**:428–439.  
845 doi:10.1111/j.1749-6632.1975.tb19218.x
- 846 Brugués J, Needleman D. 2014. Physical basis of spindle self-organization. *Proceedings of the*  
847 *National Academy of Sciences* **111**:18496–18500. doi:10.1073/pnas.1409404111
- 848 Burbank KS, Mitchison TJ, Fisher DS. 2007. Slide-and-Cluster Models for Spindle Assembly.  
849 *Current Biology* **17**:1373–1383. doi:10.1016/j.cub.2007.07.058
- 850 Cherry LM, Faulkner AJ, Grossberg LA, Balczon R. 1989. Kinetochore size variation in mammalian  
851 chromosomes: an image analysis study with evolutionary implications. *J Cell Sci* **92**:281–289.
- 852 Conway W, Kiewisz R, Fabig G, Kelleher, Colm, Wu, Hai-Yin, Anjur-Dietrich, Maya, Müller-  
853 Reichert T, Needleman DJ. 2021. Self-organization of kinetochore-fibers in human mitotic  
854 spindles. *bioRxiv*.

- 855 DeLuca JG, Gall WE, Ciferri C, Cimini D, Musacchio A, Salmon ED. 2006. Kinetochores Microtubule  
856 Dynamics and Attachment Stability Are Regulated by Hec1. *Cell* **127**:969–982.  
857 doi:10.1016/j.cell.2006.09.047
- 858 Drpic D, Almeida AC, Aguiar P, Renda F, Damas J, Lewin HA, Larkin DM, Khodjakov A, Maiato H.  
859 2018. Chromosome Segregation Is Biased by Kinetochores Size. *Current Biology* **28**:1344-  
860 1356.e5. doi:10.1016/j.cub.2018.03.023
- 861 Dumont S, Mitchison TJ. 2009. Force and Length in the Mitotic Spindle. *Current Biology* **19**:749–  
862 761. doi:10.1016/j.cub.2009.07.028
- 863 Fabig G, Kiewisz R, Lindow N, Powers JA, Cota V, Quintanilla LJ, Brugués J, Prohaska S, Chu DS,  
864 Müller-Reichert T. 2020. Male meiotic spindle features that efficiently segregate paired and  
865 lagging chromosomes. *Elife* **9**. doi:10.7554/eLife.50988
- 866 Falnikar A, Tole S, Baas PW. 2011. Kinesin-5, a mitotic microtubule-associated motor protein,  
867 modulates neuronal migration. *Molecular Biology of the Cell* **22**:1561–1574.  
868 doi:10.1091/mbc.e10-11-0905
- 869 Farhadifar R, Yu C-H, Fabig G, Wu H-Y, Stein DB, Rockman M, Müller-Reichert T, Shelley MJ,  
870 Needleman DJ. 2020. Stoichiometric interactions explain spindle dynamics and scaling across  
871 100 million years of nematode evolution. *Elife* **9**:1–26. doi:10.7554/eLife.55877
- 872 Flemming W. 1879. Beiträge zur Kenntniss der Zelle und ihrer Lebenserscheinungen. *Archiv für*  
873 *Mikroskopische Anatomie* **16**:302–436. doi:10.1007/BF02956386
- 874 Godek KM, Kabeche L, Compton DA. 2015. Regulation of kinetochores–microtubule attachments  
875 through homeostatic control during mitosis. *Nature Reviews Molecular Cell Biology* **16**:57–64.  
876 doi:10.1038/nrm3916
- 877 Guizetti J, Schermelleh L, Mäntler J, Maar S, Poser I, Leonhardt H, Müller-Reichert T, Gerlich DW.  
878 2011. Cortical Constriction During Abscission Involves Helices of ESCRT-III-Dependent  
879 Filaments. *Science (1979)* **331**:1616–1620. doi:10.1126/science.1201847
- 880 Hoffman DP, Shtengel G, Xu CS, Campbell KR, Freeman M, Wang L, Milkie DE, Pasolli HA, Iyer N,  
881 Bogovic JA, Stabley DR, Shirinifard A, Pang S, Peale D, Schaefer K, Pomp W, Chang C-L,  
882 Lippincott-Schwartz J, Kirchhausen T, Solecki DJ, Betzig E, Hess HF. 2020. Correlative three-  
883 dimensional super-resolution and block-face electron microscopy of whole vitreously frozen  
884 cells. *Science (1979)* **367**. doi:10.1126/science.aaz5357
- 885 Inoué S. 1953. Polarization optical studies of the mitotic spindle. *Chromosoma* **5**:487–500.  
886 doi:10.1007/BF01271498
- 887 Inoué S, Salmon ED. 1995. Force Generation by Microtubule Assembly/Disassembly in Mitosis and  
888 Related Movements. *Molecular Biology of the Cell* **6**:1619–1640. doi:10.1091/mbc.6.12.1619

- 889 Kajtez J, Solomatina A, Novak M, Polak B, Vukušić K, Rüdiger J, Cojoc G, Milas A, Šumanovac  
890 Šestak I, Risteski P, Tavano F, Klemm AH, Roscioli E, Welburn J, Cimini D, Glunčić M, Pavin  
891 N, Tolić IM. 2016. Overlap microtubules link sister k-fibres and balance the forces on bi-  
892 oriented kinetochores. *Nature Communications* **7**:10298. doi:10.1038/ncomms10298
- 893 Kellogg EH, Howes S, Ti S-C, Ramírez-Aportela E, Kapoor TM, Chacón P, Nogales E. 2016. Near-  
894 atomic cryo-EM structure of PRC1 bound to the microtubule. *Proceedings of the National  
895 Academy of Sciences* **113**:9430–9439. doi:10.1073/pnas.1609903113
- 896 Khodjakov A, Cole RW, McEwen BF, Buttle KF, Rieder CL. 1997. Chromosome Fragments  
897 Possessing Only One Kinetochores Can Congress to the Spindle Equator. *Journal of Cell  
898 Biology* **136**:229–240. doi:10.1083/jcb.136.2.229
- 899 Kiewisz R, Müller-Reichert T. 2021. Automatic Spatial-Graph Analysis (ASGA).  
900 doi:<https://doi.org/10.5281/zenodo.3732108>
- 901 Kiewisz R, Müller-Reichert T, Fabig G. 2021. High-throughput screening of mitotic mammalian cells  
902 for electron microscopy using classic histological dyes In: Müller-Reichert T, Verkade P,  
903 editors. *Methods in Cell Biology: Correlative Light and Electron Microscopy IV*. New Jersey:  
904 Academic Press Inc. pp. 151–170. doi:10.1016/bs.mcb.2020.08.005
- 905 Kremer JR, Mastrorade DN, McIntosh JR. 1996. Computer Visualization of Three-Dimensional  
906 Image Data Using IMOD. *Journal of Structural Biology* **116**:71–76. doi:10.1006/jsbi.1996.0013
- 907 Kuhn J, Dumont S. 2019. Mammalian kinetochores count attached microtubules in a sensitive and  
908 switch-like manner. *Journal of Cell Biology* **218**:3583–3596. doi:10.1083/jcb.201902105
- 909 Lafarge T, Pateiro-Lopez B. 2020. alphashape3d: Implementation of the 3D Alpha-Shape for the  
910 Reconstruction of 3D Sets from a Point Cloud.
- 911 Lindow N, Brünig FN, Dercksen VJ, Fabig G, Kiewisz R, Redemann S, Müller-Reichert T, Prohaska  
912 S, Baum D. 2021. Semi-automatic stitching of filamentous structures in image stacks from  
913 serial-section electron tomography. *Journal of Microscopy* **284**:25–44. doi:10.1111/jmi.13039
- 914 Liodice I, Janson M, Tavormina P, Schaub S, Bhatt D, Cochran R, Czupryna J, Fu C, Tran P.  
915 2019. Quantifying Tubulin Concentration and Microtubule Number Throughout the Fission  
916 Yeast Cell Cycle. *Biomolecules* **9**:86. doi:10.3390/biom9030086
- 917 Long AF, Suresh P, Dumont S. 2020. Individual kinetochores locally dissipate force to maintain  
918 robust mammalian spindle structure. *Journal of Cell Biology* **219**:1–13.  
919 doi:10.1083/jcb.201911090
- 920 Luther PK, Lawrence MC, Crowther RA. 1988. A method for monitoring the collapse of plastic  
921 sections as a function of electron dose. *Ultramicroscopy* **24**:7–18. doi:10.1016/0304-  
922 3991(88)90322-1

- 923 Maiato H, Rieder CL, Khodjakov A. 2004. Kinetochore-driven formation of kinetochore fibers  
924 contributes to spindle assembly during animal mitosis. *Journal of Cell Biology* **167**:831–840.  
925 doi:10.1083/jcb.200407090
- 926 Mastronarde DN. 2005. Automated electron microscope tomography using robust prediction of  
927 specimen movements. *Journal of Structural Biology* **152**:36–51. doi:10.1016/j.jsb.2005.07.007
- 928 Mastronarde DN. 2003. SerialEM: A Program for Automated Tilt Series Acquisition on Tecnai  
929 Microscopes Using Prediction of Specimen Position. *Microscopy and Microanalysis* **9**:1182–  
930 1183. doi:10.1017/S1431927603445911
- 931 Mastronarde DN, Held SR. 2017. Automated tilt series alignment and tomographic reconstruction in  
932 IMOD. *Journal of Structural Biology* **197**:102–113. doi:10.1016/j.jsb.2016.07.011
- 933 Mastronarde DN, McDonald KL, Ding R, McIntosh JR. 1993. Interpolar spindle microtubules in PTK  
934 cells. *Journal of Cell Biology* **123**:1475–1489. doi:10.1083/jcb.123.6.1475
- 935 McDonald KL, O'Toole ET, Mastronarde DN, McIntosh JR. 1992. Kinetochore microtubules in PTK  
936 cells. *Journal of Cell Biology* **118**:369–383. doi:10.1083/jcb.118.2.369
- 937 McEwen BF, Ding Y, Heagle AB. 1998a. Relevance of kinetochore size and microtubule-binding  
938 capacity for stable chromosome attachment during mitosis in PtK1 cells. *Chromosome*  
939 *Research* **6**:123–132. doi:10.1023/A:1009239013215
- 940 McEwen BF, Heagle AB, Cassels GO, Buttle KF, Rieder CL. 1997. Kinetochore Fiber Maturation in  
941 PtK1 Cells and Its Implications for the Mechanisms of Chromosome Congression and  
942 Anaphase Onset. *Journal of Cell Biology* **137**:1567–1580. doi:10.1083/jcb.137.7.1567
- 943 McEwen BF, Hsieh C-E, Mattheyses AL, Rieder CL. 1998b. A new look at kinetochore structure in  
944 vertebrate somatic cells using high-pressure freezing and freeze substitution. *Chromosoma*  
945 **107**:366–375. doi:10.1007/s004120050320
- 946 McEwen BF, Marko M. 1998. Chapter 5 Three-Dimensional Transmission Electron Microscopy and  
947 Its Application to Mitosis Research. pp. 81–111. doi:10.1016/S0091-679X(08)61976-7
- 948 McIntosh JR, O'Toole E, Zhudenkov K, Morphew M, Schwartz C, Ataulakhanov FI, Grishchuk EL.  
949 2013. Conserved and divergent features of kinetochores and spindle microtubule ends from  
950 five species. *Journal of Cell Biology* **200**:459–474. doi:10.1083/jcb.201209154
- 951 Metzner R. 1894. Beitrage zur Granulalehre. I. Kern und kerntheilung. *Arch Anat Physiol* 309–348.
- 952 Mitchison T, Kirschner M. 1984. Dynamic instability of microtubule growth. *Nature* **312**:237–242.  
953 doi:10.1038/312237a0
- 954 Moens P. 1979. Kinetochore microtubule numbers of different sized chromosomes. *Journal of Cell*  
955 *Biology* **83**:556–561. doi:10.1083/jcb.83.3.556

- 956 Mollinari C, Kleman J-P, Jiang W, Schoehn G, Hunter T, Margolis RL. 2002. PRC1 is a microtubule  
957 binding and bundling protein essential to maintain the mitotic spindle midzone. *Journal of Cell*  
958 *Biology* **157**:1175–1186. doi:10.1083/jcb.200111052
- 959 Molodtsov MI, Mieck C, Dobbelaere J, Dammermann A, Westermann S, Vaziri A. 2016. A Force-  
960 Induced Directional Switch of a Molecular Motor Enables Parallel Microtubule Bundle  
961 Formation. *Cell* **167**:539-552.e14. doi:10.1016/j.cell.2016.09.029
- 962 Monda JK, Cheeseman IM. 2018. The kinetochore–microtubule interface at a glance. *Journal of Cell*  
963 *Science* **131**. doi:10.1242/jcs.214577
- 964 Muller-Reichert T, Hohenberg H, O'Toole ET, McDonald K. 2003. Cryoimmobilization and three-  
965 dimensional visualization of *C. elegans* ultrastructure. *Journal of Microscopy* **212**:71–80.  
966 doi:10.1046/j.1365-2818.2003.01250.x
- 967 Musacchio A, Desai A. 2017. A Molecular View of Kinetochore Assembly and Function. *Biology*  
968 *(Basel)* **6**:5. doi:10.3390/biology6010005
- 969 Nixon FM, Gutiérrez-Caballero C, Hood FE, Booth DG, Prior IA, Royle SJ. 2015. The mesh is a  
970 network of microtubule connectors that stabilizes individual kinetochore fibers of the mitotic  
971 spindle. *Elife* **4**:1–21. doi:10.7554/eLife.07635
- 972 Nixon FM, Honnor TR, Clarke NI, Starling GP, Beckett AJ, Johansen AM, Brettschneider JA, Prior  
973 IA, Royle SJ. 2017. Microtubule organization within mitotic spindles revealed by serial block  
974 face scanning EM and image analysis. *Journal of Cell Science* **130**:1845–1855.  
975 doi:10.1242/jcs.203877
- 976 Novak M, Polak B, Simunić J, Boban Z, Kuzmić B, Thomae AW, Tolić IM, Pavin N. 2018. The  
977 mitotic spindle is chiral due to torques within microtubule bundles. *Nature Communications*  
978 **9**:1–10. doi:10.1038/s41467-018-06005-7
- 979 Oriola D, Jülicher F, Brugués J. 2020. Active forces shape the metaphase spindle through a  
980 mechanical instability. *Proceedings of the National Academy of Sciences* **117**:16154–16159.  
981 doi:10.1073/pnas.2002446117
- 982 Oriola D, Needleman DJ, Brugués J. 2018. The Physics of the Metaphase Spindle. *Annual Review*  
983 *of Biophysics* **47**:655–673. doi:10.1146/annurev-biophys-060414-034107
- 984 O'Toole E, Morphew M, McIntosh JR. 2020. Electron tomography reveals aspects of spindle  
985 structure important for mechanical stability at metaphase. *Molecular Biology of the Cell*  
986 **31**:184–195. doi:10.1091/MBC.E19-07-0405)
- 987 O'Toole ET, McDonald KL, McIntosh J, McIntosh JR, Hyman AA, Müller-Reichert T. 2003.  
988 Morphologically distinct microtubule ends in the mitotic centrosome of *Caenorhabditis elegans*.  
989 *Journal of Cell Biology* **163**:451–456. doi:10.1083/jcb.200304035



- 990 Prosser SL, Pelletier L. 2017. Mitotic spindle assembly in animal cells: A fine balancing act. *Nature*  
991 *Reviews Molecular Cell Biology*. doi:10.1038/nrm.2016.162
- 992 R Core Team. 2021. R: A language and environment for statistical computing. R Foundation for  
993 Statistical Computing.
- 994 Redemann S, Baumgart J, Lindow N, Shelley M, Nazockdast E, Kratz A, Prohaska S, Brugués J,  
995 Fürthauer S, Müller-Reichert T. 2017. C. elegans chromosomes connect to centrosomes by  
996 anchoring into the spindle network. *Nature Communications* **8**:15288.  
997 doi:10.1038/ncomms15288
- 998 Redemann S, Lantzsch I, Lindow N, Prohaska S, Srayko M, Müller-Reichert T. 2018. A Switch in  
999 Microtubule Orientation during C. elegans Meiosis. *Current Biology* **28**:2991–2997.  
1000 doi:10.1016/j.cub.2018.07.012
- 1001 Redemann S, Weber B, Möller M, Verbavatz J-M, Hyman AA, Baum D, Prohaska S, Müller-Reichert  
1002 T. 2014. The Segmentation of Microtubules in Electron Tomograms Using Amira In: Sharp DJ,  
1003 editor. *Mitosis: Methods and Protocols, Methods in Molecular Biology*. New York: Springer  
1004 Science+ Business Media. pp. 261–278. doi:10.1007/978-1-4939-0329-0\_12
- 1005 Redwine WB, Hernández-López R, Zou S, Huang J, Reck-Peterson SL, Leschziner AE. 2012.  
1006 Structural Basis for Microtubule Binding and Release by Dynein. *Science (1979)* **337**:1532–  
1007 1536. doi:10.1126/science.1224151
- 1008 Reipert S, Fischer I, Wiche G. 2004. High-pressure freezing of epithelial cells on sapphire  
1009 coverslips. *Journal of Microscopy* **213**:81–85. doi:10.1111/j.1365-2818.2004.01260.x
- 1010 Rieder CL. 1981. The structure of the cold-stable kinetochore fiber in metaphase PtK1 cells.  
1011 *Chromosoma* **84**:145–158. doi:10.1007/BF00293368
- 1012 Rieder CL, Salmon ED. 1998. The vertebrate cell kinetochore and its roles during mitosis. *Trends*  
1013 *Cell Biol* **8**:310.
- 1014 Ris H, Witt PL. 1981. Structure of the mammalian kinetochore. *Chromosoma* **82**:153–170.  
1015 doi:10.1007/BF00286101
- 1016 Rosselló C, Lindström L, Eklund G, Corvaisier M, Kristensson M. 2018.  $\gamma$ -Tubulin- $\gamma$ -Tubulin  
1017 Interactions as the Basis for the Formation of a Meshwork. *International Journal of Molecular*  
1018 *Sciences* **19**:3245. doi:10.3390/ijms19103245
- 1019 Schmidt WJ. 1939. Doppelbrechung der Kernspindel und Zugfasertheorie der  
1020 Chromosomenbewegung. *Chromosoma* **1**:253–264. doi:10.1007/BF01271634
- 1021 Sikirzhyski V, Magidson V, Steinman JB, He J, le Berre M, Tikhonenko I, Ault JG, McEwen BF,  
1022 Chen JK, Sui H, Piel M, Kapoor TM, Khodjakov A. 2014. Direct kinetochore–spindle pole

- 1023 connections are not required for chromosome segregation. *Journal of Cell Biology* **206**:231–  
1024 243. doi:10.1083/jcb.201401090
- 1025 Stalling D, Westerhoff M, Hege H-C. 2005. Amira: a Highly Interactive System for Visual Data  
1026 Analysis In: Hansen CD, Johnson CR, editors. *The Visualization Handbook*. Elsevier. pp. 749–  
1027 767.
- 1028 Taubenberger A v., Baum B, Matthews HK. 2020. The Mechanics of Mitotic Cell Rounding. *Frontiers*  
1029 *in Cell and Developmental Biology* **8**. doi:10.3389/fcell.2020.00687
- 1030 Ustinova K, Novakova Z, Saito M, Meleshin M, Mikesova J, Kutil Z, Baranova P, Havlina B,  
1031 Schutkowski M, Matthias P, Barinka C. 2020. The disordered N-terminus of HDAC6 is a  
1032 microtubule-binding domain critical for efficient tubulin deacetylation. *Journal of Biological*  
1033 *Chemistry* **295**:2614–2628. doi:10.1074/jbc.RA119.011243
- 1034 Vukušić K, Buđa R, Bosilj A, Milas A, Pavin N, Tolić IM. 2017. Microtubule Sliding within the  
1035 Bridging Fiber Pushes Kinetochore Fibers Apart to Segregate Chromosomes. *Developmental*  
1036 *Cell* **43**:11-23.e6. doi:10.1016/j.devcel.2017.09.010
- 1037 Warren JD, Orr B, Compton DA. 2020. A comparative analysis of methods to measure kinetochore-  
1038 microtubule attachment stability. pp. 91–116. doi:10.1016/bs.mcb.2020.01.004
- 1039 Weber B, Greenan G, Prohaska S, Baum D, Hege H-C, Müller-Reichert T, Hyman AA, Verbavatz J-  
1040 M. 2012. Automated tracing of microtubules in electron tomograms of plastic embedded  
1041 samples of *Caenorhabditis elegans* embryos. *Journal of Structural Biology* **178**:129–138.  
1042 doi:10.1016/j.jsb.2011.12.004
- 1043 Winey M, Mamay CL, O'Toole ET, Mastronarde DN, Giddings TH, McDonald KL, McIntosh JR.  
1044 1995. Three-dimensional ultrastructural analysis of the *Saccharomyces cerevisiae* mitotic  
1045 spindle. *Journal of Cell Biology* **129**:1601–1615. doi:10.1083/jcb.129.6.1601
- 1046 Yu C-H, Redemann S, Wu H-Y, Kiewisz R, Yoo TY, Conway W, Farhadifar R, Müller-Reichert T,  
1047 Needleman D. 2019. Central-spindle microtubules are strongly coupled to chromosomes  
1048 during both anaphase A and anaphase B. *Molecular Biology of the Cell* **30**:2503–2514.  
1049 doi:10.1091/mbc.E19-01-0074
- 1050
- 1051



1052 **Figures**

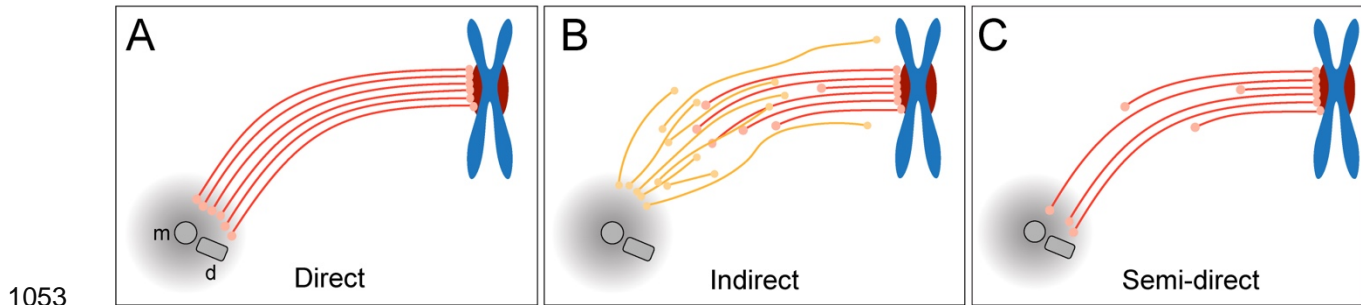

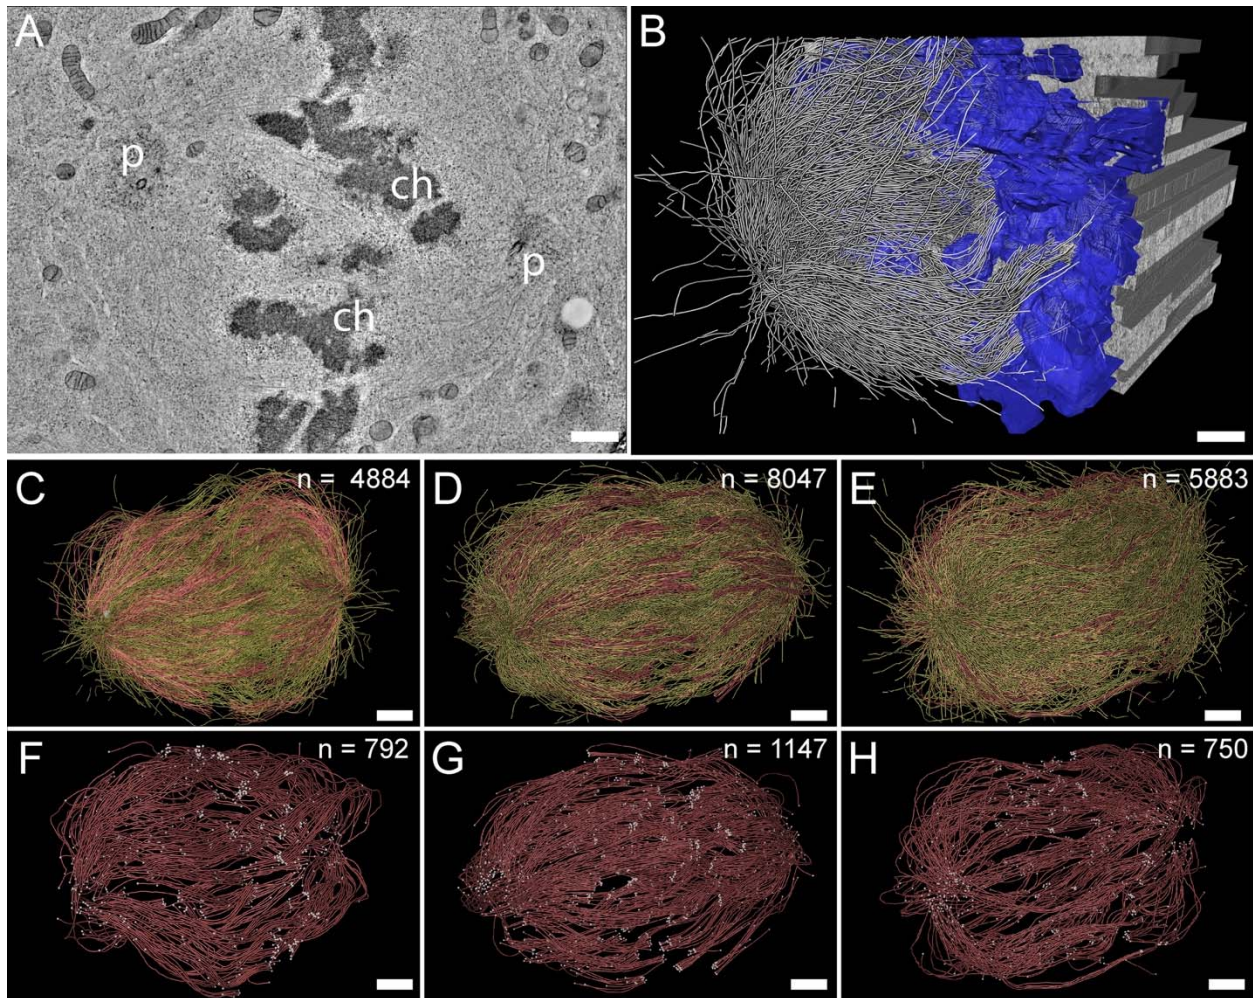

1063

1064 **Figure 2. Three-dimensional reconstruction of metaphase spindles by large-scale**  
1065 **electron tomography**

1066 (A) Tomographic slice showing a HeLa cell (spindle #1) in metaphase. The chromosomes (ch) and the  
1067 spindle poles (p) are indicated. (B) Three-dimensional reconstruction of the same spindle as shown in A.  
1068 The stacking of the serial tomograms used to generate a three-dimensional model of the spindle with the  
1069 MTs (white lines) is visualized. The segmented chromosomes are shown in blue. (C) Three-dimensional  
1070 model of the spindle as shown in A. The total number of all MTs is given in the upper right corner. The  
1071 non-KMTs (yellow lines) and KMTs (red lines) are shown. (D) Full 3D model of metaphase spindle #2. (E)  
1072 Full 3D model of metaphase spindle #3. (F) Extraction of KMTs from the 3D reconstruction as shown in C.  
1073 The number of KMTs is given in the upper right corner. (G) KMTs extracted from spindle #2. (H) KMTs  
1074 extracted from spindle #3. Scale bars, 1  $\mu\text{m}$ .



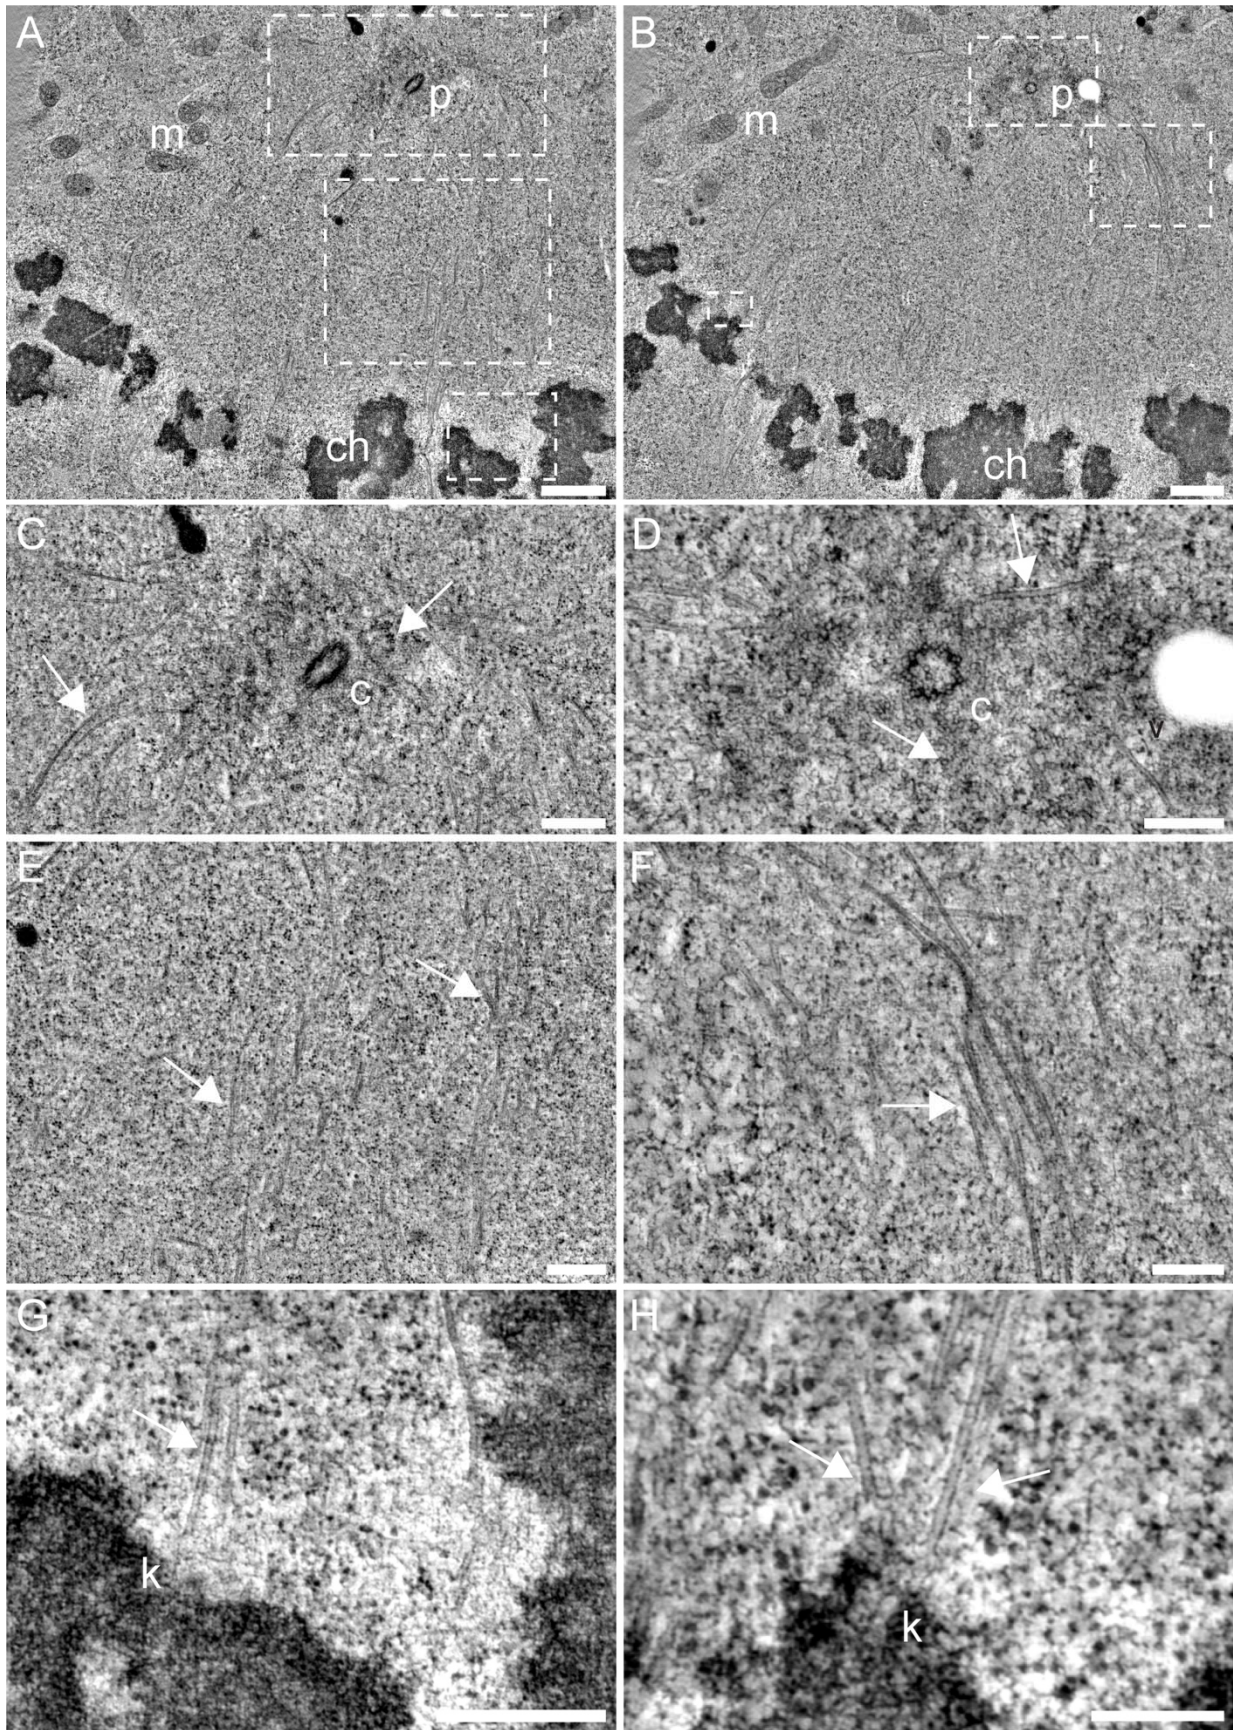

1076 **Figure 2-figure supplement 1. Illustration of metaphase in HeLa cells**

1077 (A-B) Tomographic slices through spindle #3 illustrate the metaphase morphology in HeLa cells. Spindle  
1078 poles (p) with a centriole, chromosomes (ch), and mitochondria (m) are indicated. The boxed regions  
1079 (from top to bottom) show a spindle pole, MTs in between the spindle pole and the chromosomes, and a  
1080 kinetochore region with attached KMTs. Scale bars, 500 nm. (C-D) Tomographic slices showing the  
1081 centrioles (c) and MTs (white arrows) at higher magnification (corresponds to the top boxes in A-B). Scale  
1082 bars, 250 nm. (E-F) Region of the cell between the spindle pole and the chromosomes. MTs (white  
1083 arrows) are marked (corresponds to the mid boxes in A-B). Scale bars, 250 nm. (G-H) Kinetochores (k)  
1084 with associated KMTs (marked by arrows) are shown (corresponds to the bottom boxes in A-B). Scale  
1085 bars, 250 nm.



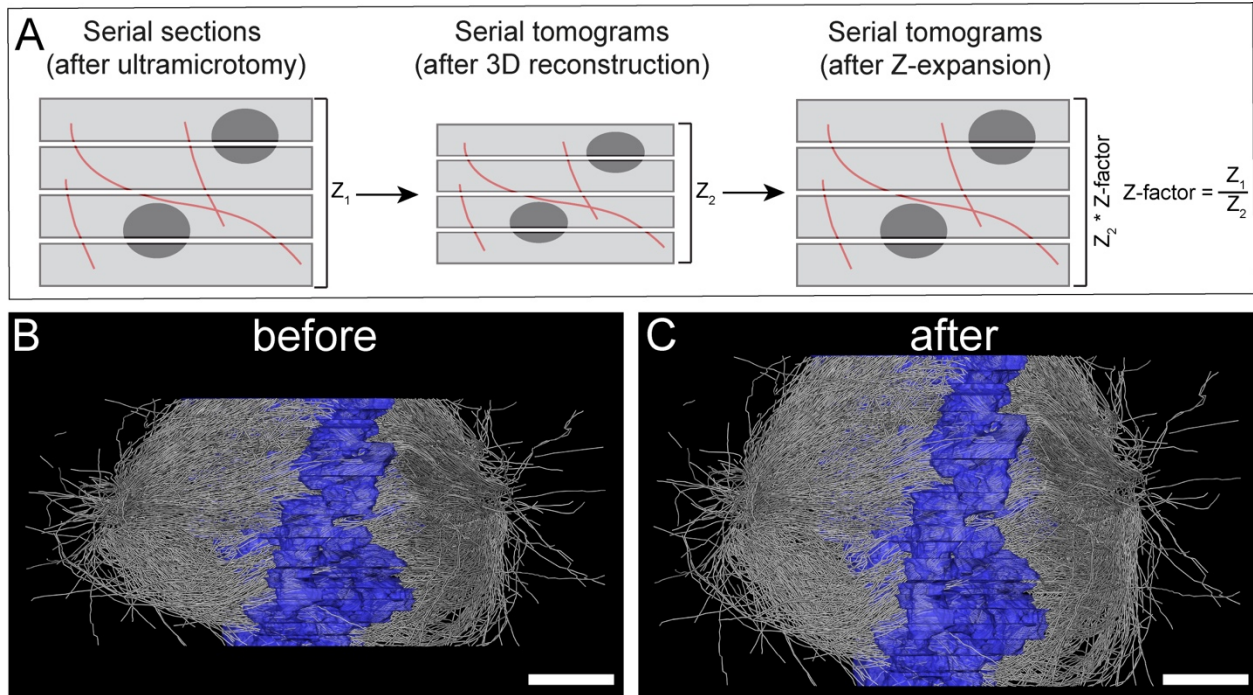

1086

1087 **Figure 2-figure supplement 2. Correction of sample collapse caused during data**  
1088 **acquisition by electron tomography.**

1089 (A) Schematic illustration of correction for a sample collapse in Z. Left panel shows a stack of semi-thick  
1090 sections after ultramicrotomy (total height,  $Z_1$ ). The mid panel illustrates a sample collapse as obvious  
1091 after computational stacking of the serial tomograms (total height,  $Z_2$ ). Right panel, calculation of the Z-  
1092 factor ( $Z_1/Z_2$ ) and correction of the collapse by application of the Z-factor ( $Z_2 * Z\text{-factor}$ ). (B) Side view (Y/Z  
1093 orientation) of the 3D reconstructed spindle #1 before Z-expansion. (C) Side view of the same spindle  
1094 after Z-expansion. Scale bars, 1  $\mu\text{m}$ .

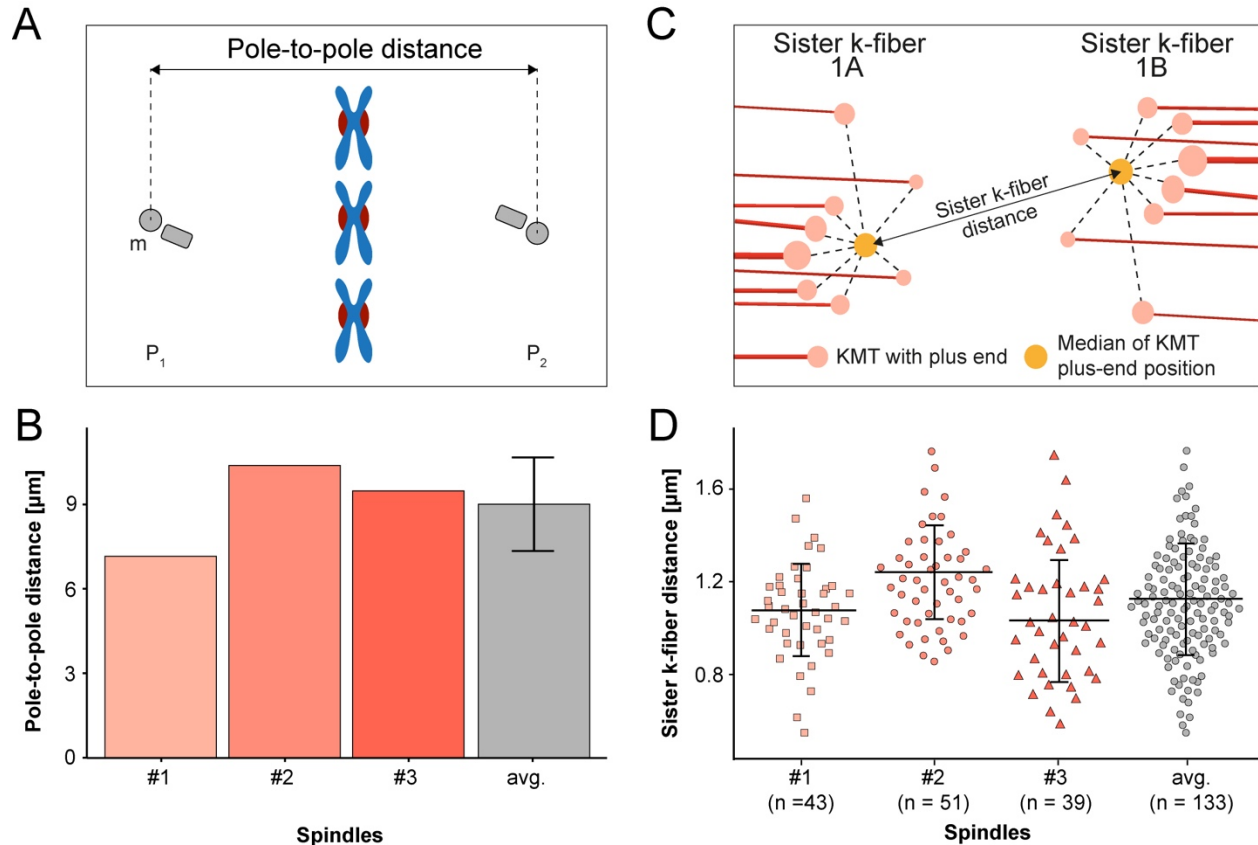

1095

1096 **Figure 2-figure supplement 3. Analysis of pole-to-pole and sister k-fiber**  
 1097 **distances**

1098 (A) Schematic illustration of the pole-to-pole distance. This distance was calculated as a 3D Euclidean  
 1099 distance between the mother centrioles (m, marked in gray) of the two opposing spindle poles ( $P_1$  and  
 1100  $P_2$ ). Chromosomes (blue) and kinetochores (red) are also shown. (B) Bar plot showing the pole-to-pole  
 1101 distance for each data and the average of all data sets (mean  $\pm$  STD indicated by error bar;  $n = 3$ ). Error  
 1102 bar for an average of all data set was indicated. (C) Schematic illustration of the distance between sister  
 1103 k-fiber kinetochore proximal ends (called 1A and 1B) as measured in 3D. The KMTs (red lines) with their  
 1104 plus ends (light red circles) are indicated. The median position (yellow circle) of all KMT plus ends was  
 1105 calculated for each kinetochore pair. (D) Graph showing the average sister k-fiber distance for each data  
 1106 set and the average for all data sets (mean  $\pm$  STD indicated by error bar). The number of measurements  
 1107 per dataset was indicated.

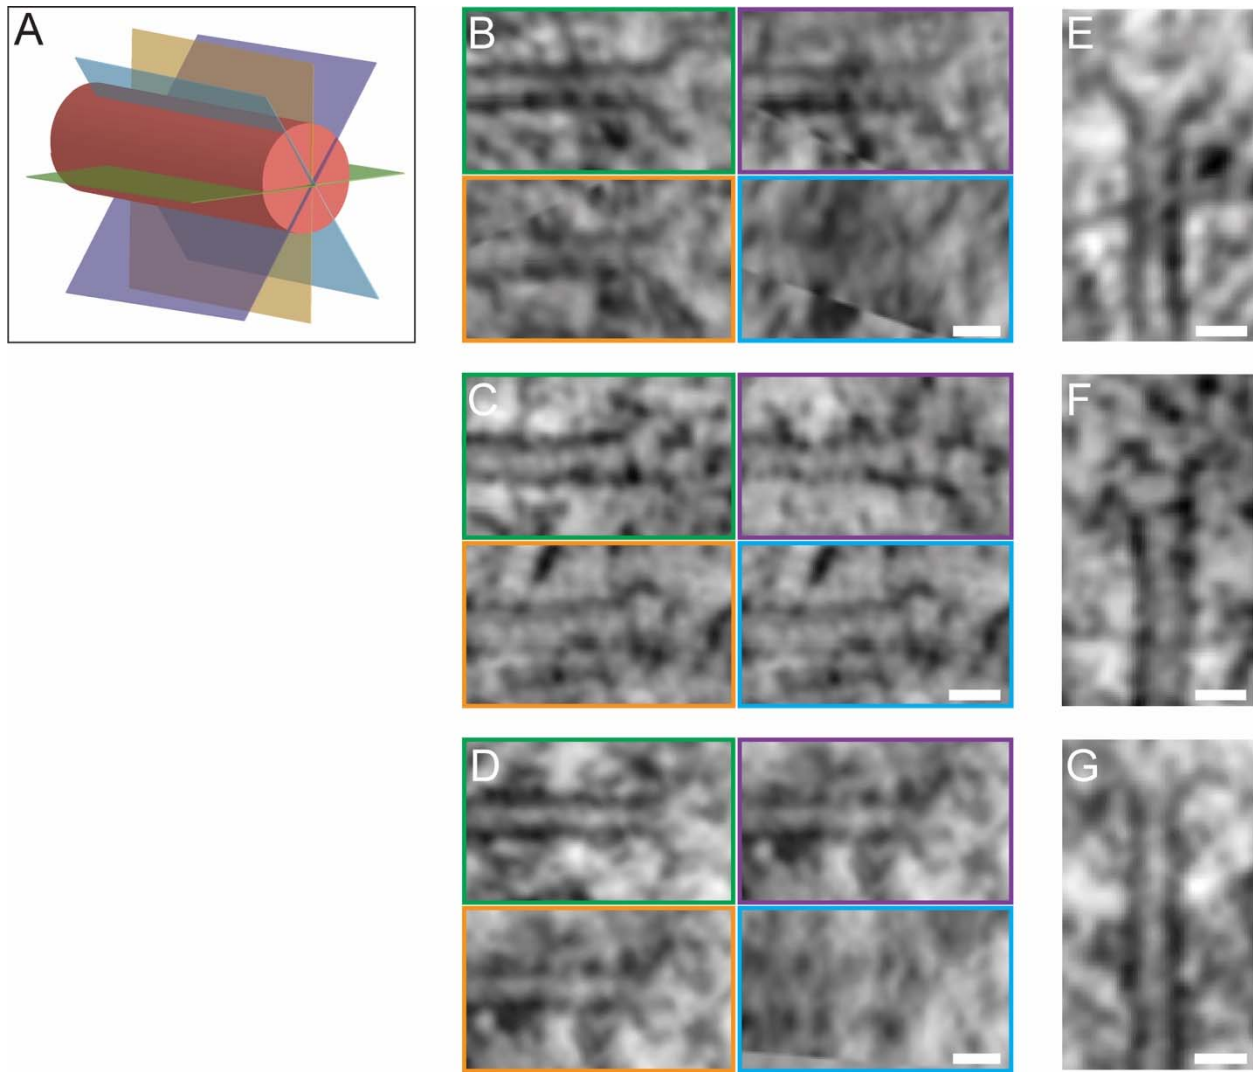

1108

1109 **Figure 2-figure supplement 4. Morphology of KMT plus ends**

1110 (A) Schematic illustration of a KMT (red tube) with different viewing planes (colored in light green, light  
1111 blue, orange and purple). (B-D) Tomographic slices of KMT plus ends are visualized at different viewing  
1112 planes as shown in A. Scale bars, 25 nm. (E-G) Average intensity Z projections of the KMT plus ends as  
1113 shown in B-D. The KMTs show flared open ends. Scale bars, 25 nm.



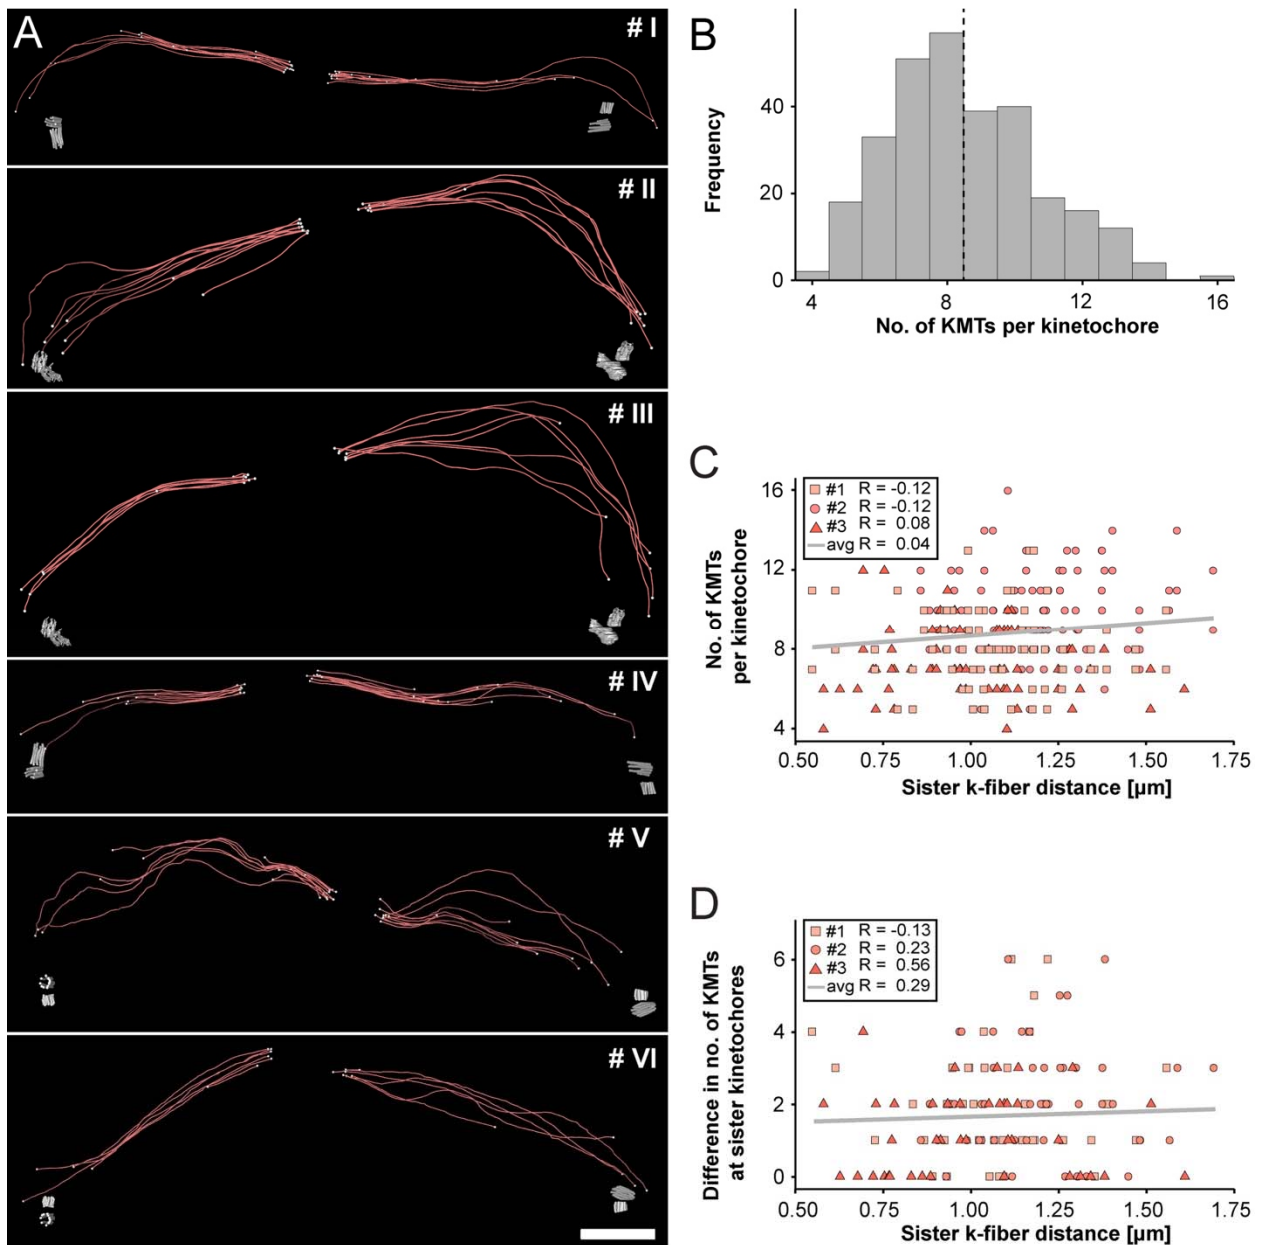

1114

1115 **Figure 3. Morphology of k-fibers and number of KMTs attached per kinetochore**

1116 (A) Examples of individual sister k-fibers extracted from the full 3D reconstructions of metaphase spindles  
 1117 #1. The numbering of these examples (corresponding to the supplementary videos) is given in the upper  
 1118 right corners. KMTs are shown as red lines. The ends of the KMTs are indicated by white spheres,  
 1119 centrioles are shown as cylinders (gray). Scale bar for all examples, 1.5  $\mu\text{m}$ . (B) Histogram plot shows the  
 1120 frequency of detected KMTs per kinetochore. This plot includes data from all three spindle  
 1121 reconstructions. The dashed line (black) indicates the average number of KMTs per kinetochore ( $n =$   
 1122 292). (C) Graph showing the number of KMTs associated per kinetochore plotted against the sister k-fiber  
 1123 distance ( $n = 292$ ). The Pearson's correlation coefficient for each data set and the average coefficient for

1124 all data sets are given. **(D)** Graph showing the difference (delta) in the number of KMTs associated with  
1125 the respective sister kinetochores plotted against the distance between the kinetochore-proximal ends of  
1126 k-fiber pairs (n = 292). The Pearson's correlation coefficient for each data set and the average coefficient  
1127 for all data sets are given.

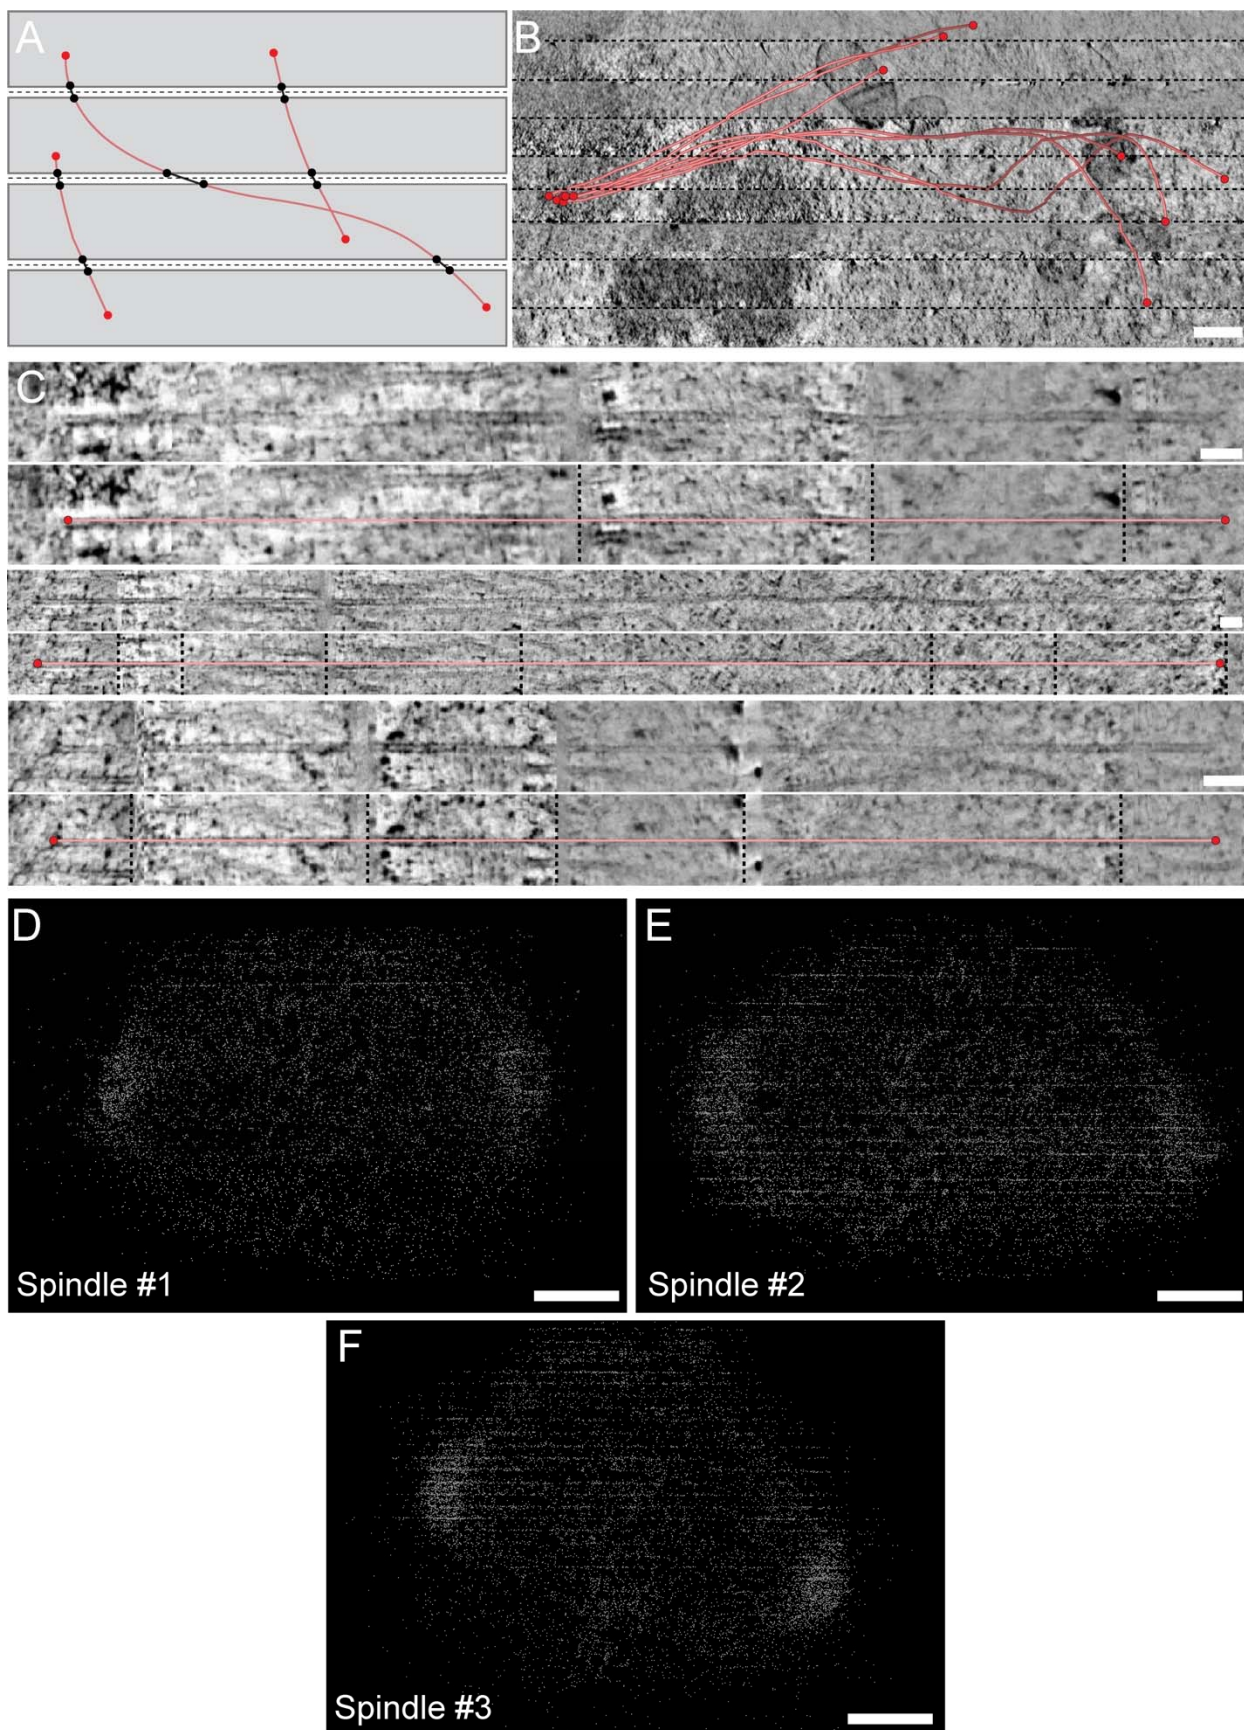

1129 **Figure 3-figure supplement 1. MT segmentation and stitching across consecutive**  
1130 **serial sections**

1131 **(A)** Schematic illustration of MT segmentation across stacked consecutive serial sections. Each section is  
1132 represented as a gray area. MTs are shown as red lines and their ends as red circles. 'Artificial ends' at  
1133 section borders that need to be stitched are labeled by black dots. The horizontal dashed lines (black)  
1134 indicate the seams between the sections. **(B)** Stacked serial tomograms show a selected k-fiber that has  
1135 been followed over several serial sections. The KMTs are indicated as red lines and the ends are marked  
1136 by red circles. The dashed lines (black) indicate the seam regions. Scale bar, 250 nm. **(C)** Longitudinal  
1137 views of KMTs of the same k-fiber as shown in B. The top rows of each reconstruction show selected  
1138 traced KMTs. The bottom rows show the same KMTs with overlays to indicate the length (red line) and  
1139 the ends (red dots) of each KMT. Scale bars, 50 nm. **(D)** Y/Z view of the 3D model of spindle #1 showing  
1140 MT tracings at section borders. Scale bar, 500 nm. **(E)** Y/Z view of spindle #2. Scale bar, 600 nm. **(F)** Y/Z  
1141 view of spindle #3. Scale bar, 500 nm.



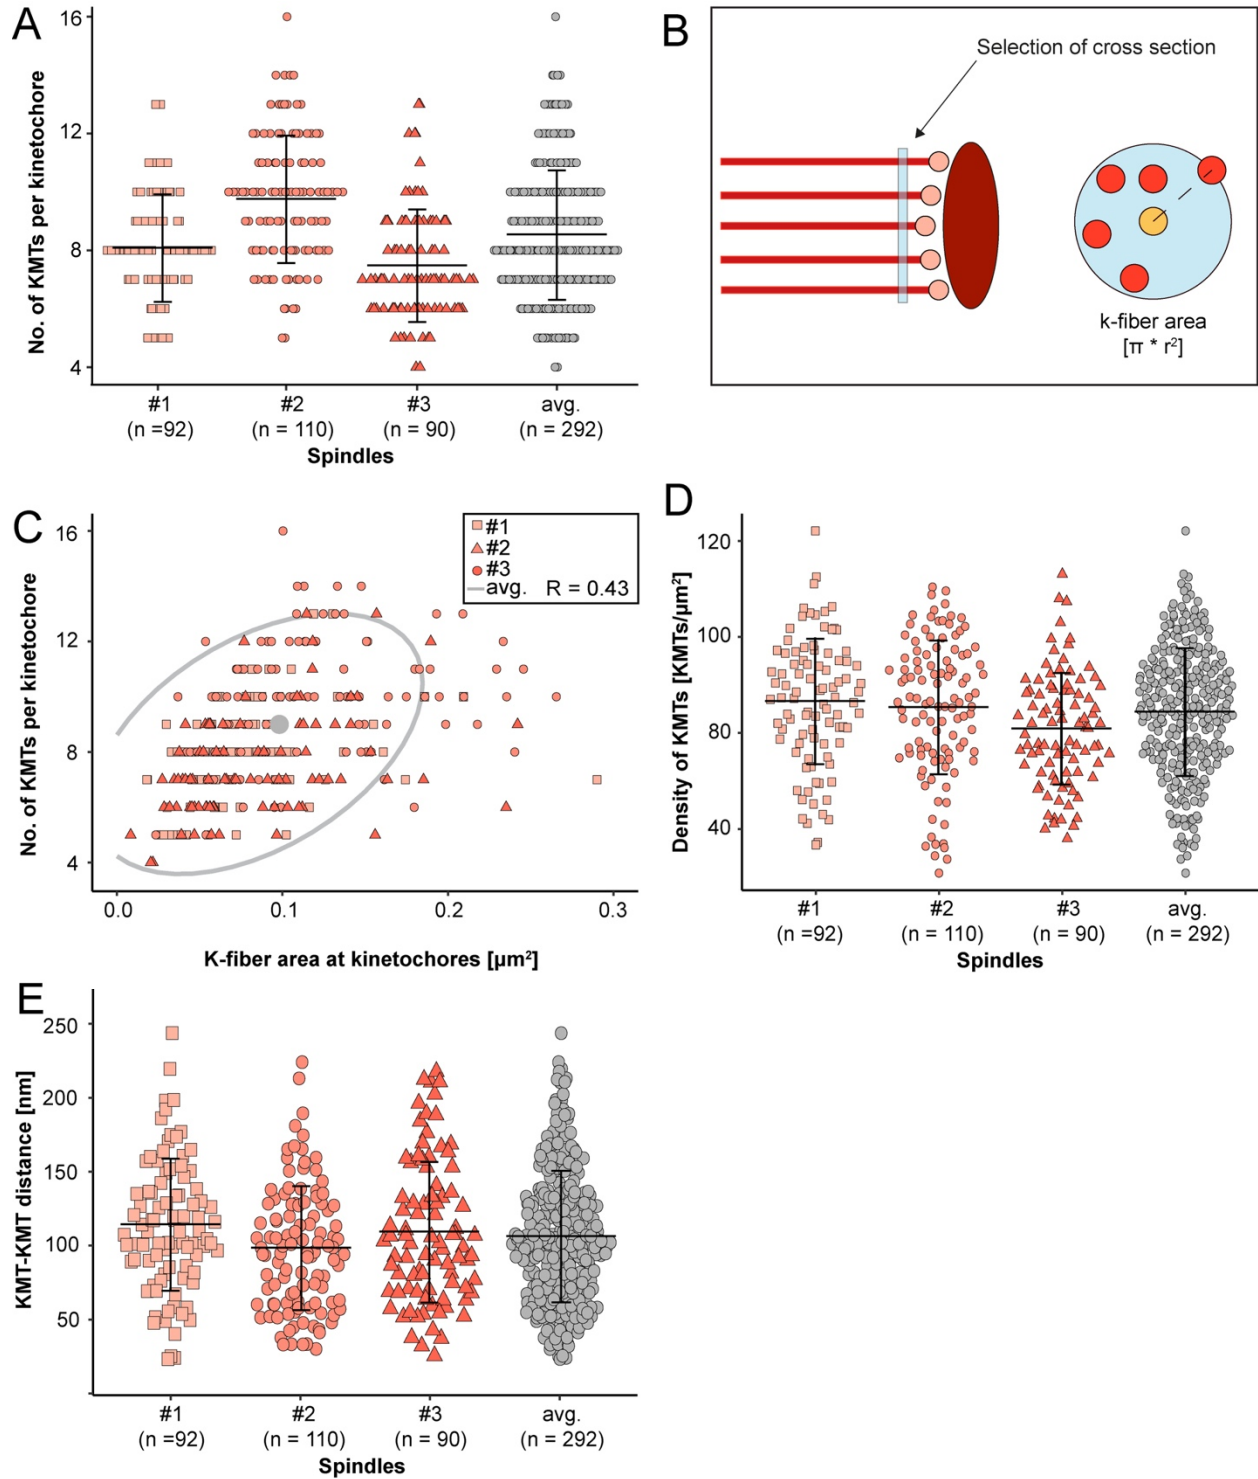

1142

1143 **Figure 3-figure supplement 2. Correlation of k-fiber circumference and number of**  
1144 **attached KMTs**

1145 (A) Graph showing the number of KMTs per kinetochore for each data set and the average number for all  
1146 data sets (mean  $\pm$  STD indicated by error bars). (B) Schematic illustration of the indirect measurement of

1147 the k-fiber area. MTs (red lines) with their ends (circles in light red) and the kinetochore (ellipsoid in dark  
1148 red) are shown (right). The measurement of the cross-section of a k-fiber in the vicinity of the KMT ends is  
1149 indicated by a blue bar (left). The k-fiber area is given by a circle (blue) enclosing all KMTs (circle  
1150 reaching to the middle of the peripheral KMTs). **(C)** Graph showing the number of KMTs per kinetochore  
1151 for all reconstructed spindles plotted against the area of k-fibers at the kinetochore ( $n = 292$ ). The ellipse  
1152 (gray) indicates a 95% confidence interval for all data and the central dot (gray) indicates the average  
1153 kinetochore area. **(D)** Graph showing the density of KMTs at the kinetochore for each 3D reconstruction  
1154 and for all data sets (mean  $\pm$  STD indicated by error bars). **(E)** Plot showing the average KMT-to-KMT  
1155 distance at the kinetochore for all data sets (mean  $\pm$  STD indicated by error bars). The average for all  
1156 data sets (mean  $\pm$  STD) is also given.

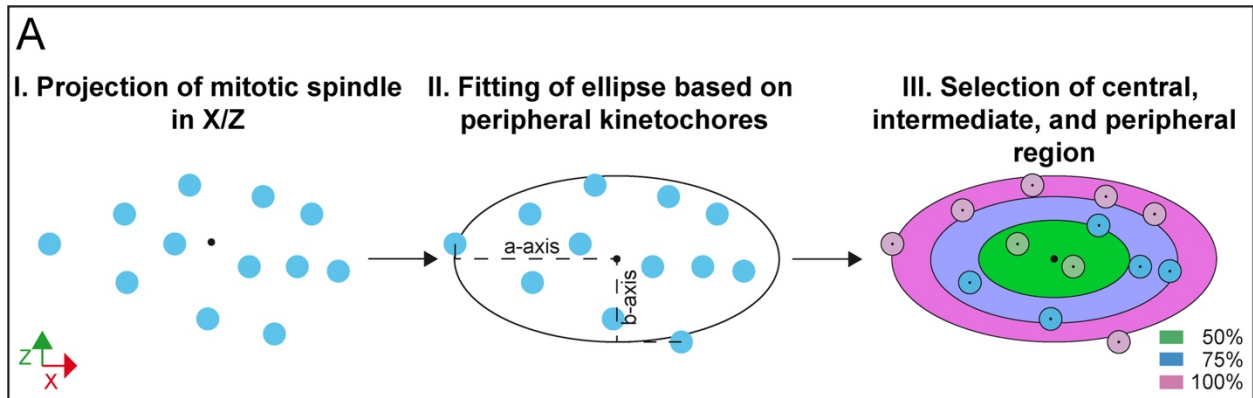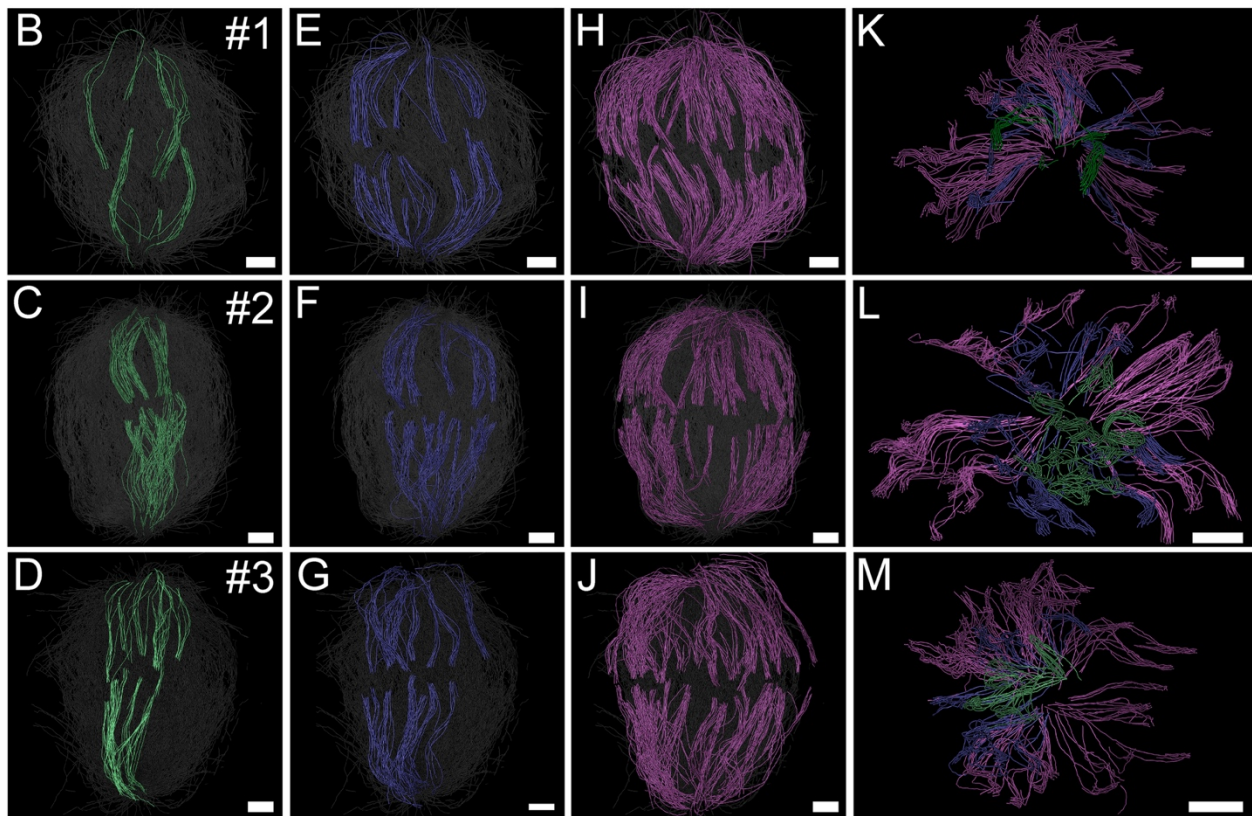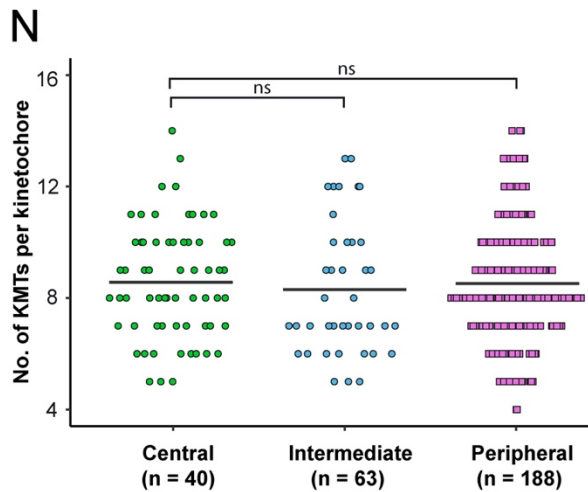



1158 **Figure 3-figure supplement 3. Correlation of KMT number and association with**  
1159 **the spindle poles according to the position of the k-fibers in the mitotic spindles**

1160 **(A)** Schematic illustration of the k-fiber positions on the X/Z projection of the metaphase plate.  
1161 Kinetochores are indicated as blue circles. The fitted ellipse (center marked by a black dot) including all  
1162 kinetochores is characterized by the semi-major (a-) and the semi-minor (b-) axis. The ellipse is divided  
1163 into three areas representing the percentage of occupancy on the ellipse (0-50%, central kinetochores,  
1164 green; 50-75%, intermediate kinetochores, blue; and 75-100%, peripheral kinetochores, purple). **(B-D)**  
1165 Perspective views of the reconstructed spindles with selected central k-fibers (green). The numbers of the  
1166 spindles are indicated in the upper right corners. **(E-G)** Perspective views with selected intermediate k-  
1167 fibers (blue). **(H-J)** Perspective views with selected peripheral k-fibers (purple). **(K-M)** Cross-section views  
1168 of the spindles with all k-fiber classes. **(N)** Plot showing the number of KMTs per kinetochore according to  
1169 the three positional regions in the mitotic spindle for all data sets. The mean of the KMT number is  
1170 indicated. A Student's t-test was applied for statistical analysis (mean values indicated by error bars).  
1171 Scale bars, 1  $\mu\text{m}$ .

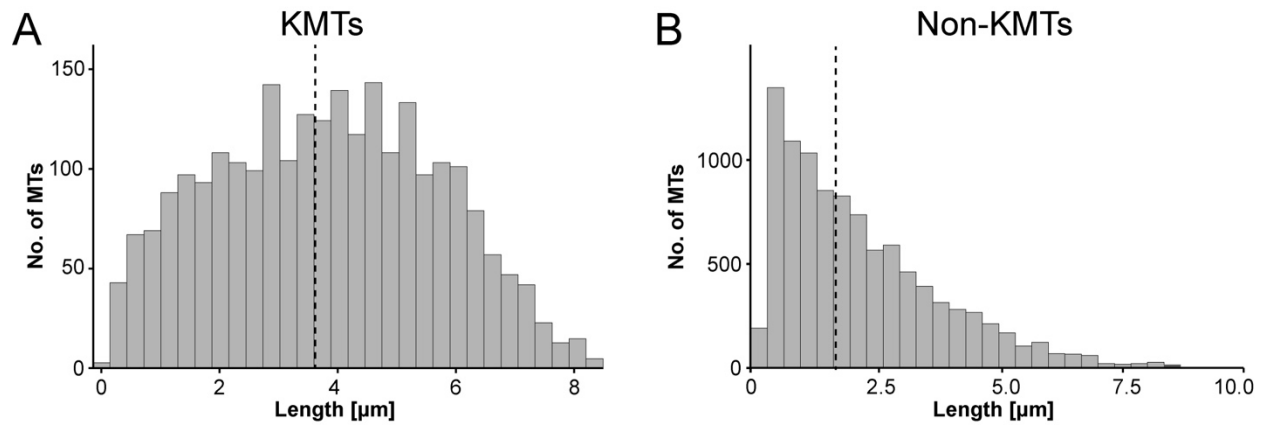

1172

1173 **Figure 4. Analysis of MT length distribution**

1174 (A) Histogram showing the length distribution of KMTs from all data sets (n = 2580). The dashed line  
1175 indicates the average length of KMTs. (B) Histogram showing the length distribution of non-KMTs (n =  
1176 9957). The dashed line indicates the average length of non-KMTs.

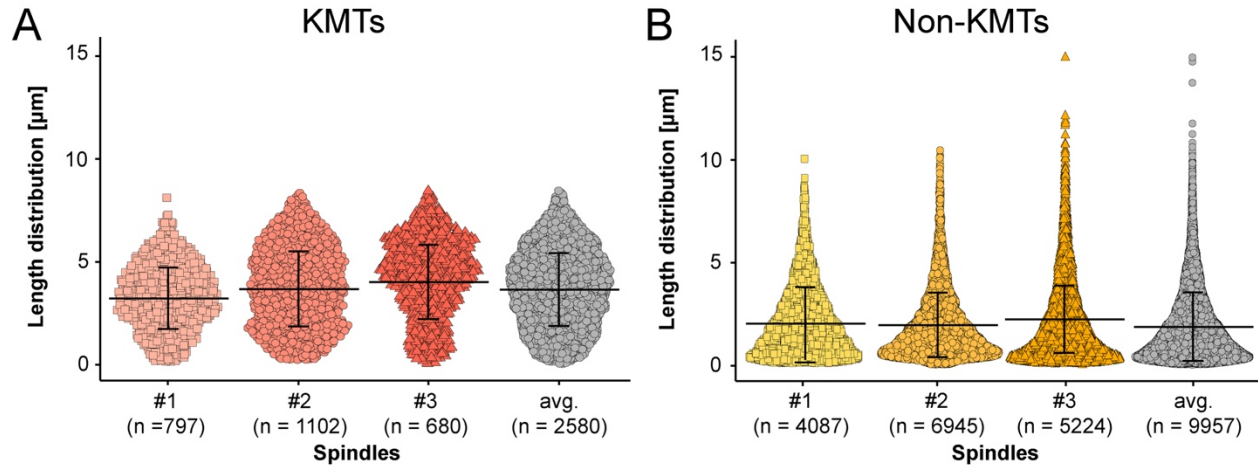

1177

1178 **Figure 4-figure supplement 1. Length distribution of KMTs and non-KMTs**

1179 (A) Beeswarm plot showing the length distribution of KMTs in the individual data sets. The average of all  
1180 data sets is also given. The plots show the mean  $\pm$  STD indicated by the error bar. (B) Beeswarm plot  
1181 showing the length distribution of non-KMTs in the individual data sets. The average of all data sets is  
1182 also given. The plots show the mean  $\pm$  STD indicated by the error bars.

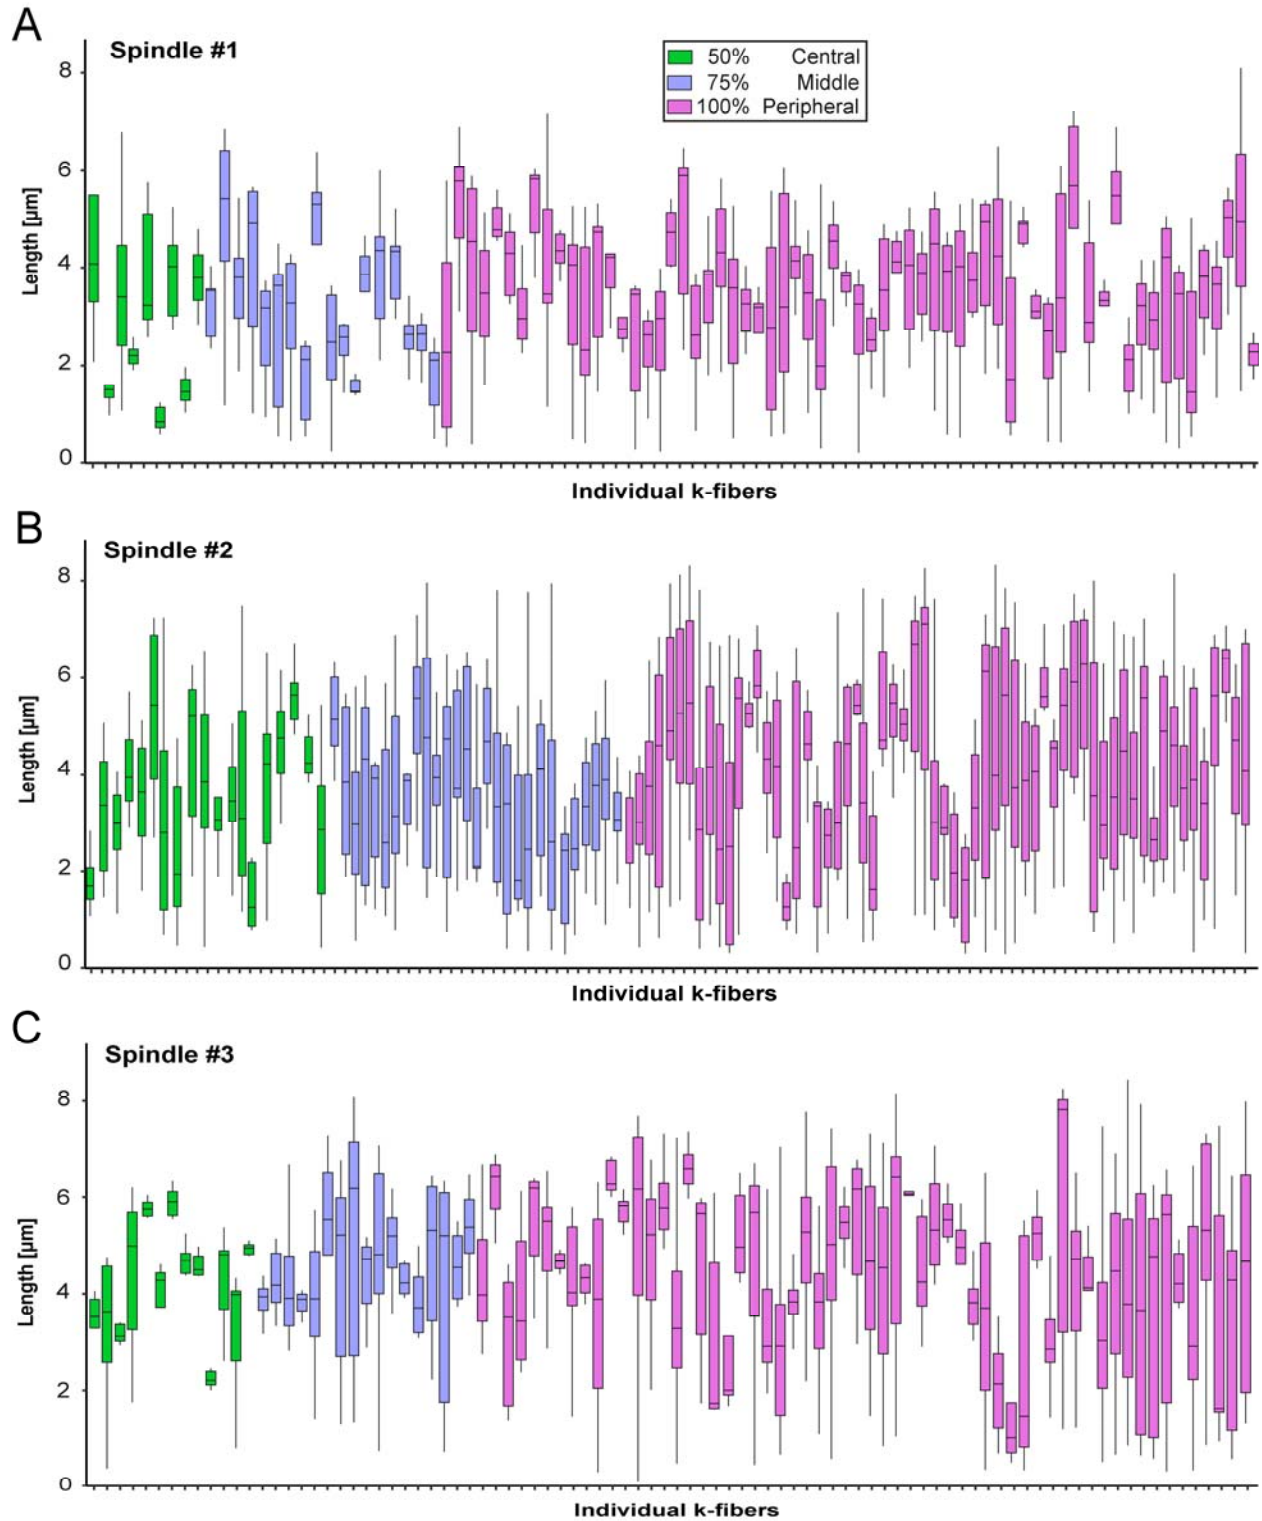

1183

1184 **Figure 4-figure supplement 2. KMT length distribution based on the k-fiber**

1185 **position in the spindle**

1186 **(A)** Box plot showing the length distribution of KMTs in individual k-fibers as observed in spindle #1 (n =  
1187 98). The k-fibers are displayed and color-coded according to their position within the spindle. Each bar  
1188 shows the mean  $\pm$  STD indicated by error bars. **(B)** KMT length distribution in spindle #2 (n = 110). **(C)**  
1189 KMT length distribution in spindle #3 (n = 90).

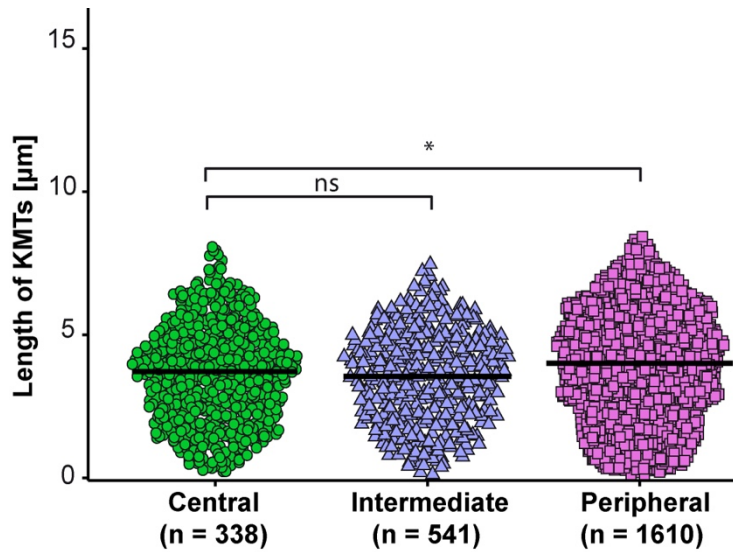

**Figure 4-figure supplement 3. KMT length distribution based on position within the spindle for individual k-fiber**

Beeswarm plot showing the length distribution of KMTs in the average of all data sets based on the k-fiber position in the spindle. The plots show the mean indicated by black bar. The statistical significance ( $p < 0.001$ ) was calculated with a Student's t-test. The mean values are also indicated by error bars.

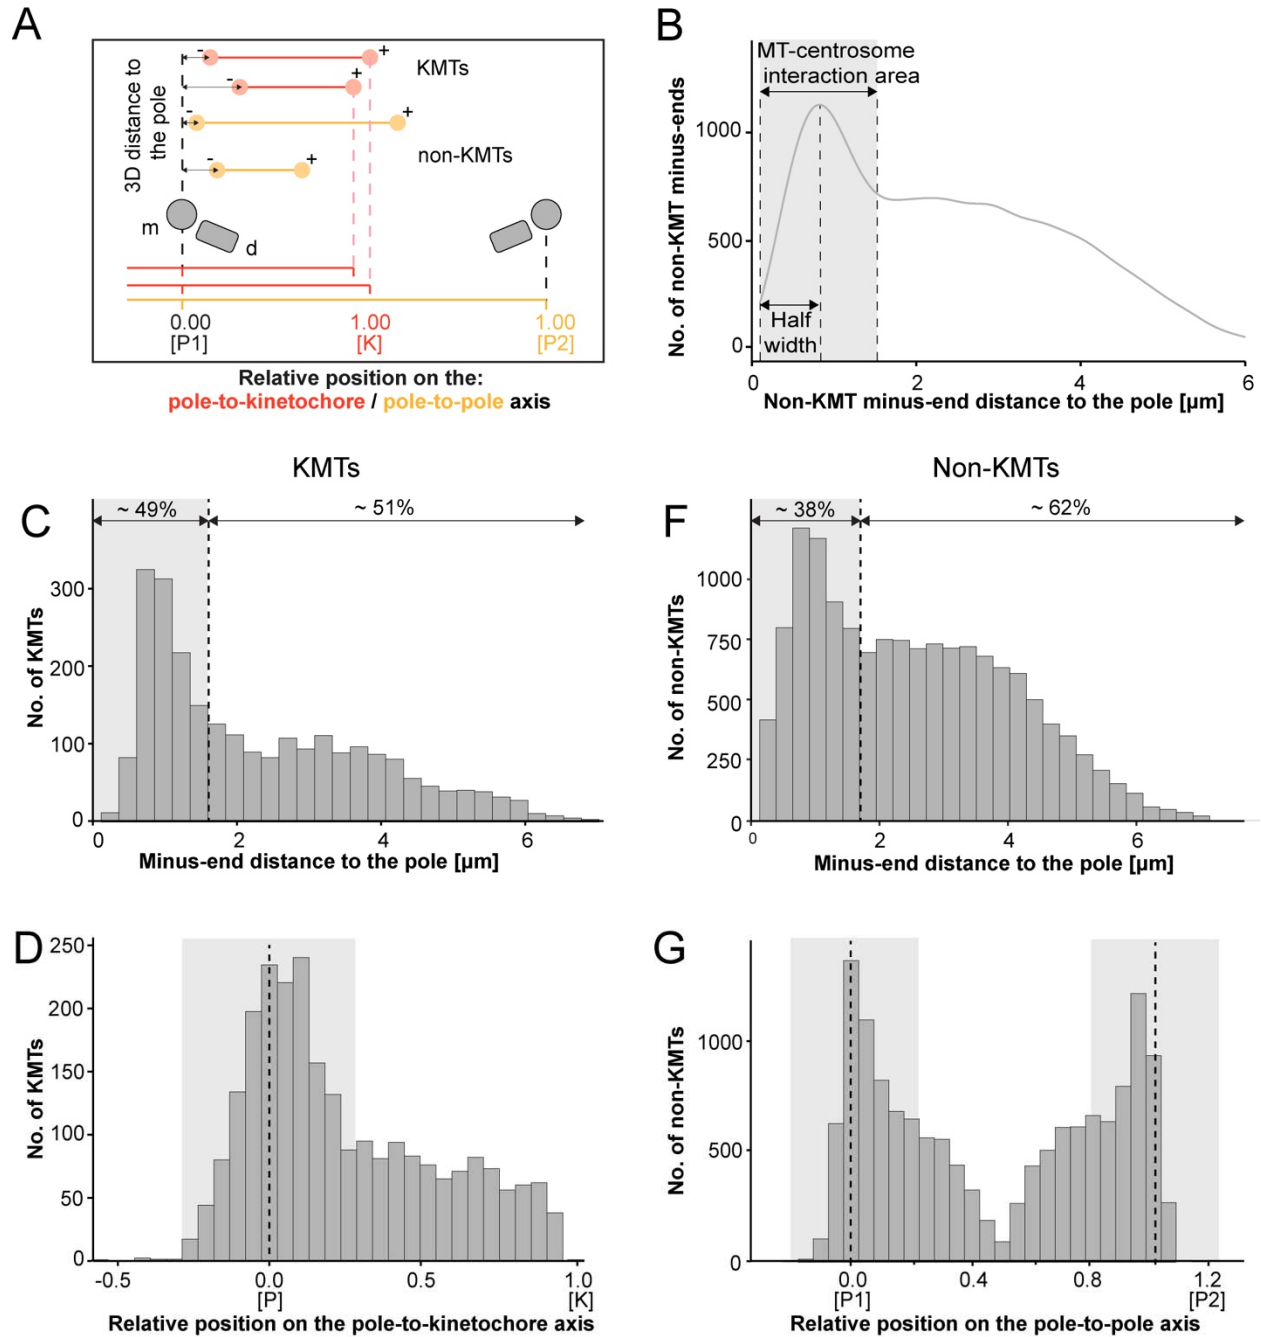

1196

1197 **Figure 5. Analysis of MT minus ends**

1198 (A) Measurement of MT minus-end positioning. A KMT (red line) with its ends (red circles) and a non-  
 1199 KMT (yellow line) with its ends (yellow circles) are shown. The distance of both the KMT and the non-  
 1200 KMT minus ends to the center of the mother centriole was calculated. The relative position of the KMT  
 1201 minus ends along the pole-to-kinetochore axis and the non-KMT minus ends along the pole-to-pole axis  
 1202 was also determined (P1 – pole 1; P2 – pole 2; K – kinetochore). (B) Determination of the MT-  
 1203 centrosome interaction area. Graph showing the number of non-KMT minus ends plotted against their



1204 distance to the pole (i.e., to the center of the mother centriole). The determined area of the interaction of  
1205 non-KMTs with the centrosome and the half-width of this area is indicated in gray. The border of the MT-  
1206 centrosome interaction area (right dashed line) was determined by identifying the half-width of a peak of  
1207 minus-end distance distribution. **(C)** Histogram showing the distribution of the KMT minus-end distances  
1208 to the center of the mother centriole (n = 2580). The MT-centrosome interaction area as defined in B is  
1209 indicated by a gray area (dashed line shows the border of this area). **(D)** Histogram showing the relative  
1210 position of the KMT minus ends on the pole-to-kinetochore axis (n = 2580). The position of the spindle  
1211 pole (P=0, dashed line) and the kinetochore (K=1) is indicated. The MT-centrosome interaction area is  
1212 indicated in gray. **(F)** Histogram showing the distribution of the non-KMT minus-end distances to the  
1213 center of the mother centriole (n = 9957). **(G)** Plot showing the relative position of the non-KMT minus  
1214 ends on the pole-to-pole axis. The position of the spindle poles (P1=0, P2=1) is indicated (n = 9957). The  
1215 MT-centrosome interaction area is indicated in gray.

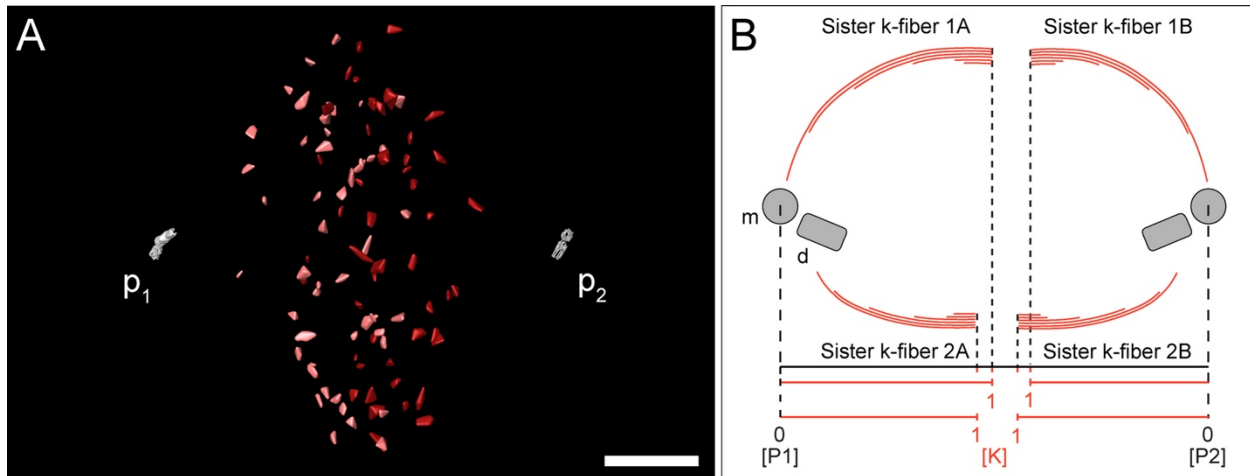

1216

1217 **Figure 5-figure supplement 1. Normalization of minus-end positioning on the**  
1218 **pole-to-kinetochore axis**

1219 (A) Three-dimensional model of the kinetochores visualized in spindle #1. For each kinetochore pair,  
1220 each kinetochore is assigned to the closest spindle pole ( $p_1$ , left pole, kinetochores in light red;  
1221  $p_2$ , right pole, kinetochores in dark red). (B) Schematic drawing illustrating the normalization of KMT ends  
1222 positioning (pole position, P1 and P2 = 0; kinetochore position = 1). End positioning is then determined  
1223 between positions 0 and 1 for each k-fiber.

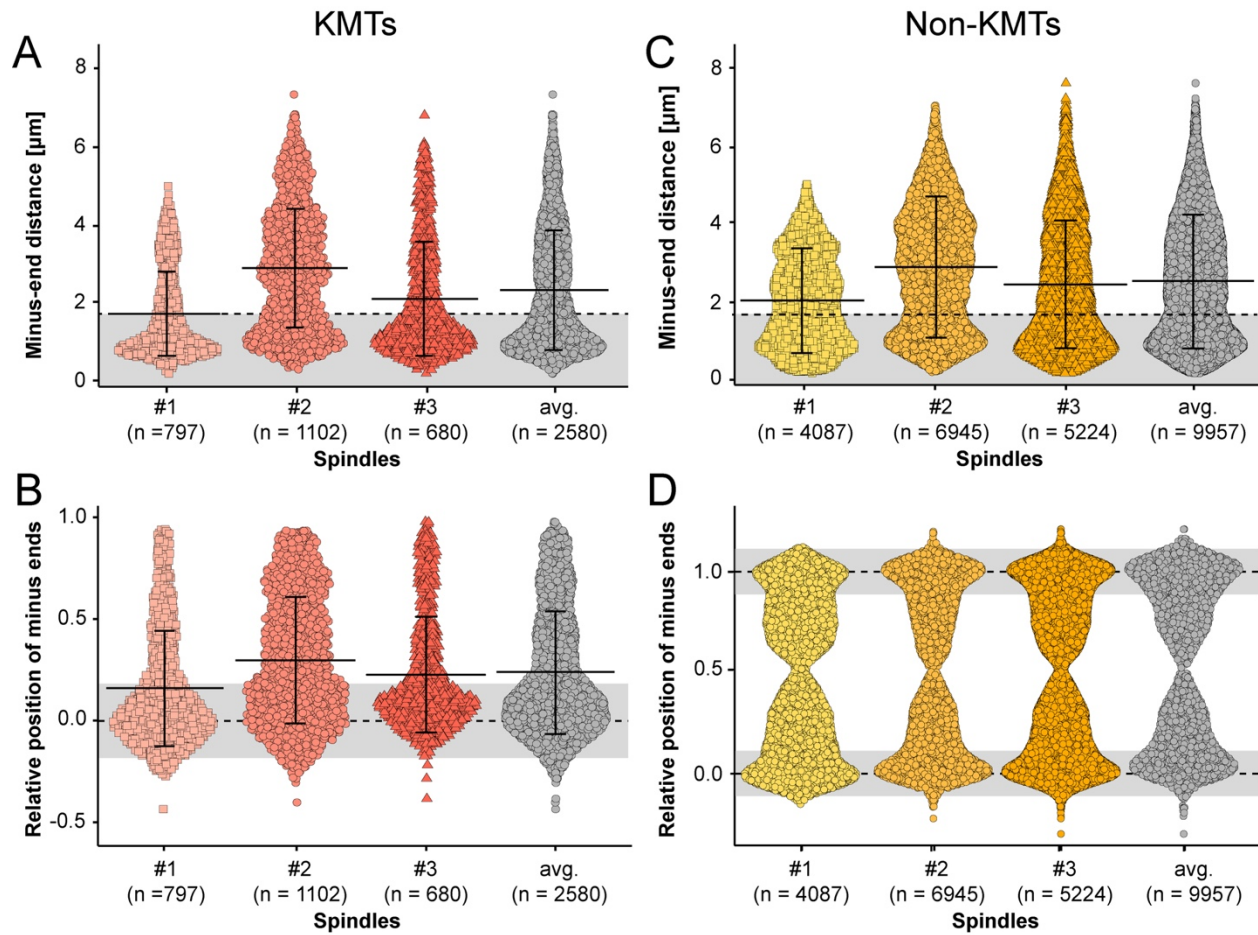

1224

1225 **Figure 5-figure supplement 2. Minus-end distribution of KMTs and non-KMTs**

1226 (A) Beeswarm plot showing the distribution of KMT minus-end distances to the center of the mother  
1227 centrioles. The MT-centrosome interaction area is indicated in gray (mean  $\pm$  STD indicated by error bars).  
1228 (B) Plot showing the distribution of relative positioning of the KMT minus ends on the pole-to-kinetochore  
1229 axis (position of the pole, P=0; the position of the kinetochore = 1; mean  $\pm$  STD indicated by error bars).  
1230 (C) Distribution of the distances of the non-KMT minus ends to the center of the mother centriole (mean  $\pm$   
1231 STD indicated by error bars). (D) Distribution of relative positioning of the non-KMT minus ends on the  
1232 pole-to-kinetochore axis.

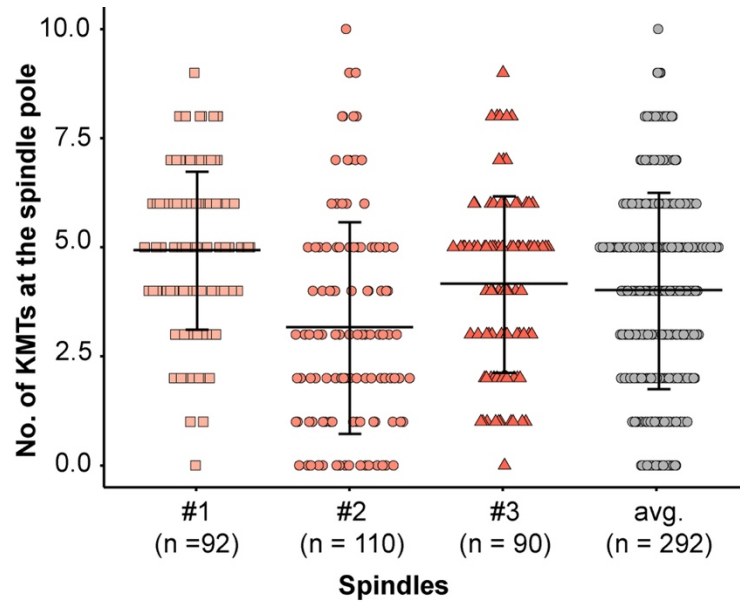

1233

1234 **Figure 5-figure supplement 3. K-fiber analysis of KMT minus ends reaching the**  
1235 **pole**

1236 Plot showing the number of KMT minus ends per k-fiber at the spindle pole for each data set and the  
1237 average number for all data sets (mean  $\pm$  STD indicated by error bars).

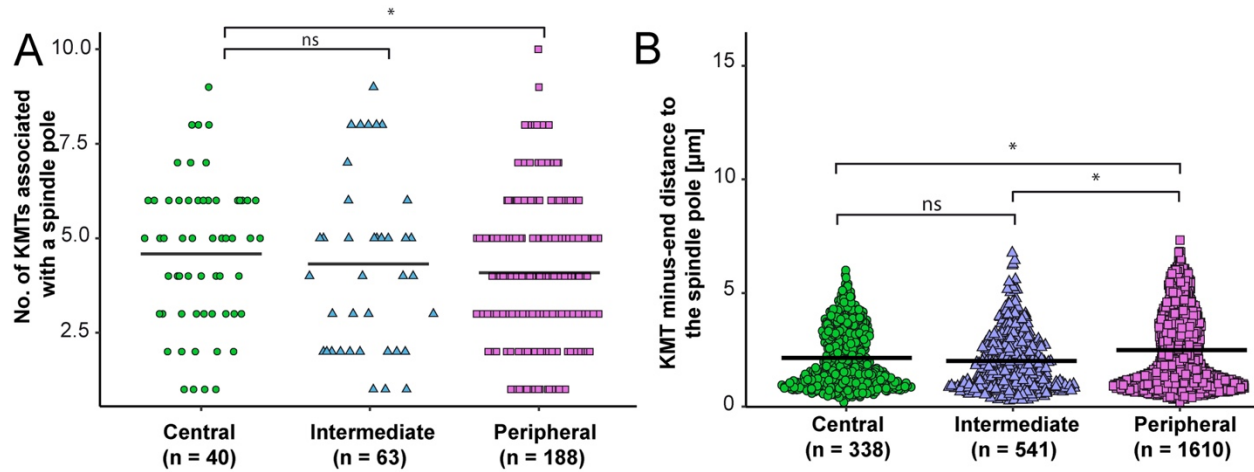

1238

1239 **Figure 5-figure supplement 4. KMT minus-end distribution based on the k-fiber**  
1240 **position in the spindle**

1241 (A) Plot showing the number of KMTs in each k-fiber associated with the spindle poles for the three  
1242 positional regions in the mitotic spindle for all data sets. The mean values are indicated. (B) Beeswarm  
1243 plot showing number of KMT minus-end associated with the center of the mother centrioles for each k-  
1244 fiber. The mean value was indicated with error bars. The statistical significance ( $p < 0.001$ ) was calculated  
1245 with a Student's t-test.

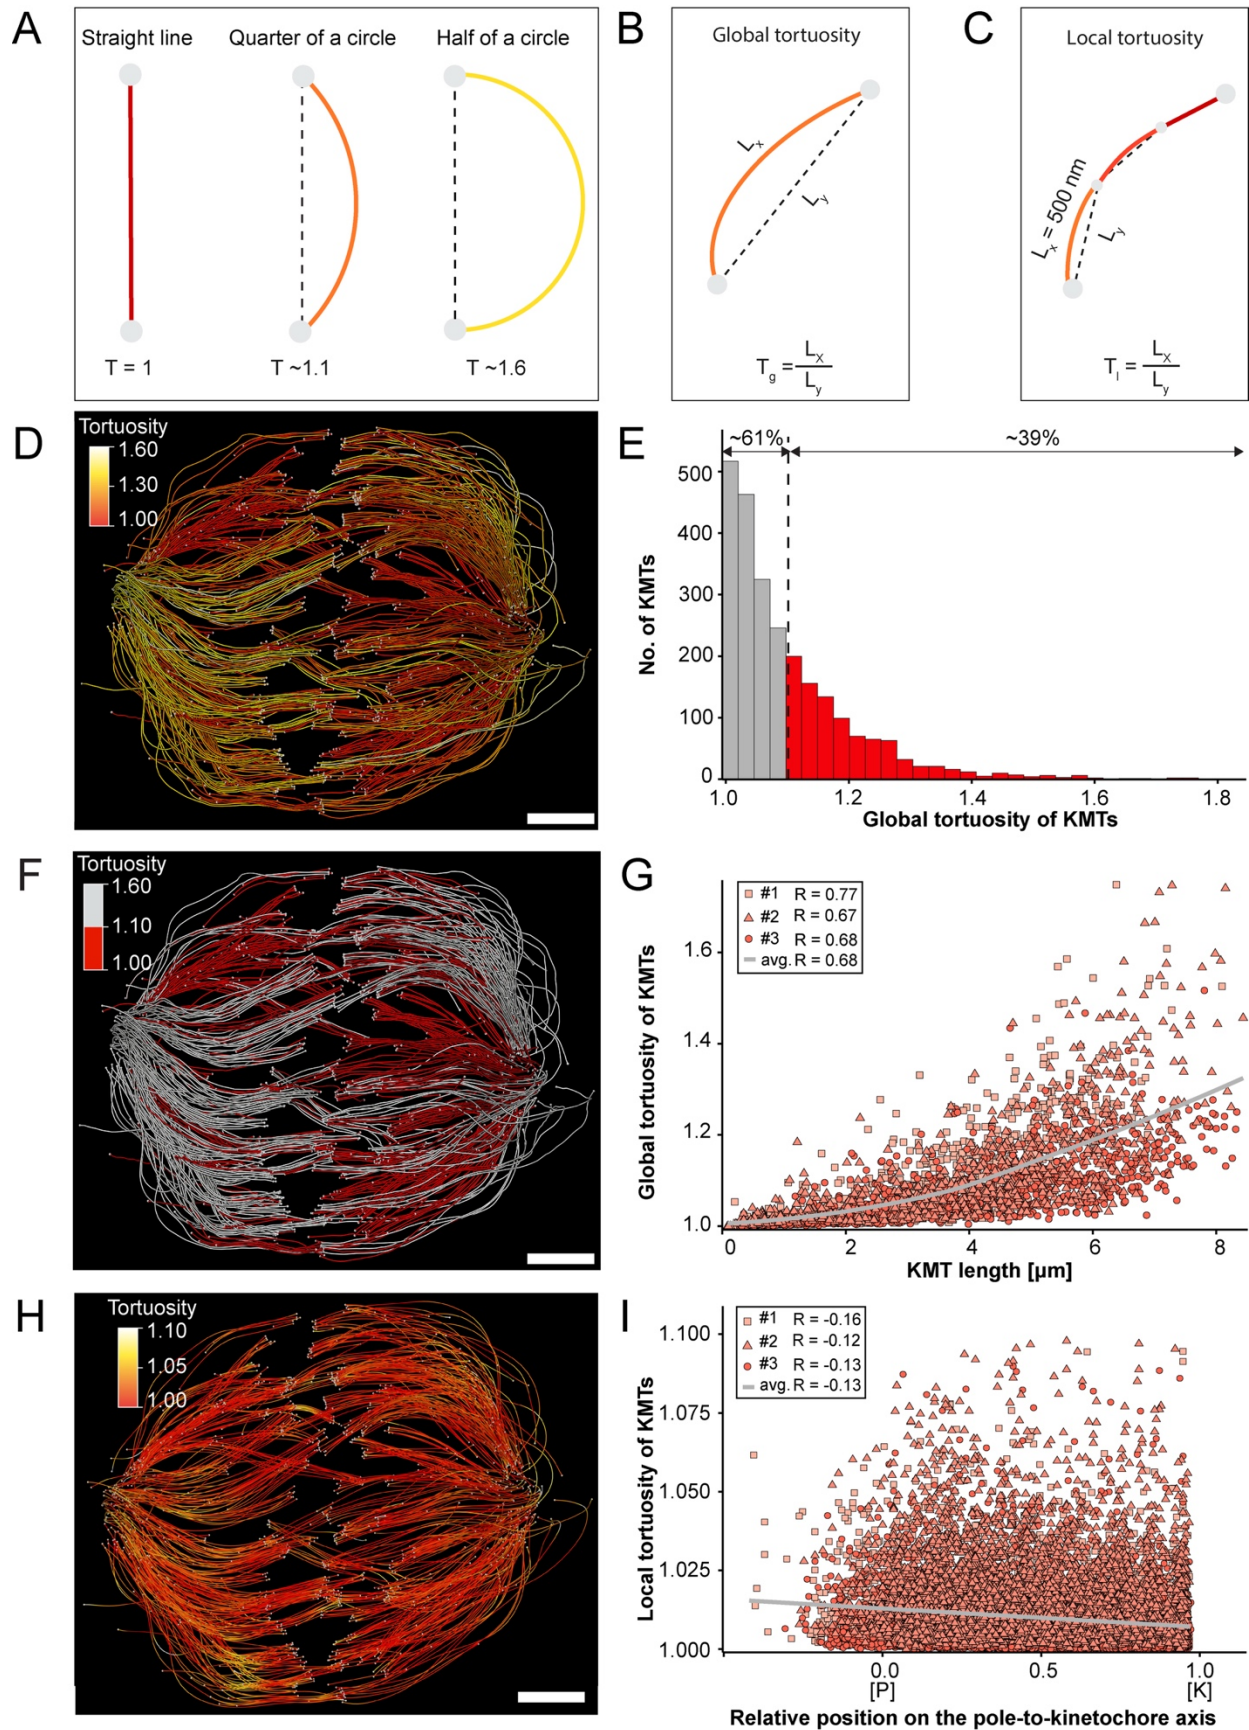



1247 **Figure 6. Global and local tortuosity of KMTs**

1248 (A) Schematic illustration of tortuosity ( $T$ ) as given for a straight line, a quarter of a circle, and a half of a  
1249 circle. (B) Schematic illustration of global tortuosity ( $T_g$ ) of KMTs given by the ratio of the spline length ( $L_x$ )  
1250 to the 3D Euclidean distance between the KMT ends illustrated by gray dots ( $L_y$ ). (C) Schematic  
1251 illustration of KMT local tortuosity ( $T_l$ ) as given by division segments with a length of 500 nm. (D) Three-  
1252 dimensional model of k-fibers (spindle #1) showing the global tortuosity of KMTs as indicated by color  
1253 coding (top left corner). (E) Histogram showing the frequency of different degrees of KMT tortuosity ( $n =$   
1254 2580). A tortuosity of 1.1 is length. The Pearson's correlation coefficient is given for each reconstructed  
1255 spindle. The gray line indicates indicated by a dashed line. (F) Perspective view as shown in D. Straight  
1256 KMTs (tortuosity of 1.0 - 1.1, red) and curved KMTs (tortuosity  $\geq 1.1$ , white) are highlighted. (G)  
1257 Correlation of global tortuosity and KMT length ( $n = 2580$ ). The Pearson's correlation coefficient is given  
1258 for each reconstructed spindle. The gray line indicates the local regression calculated by the loess  
1259 method. (H) Three-dimensional model of k-fibers (from spindle #1) showing the local tortuosity of KMTs  
1260 as indicated by color-coding. (I) Correlation of the local tortuosity of KMTs with the relative position along  
1261 the pole (P)-to-kinetochore (K) axis ( $n = 2580$ ). Scale bars, 1  $\mu\text{m}$ .



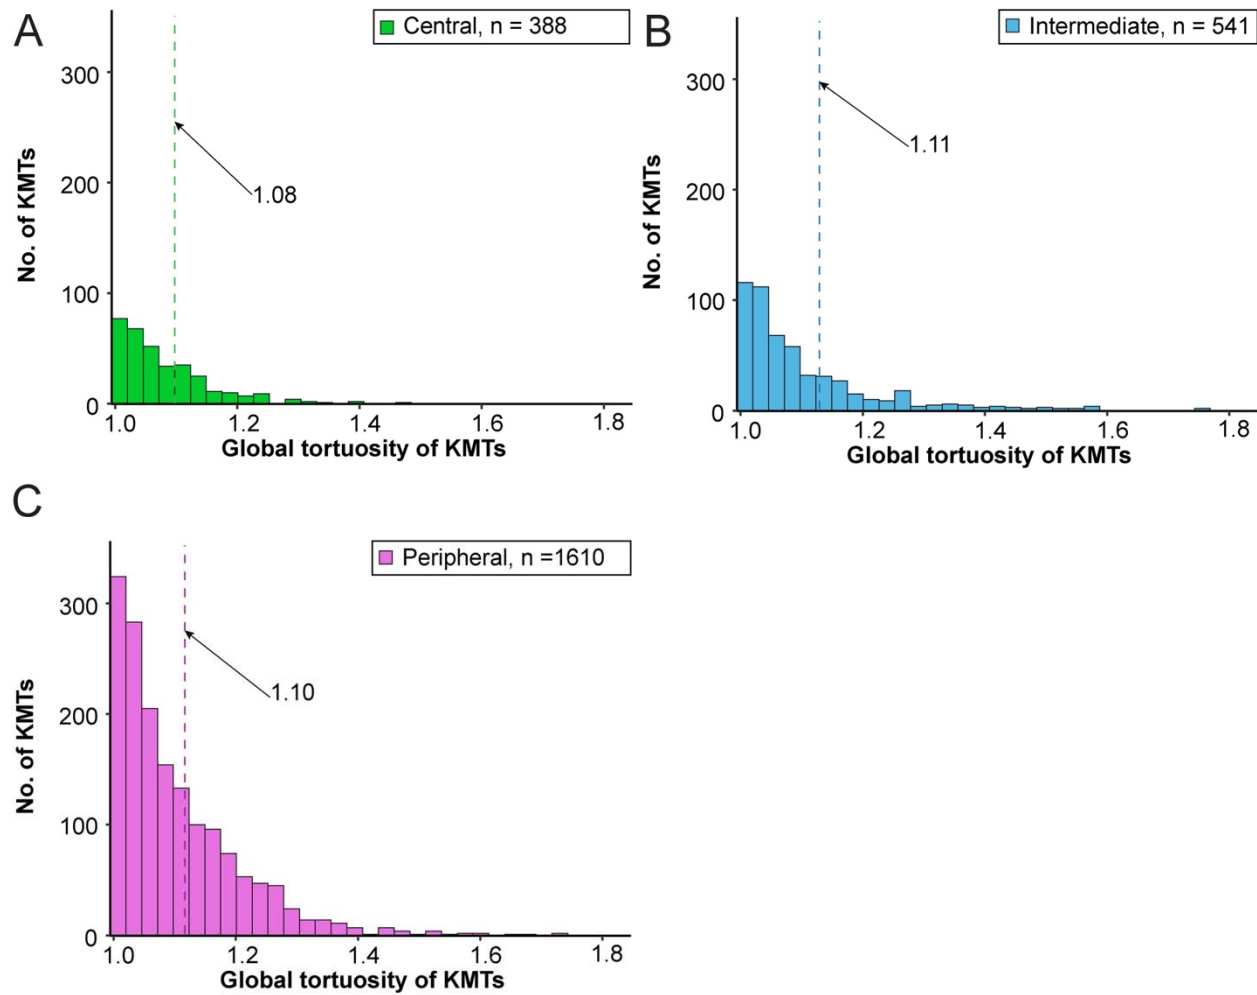

1262

1263 **Figure 6-figure supplement 1. Global tortuosity of KMTs according to k-fiber**  
1264 **positioning in the spindle**

1265 (A) Histogram showing the number of central KMTs plotted against the global tortuosity (n = 338). (B)  
1266 Histogram showing intermediate KMTs (n = 541). (C) Histogram showing peripheral KMTs. The mean  
1267 global tortuosity of each k-fiber position is indicated by a dashed line (n = 1610).

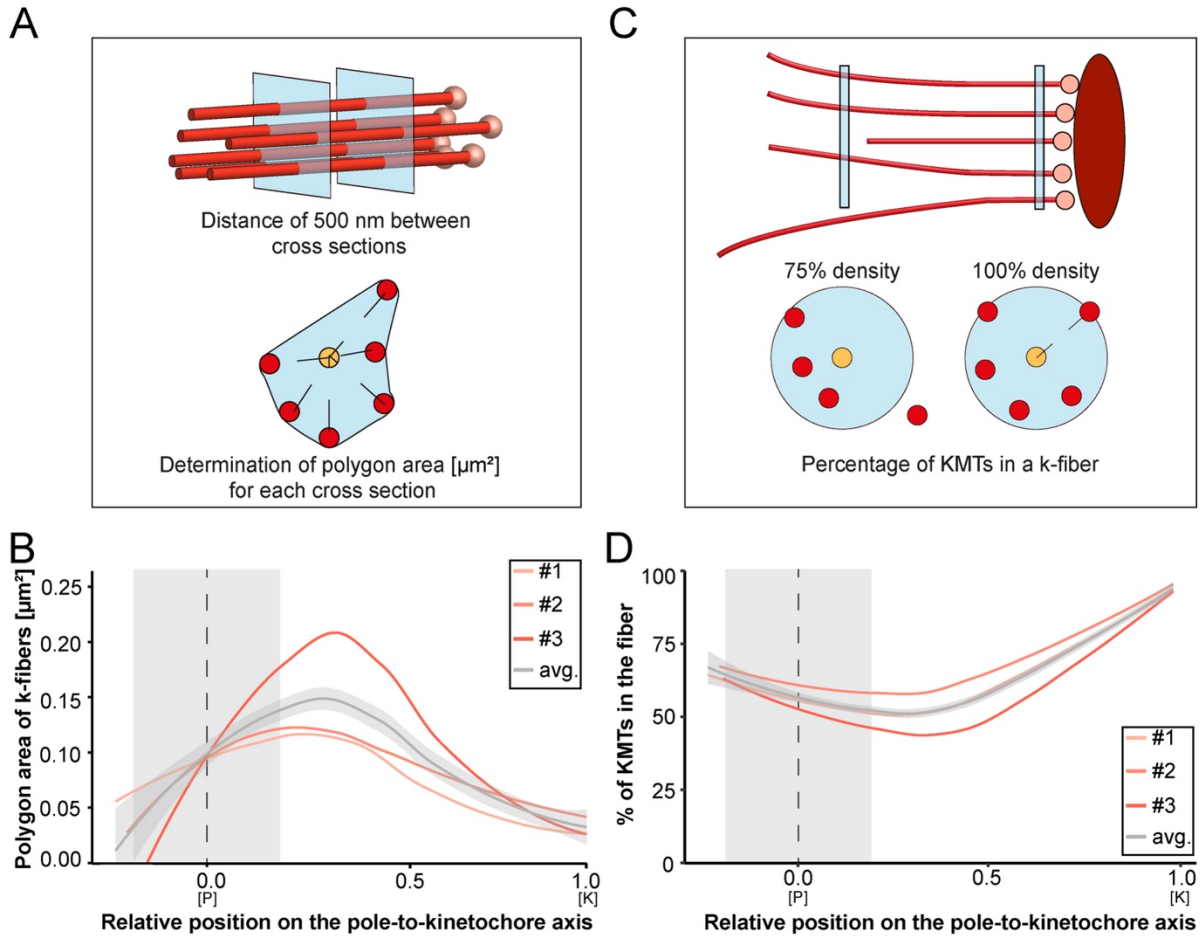

1268

## 1269 Figure 7. Shape of k-fibers

1270 (A) Schematic illustration of the analysis of polygonal areas as obtained from k-fiber cross-sections.  
1271 KMTs are shown in red, KMT ends as red spheres. The cross-section of the given k-fiber is shown as a  
1272 blue square and the median position of all KMTs in the cross-section as a yellow circle. (B) Distribution of  
1273 the k-fiber polygonal area along with the relative position on the pole [P]-to-kinetochore [K] axis ( $n = 292$ ).  
1274 (C) Schematic illustration of the k-fiber density analysis. For each k-fiber, a radius at the kinetochore was  
1275 estimated by calculating a minimum circle enclosing all KMTs. The determined radius was then enlarged  
1276 by factor 2 to account for k-fiber flexibility. Along with the k-fiber, the number of KMTs enclosed in the  
1277 selected radius was then measured. (D) Distribution of the KMT enclosed in the k-fiber along with the  
1278 relative position along the pole [P]-to-kinetochore [K] axis ( $n = 292$ ). For each reconstructed spindle, data  
1279 sets are presented as polynomial lines showing local regression calculated with the loess method.  
1280 Average values with standard deviations are shown in gray.

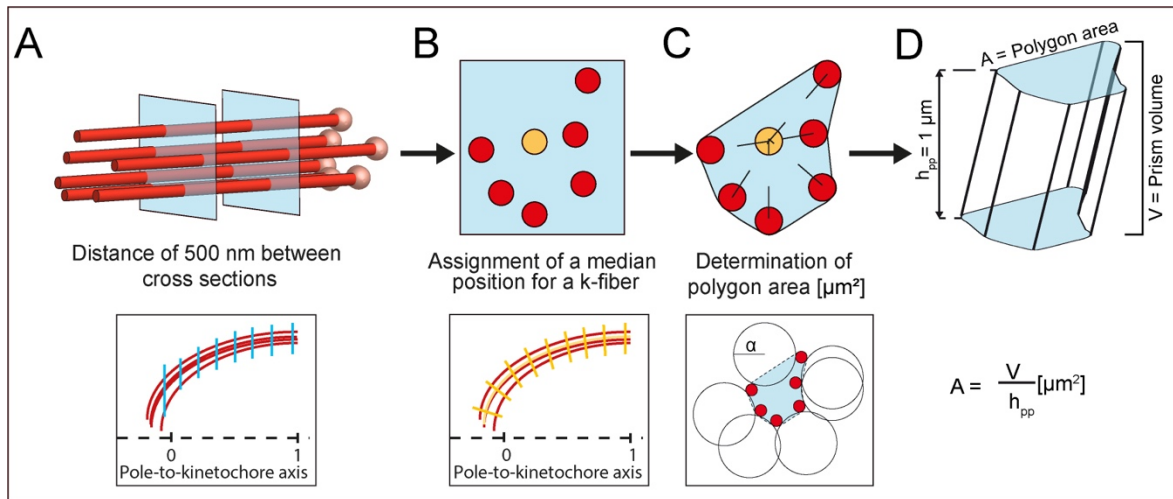

1281

1282 **Figure 7-figure supplement 1. Schematic illustration of the analysis of k-fiber area**  
 1283 **and density**

1284 **(A)** Selection of cross-sections on a k-fiber (KMTs in red, KMT ends, red spheres) every 500 nm (upper  
 1285 row - blue squares; lower row - blue lines). **(B)** Assignment of a median position (upper row - yellow circle;  
 1286 lower row, yellow line) for each cross-section and geometric correction of each cross-section based on  
 1287 the k-fiber's curvature (lower row - yellow short lines). **(C)** Calculation of the polygonal area (upper row).  
 1288 The polygonal area was calculated using the alpha shape algorithm. For each cross-section, circles with  
 1289 a diameter defined by  $\alpha$  (lower row - black lines) were fitted around the 2D projection of KMTs. The  
 1290 polygonal  $\alpha$ -shape was created by drawing lines around KMTs that were at the junction of fitted circles  
 1291 (lower row - black dashed lines). **(D)** Calculation of the polygonal area from the created prism shape. For  
 1292 this, a polygonal area was duplicated and moved in Euclidean space by  $1 \mu\text{m}$  in each dimension to create  
 1293 a prism shape. The polygonal area ( $A$ ) is given by dividing a prism volume [ $\mu\text{m}^3$ ] by a prism height ( $h_{pp} = 1$   
 1294  $\mu\text{m}$ ).

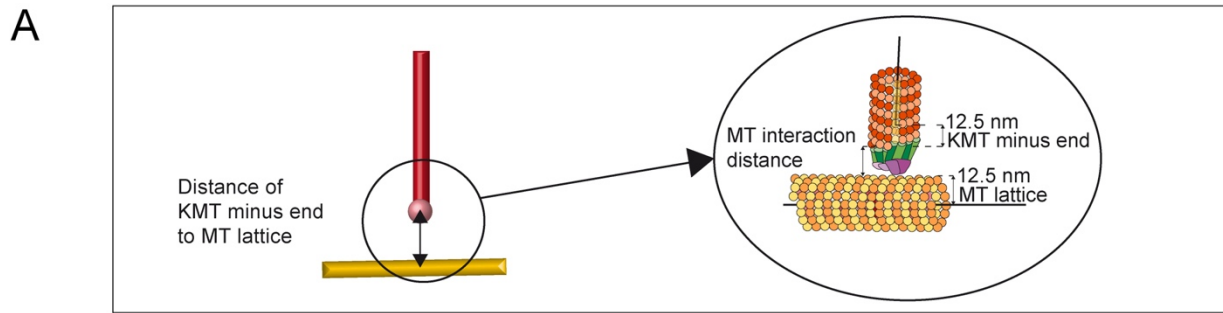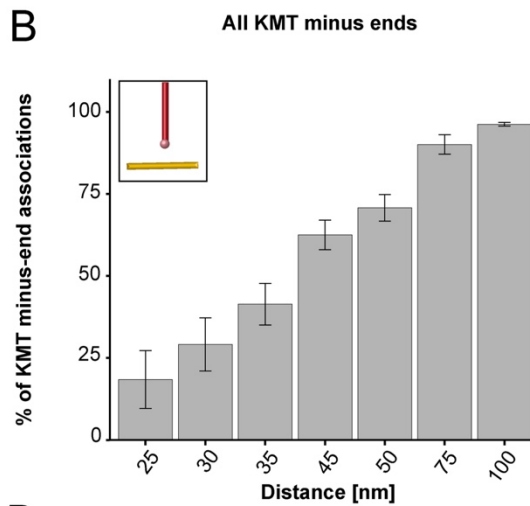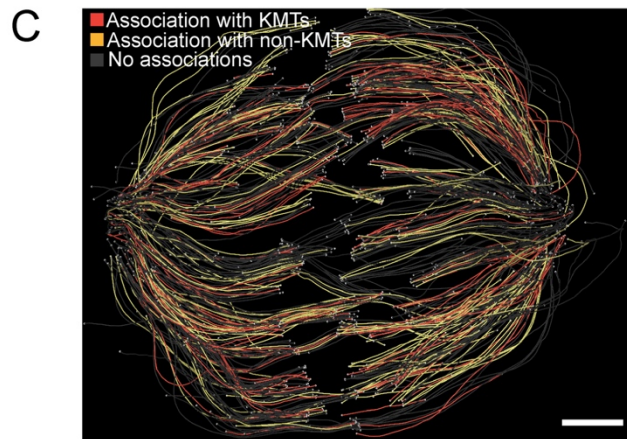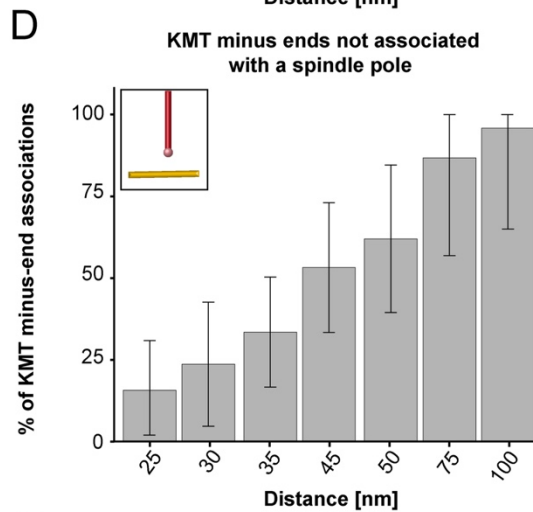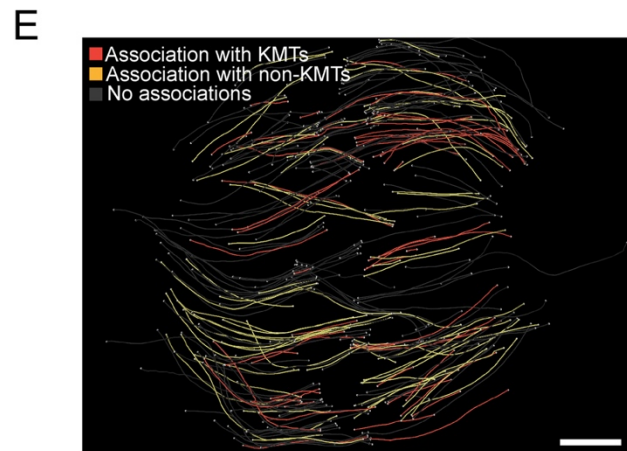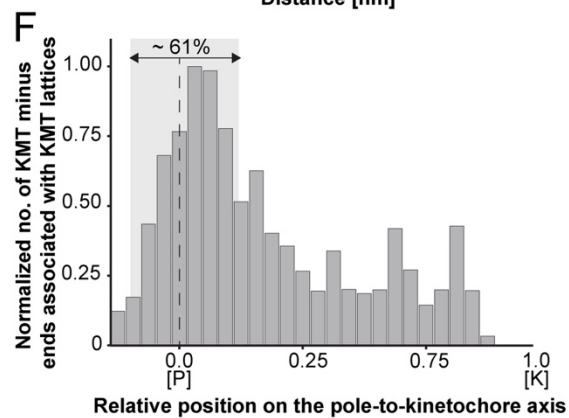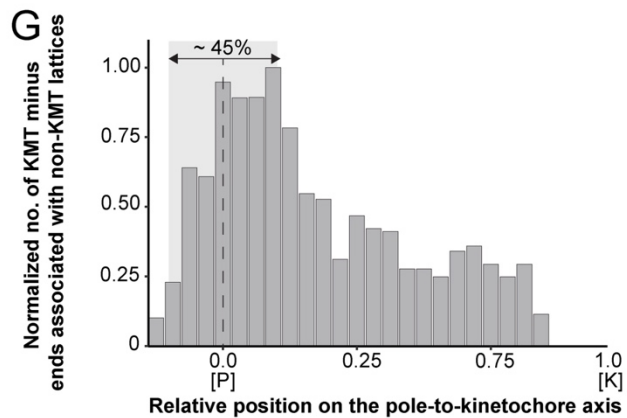

1296 **Figure 8. Association of KMT minus ends with the MT network**

1297 (A) Schematic illustration of the association of KMT minus ends with MT lattices showing a KMT (red line)  
1298 with its minus end (red sphere) located close to the lattice of a non-KMT (yellow line). The distance from a  
1299 KMT minus-end to the center of a non-KMT lattice is estimated. (B) Bar plot showing the percentage of all  
1300 KMT minus ends associated with an MT lattice depending on defined distances of association (25 - 100  
1301 nm; mean  $\pm$  STD indicated by error bars; n = 2580). The standard deviations are given. (C) A 3D model  
1302 showing the interaction pattern of all KMT minus ends associated with MTs based on an interaction  
1303 distance of 35 nm (data obtained from spindle #1). KMTs with their minus ends associated with other  
1304 KMTs are labeled in red, and KMTs with an association with non-KMTs are marked in yellow. KMTs  
1305 without any association with other MTs are shown in gray. (D) Bar plot showing the percentage of KMT  
1306 minus ends not associated with the centrosome interaction area (mean  $\pm$  STD indicated by error bars; n =  
1307 1558). The association with MT lattices is shown in relation to the chosen distance of association. (E)  
1308 Three-dimensional model of KMTs with their minus ends not attached to the centrosome and associated  
1309 with MT lattices. Colors are shown as displayed in the C. (F) Graph showing the number of KMT minus  
1310 ends interacting with KMT lattices within a distance of 35 nm (n = 2580). Numbers of KMT minus ends  
1311 are normalized by the density of surrounding MTs and plotted against the relative position on the pole-to-  
1312 kinetochore axis (P, pole; K, kinetochore). (G) Bar plot showing the normalized number of KMT minus  
1313 ends interacting with non-KMT lattices within 35 nm distance (n = 2580). Scale bars, 1  $\mu$ m.

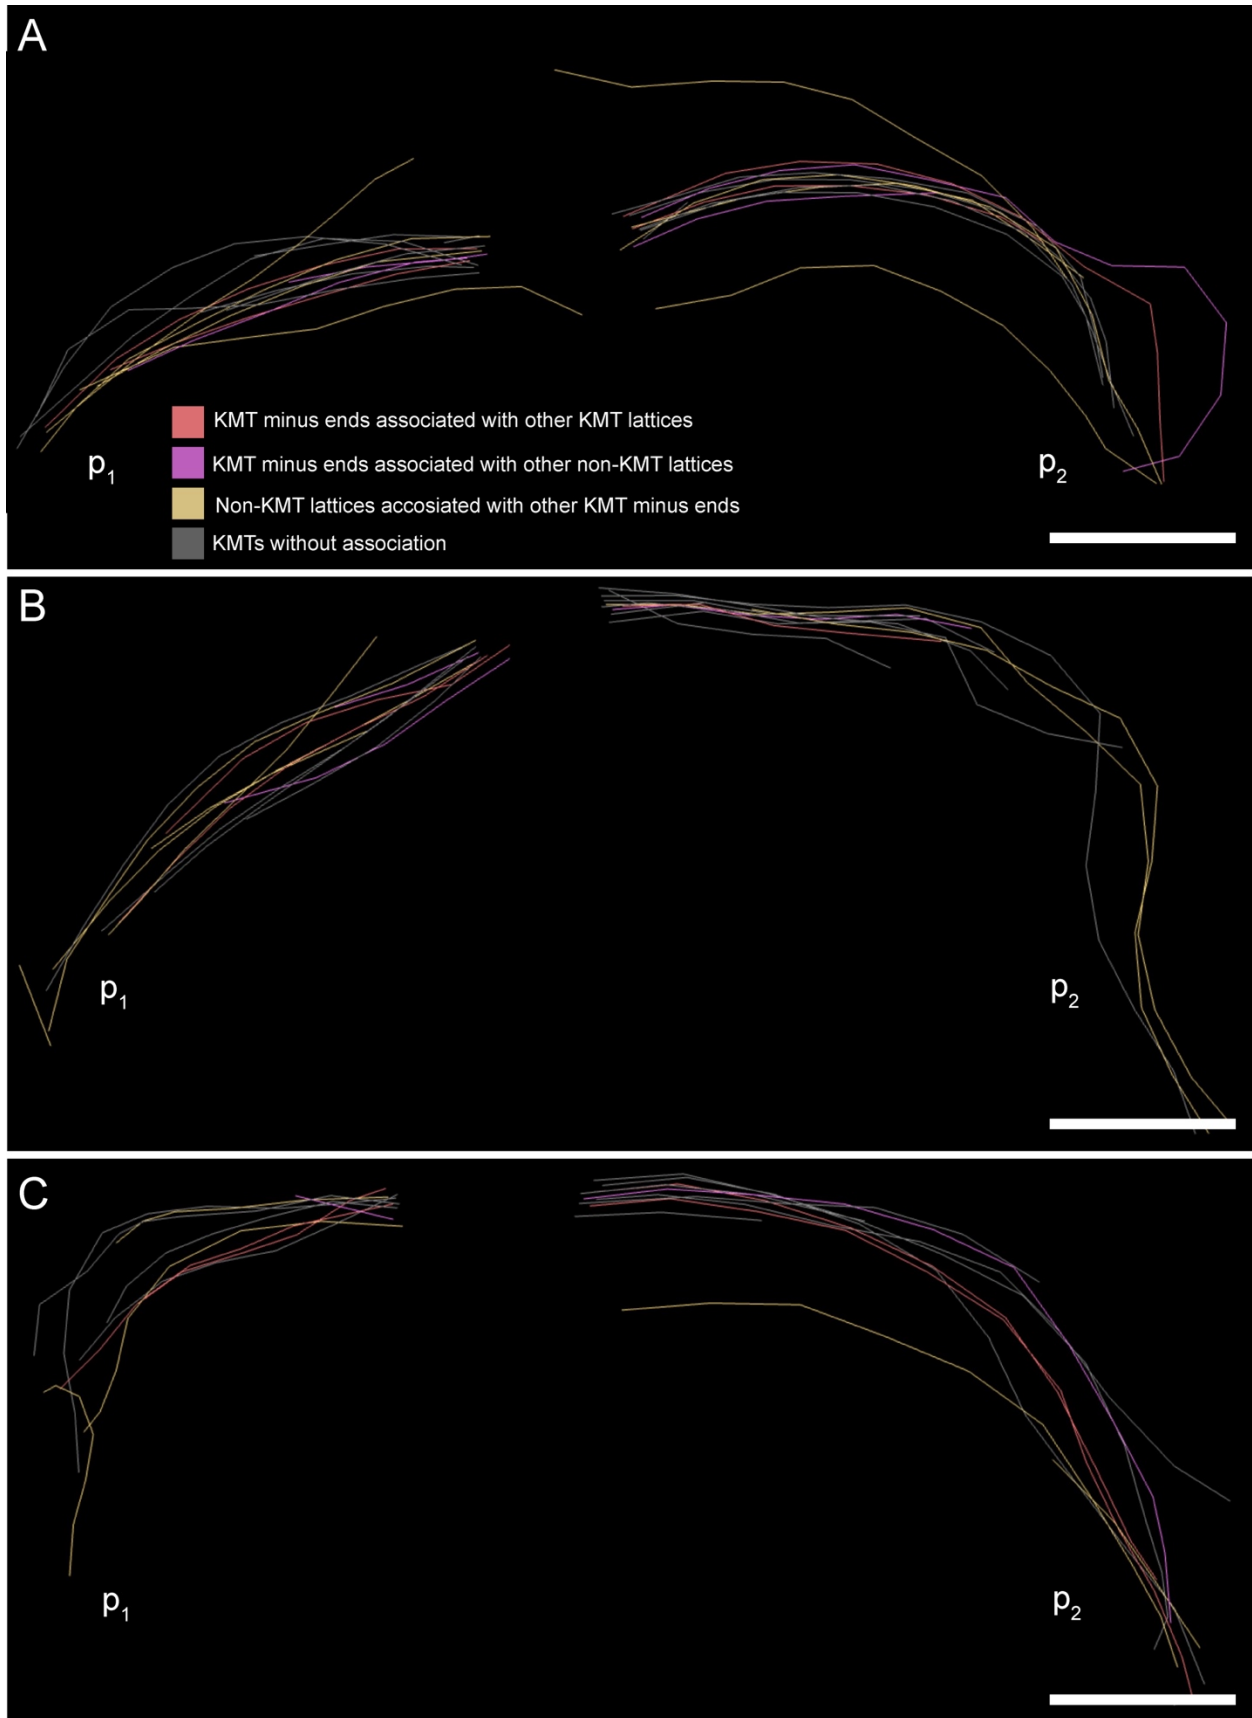



1315 **Figure 8-figure supplement 1. Association of KMT minus ends with KMT and non-**  
1316 **KMT lattices at 35 nm interaction distance**

1317 (A) Visualization of KMTs and non-KMTs obtained from the ASGA 3D-Viewer  
1318 ([https://cfci.shinyapps.io/ASGA\\_3DViewer/](https://cfci.shinyapps.io/ASGA_3DViewer/)) showing a k-fiber pair from spindle #1 (ASGA k-fiber ID:  
1319 pole1\_08). This 3D model illustrates the association of KMT minus ends with MT lattices. The types of  
1320 interaction are shown by color-coding. The association distance is 35 nm. The approximate position of the  
1321 spindle poles ( $p_1$ ,  $p_2$ ) is indicated. (B) Model of k-fiber pair with ID: pole1\_20. (C) Model of k-fiber pair with  
1322 ID: pole1\_23. Scale bars, 1  $\mu\text{m}$ .

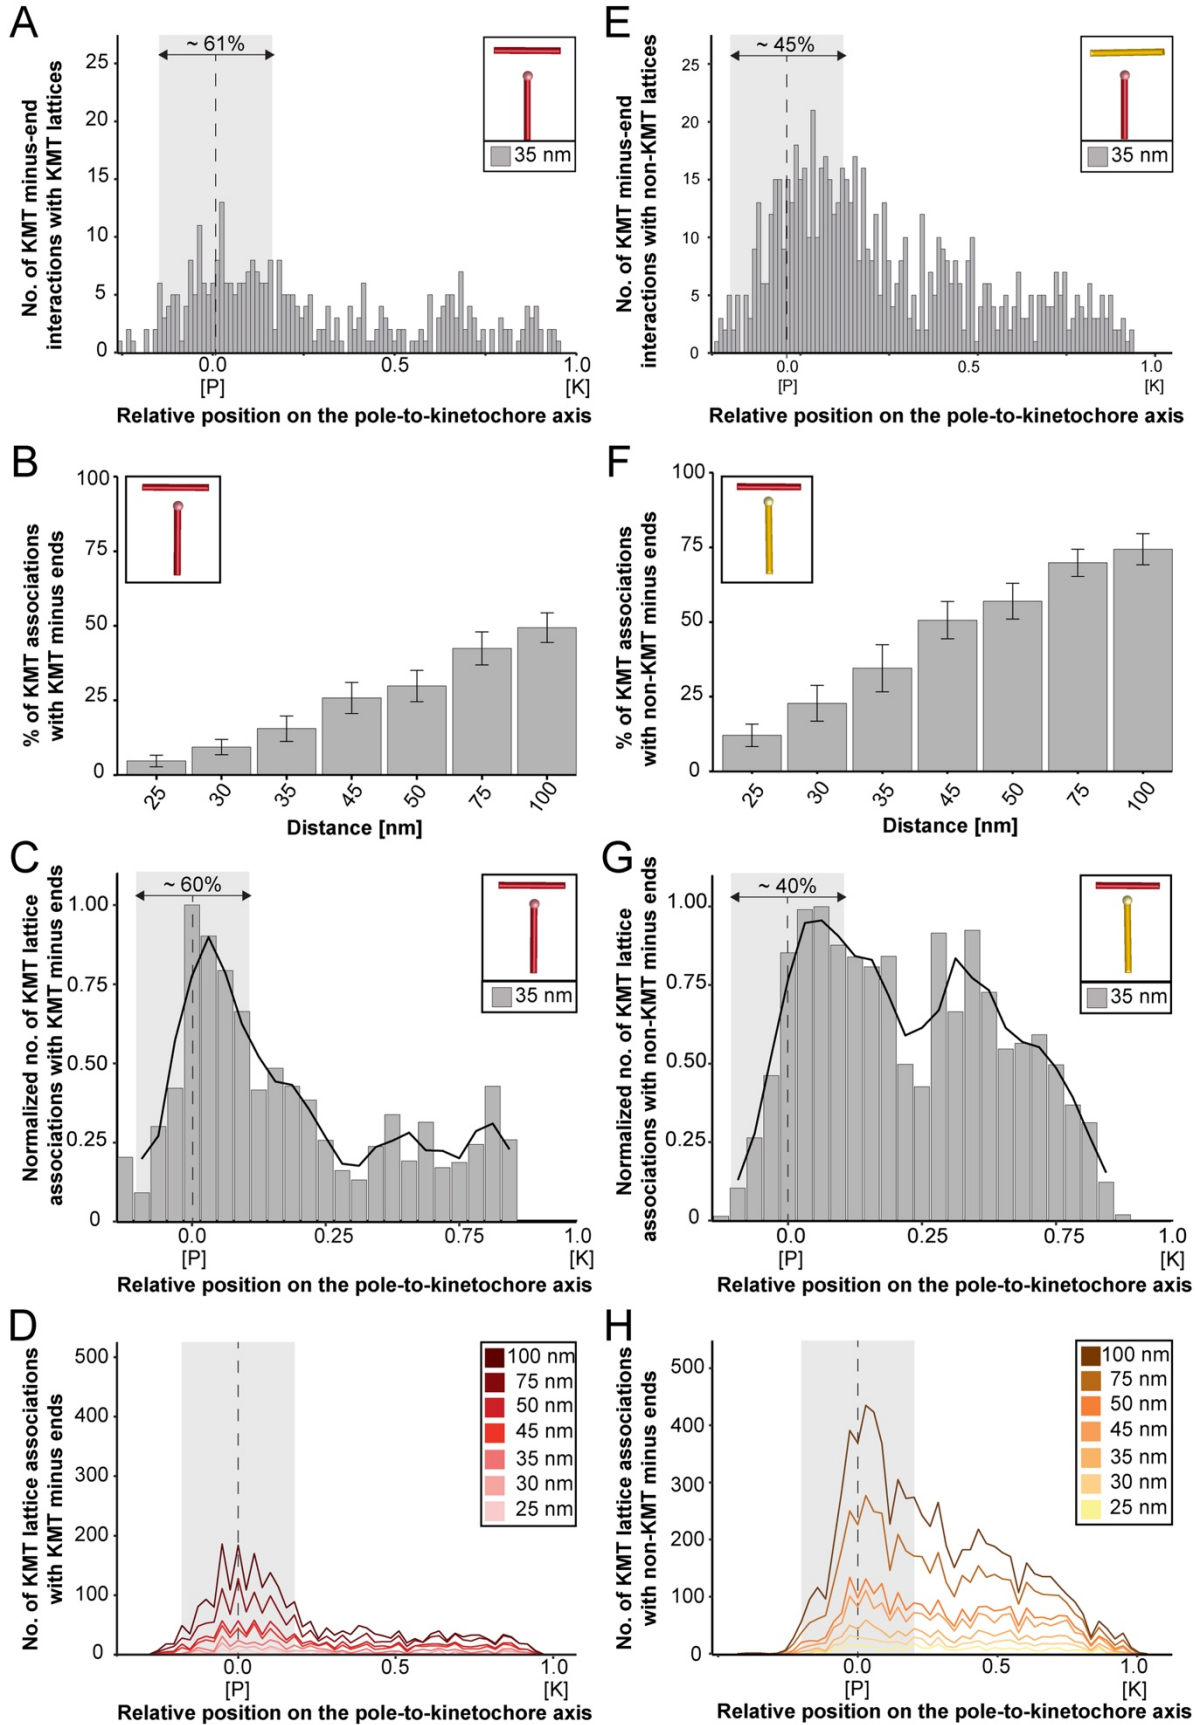

1324 **Figure 8-figure supplement 2. Association of KMT lattices with MT minus ends**

1325 (A) Graph showing the number of KMT minus ends interacting with KMT lattices within 35 nm distance (n  
1326 = 2580). The normalized number of KMT minus ends is plotted against the relative position on the pole-  
1327 to-kinetochore axis (P, pole; K, kinetochore). The percentage of associations at the MT-centrosome  
1328 interaction area is indicated. (B) Bar plot showing the percentage of KMT lattices associated with other  
1329 KMT minus ends depending on defined interaction distances (mean  $\pm$  STD indicated by error bars; n =  
1330 2580). The standard deviations are indicated. (C) Graph showing the number of KMT lattices associated  
1331 with other KMT minus ends plotted along with the relative position on the pole-to-kinetochore axis (P,  
1332 pole; K, kinetochore) and normalized by the spindle density (n = 2580). The distance of MT interaction is  
1333 35 nm. The percentage of KMT associations at the MT-centrosome interaction area is indicated. A  
1334 moving average with a period of 0.05 along the pole-to-kinetochore axis is shown as a black line. (D) Plot  
1335 showing the number of KMT lattices associated with KMT minus ends as shown in C (n = 2580). The plot  
1336 shows the number of associations for distances of 25, 30, 35, 45, 50, 75 and 100 nm. (E) Graph showing  
1337 the number of KMT minus ends interacting with non-KMT lattices within 35 nm distance (n = 2580). The  
1338 normalized number of KMT minus ends is plotted against the relative position on the spindle axis (P, pole;  
1339 K, kinetochore). (F) Bar plot showing the percentage of KMT lattices associated with other non-KMT  
1340 minus ends depending on defined interaction distances (mean  $\pm$  STD indicated by error bars; n = 2580).  
1341 The standard deviations are indicated. (G) Graph showing the number of KMT lattices associated with  
1342 non-KMT minus ends normalized by spindle density and plotted along with the relative position on the  
1343 spindle axis (P, pole; K, kinetochore) (n = 2580). The distance of MT interaction is 35 nm. The percentage  
1344 of KMT association at the MT-centrosome interaction area is indicated. A moving average with a period of  
1345 0.05 along the pole-to-kinetochore axis is shown as a black line. (H) Plot showing the number of KMT  
1346 lattices associated with non-KMT minus ends as shown in G (n = 2580). The plot shows the number of  
1347 associations for distances of 25, 30, 35, 45, 50, 75 and 100 nm.

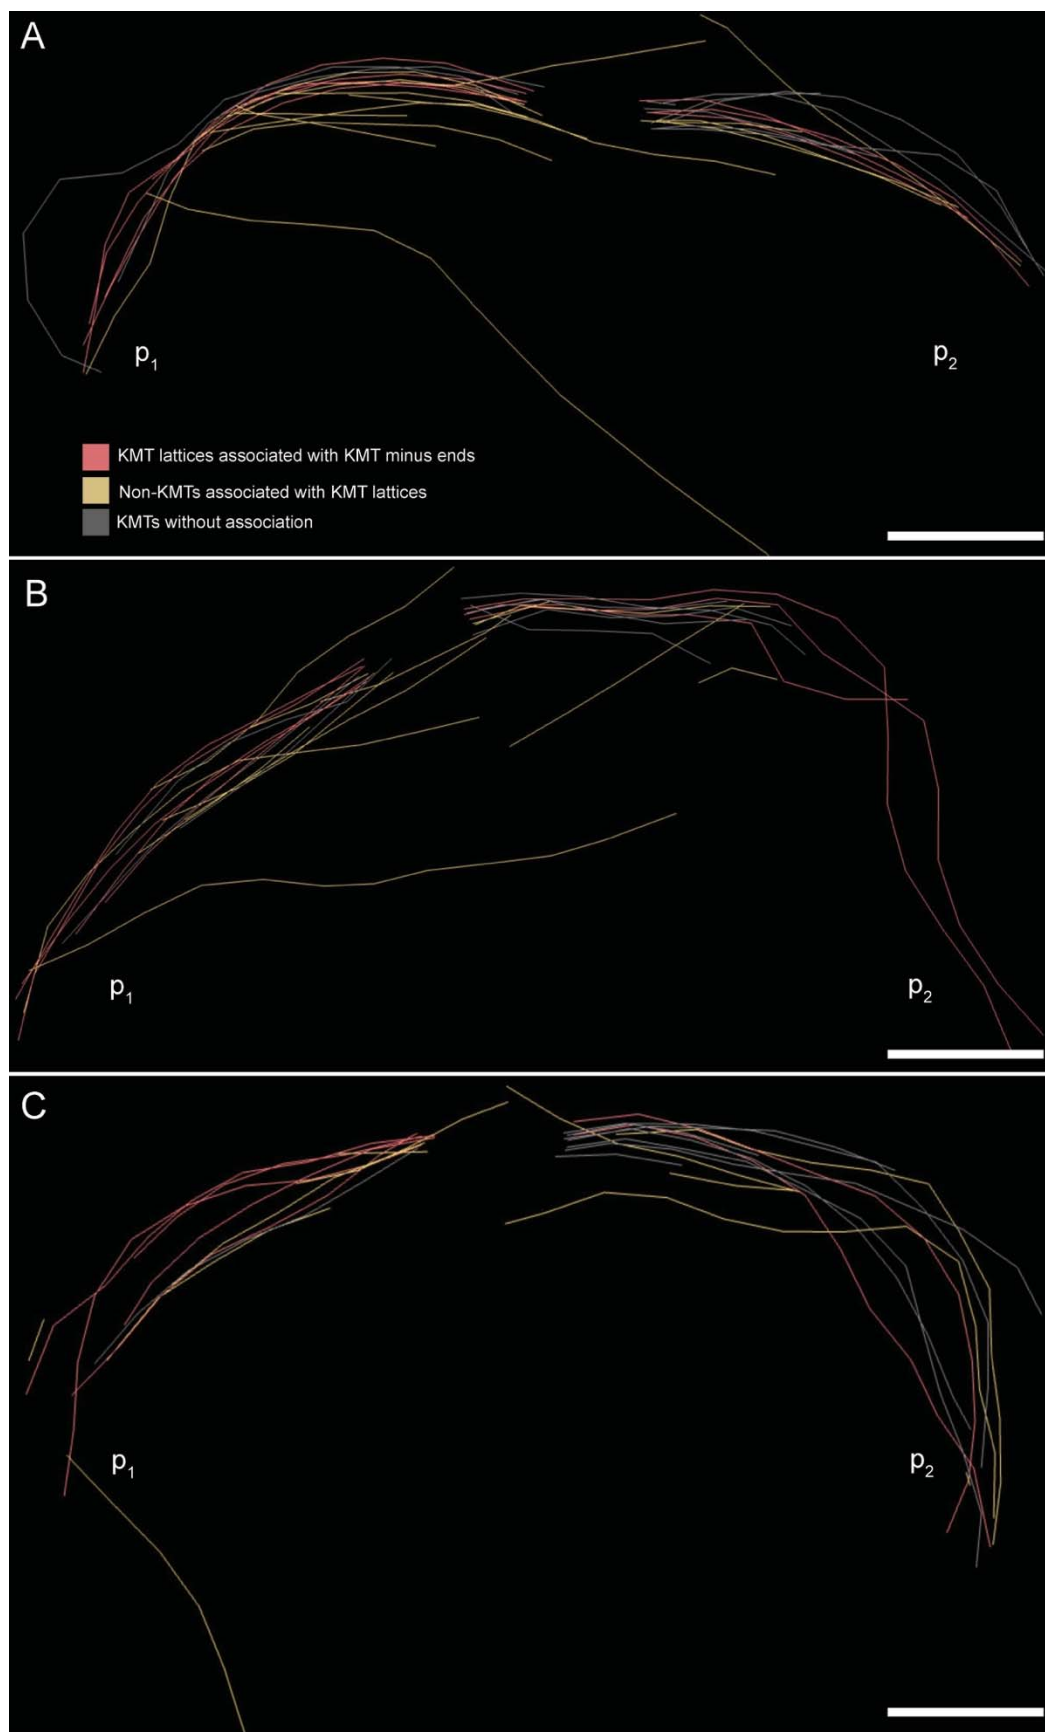

1349 **Figure 8-figure supplement 3. Association of KMT lattices with other MT minus**  
1350 **ends at 35 nm interaction distance**

1351 (A) Visualization of KMTs and non-KMTs obtained from the ASGA 3D-Viewer  
1352 ([https://cfci.shinyapps.io/ASGA\\_3DViewer](https://cfci.shinyapps.io/ASGA_3DViewer)) showing a k-fiber pair from spindle #1 (ASGA k-fiber ID:  
1353 pole1\_08 / pole2\_08). This 3D model illustrates the association of KMT lattices with MT minus ends at an  
1354 association distance of 35 nm. The types of interaction are shown by color-coding. The approximate  
1355 position of the spindle poles ( $p_1$ ,  $p_2$ ) is indicated. (B) Model of k-fiber pair with ID: pole1\_20 / pole2\_20.  
1356 (C) Model of k-fiber pair with ID: pole1\_23 / pole2\_23. Scale bars, 1  $\mu\text{m}$ .

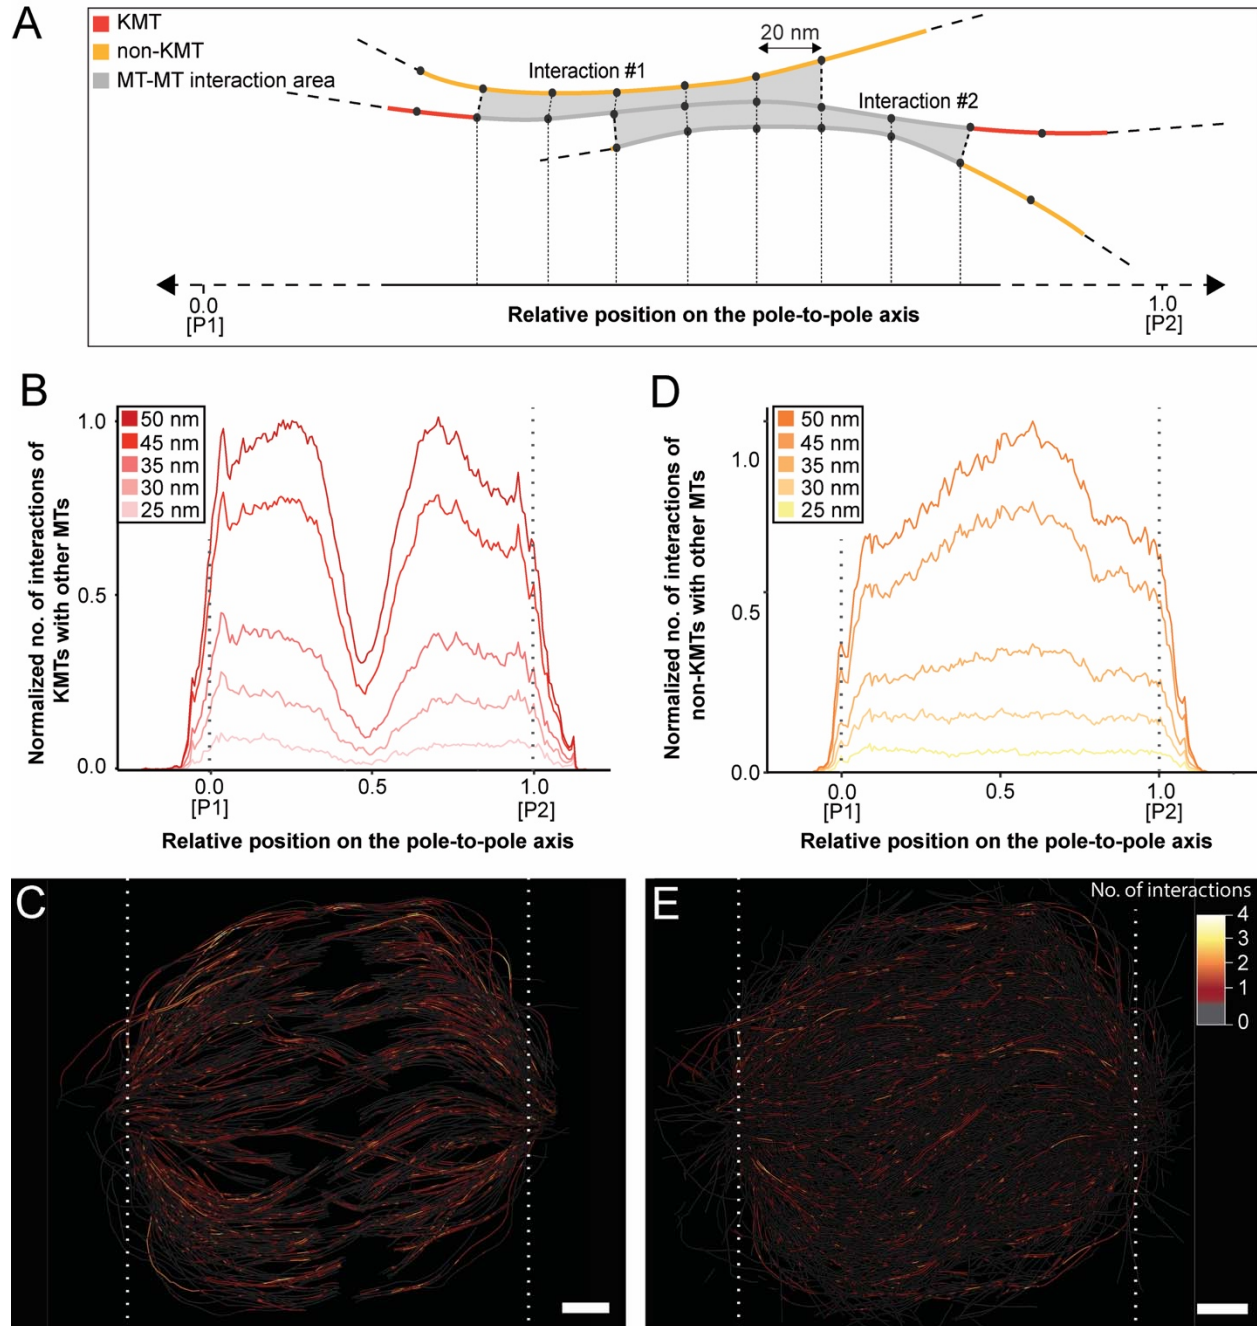

1357

## 1358 **Figure 9. Positions of MT-MT associations**

1359 (A) Schematic illustration of MT-MT associations. The interactions are given in intervals of 20 nm. This  
1360 allows mapping of the number of interactions on the pole-to-pole axis (P1 = position 0, P2 = position 1).  
1361 KMTs are illustrated in red, non-KMTs in yellow, and areas of MT-MT association in gray. (B) Graph  
1362 showing the number of KMTs (normalized against the MT density) associated with other MTs plotted  
1363 against the relative position of the association on a spindle axis. (C) Three-dimensional model of all KMTs  
1364 showing regions of KMT-MT association within 35 nm or closer (n = 2580). Each KMT segment is color-



1365 coded according to the number and position of associations. **(D)** Number of non-KMTs associated with  
1366 neighboring MTs plotted against the relative position of the association on a spindle axis (normalized  
1367 against the MT density). Plots are shown for five different thresholds of MT-MT association distances. **(E)**  
1368 Three-dimensional model of all non-KMTs showing regions of MT-MT association within 35 nm or closer  
1369 distance (n = 9957). White dashed lines indicate the position of the spindle pole. Scale bars, 1  $\mu$ m.

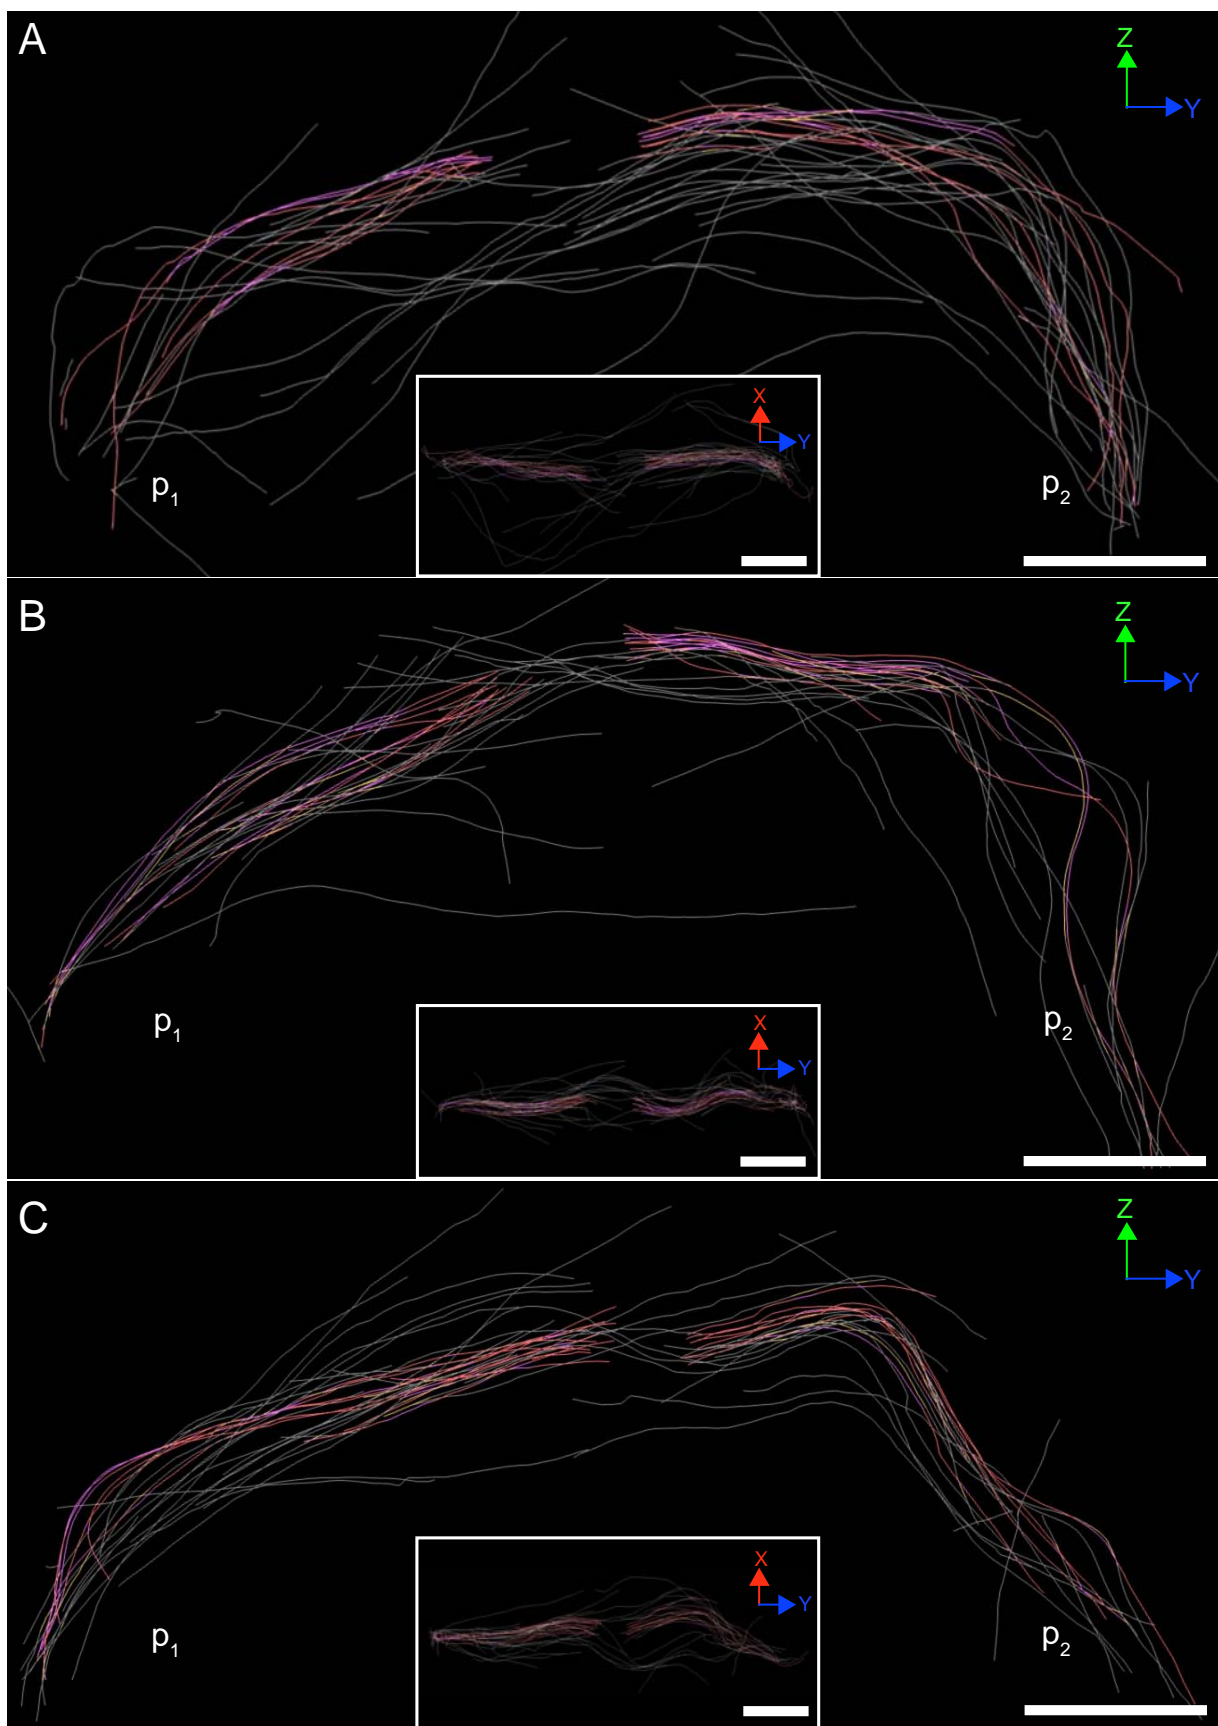

1371 **Figure 9-figure supplement 1. Association of KMT lattices with other MT lattices**  
1372 **at 35 nm association distance**

1373 (A) Visualization of KMTs and non-KMTs obtained from the ASGA 3D-Viewer  
1374 ([https://cfci.shinyapps.io/ASGA\\_3DViewer/](https://cfci.shinyapps.io/ASGA_3DViewer/)) showing a k-fiber pair from spindle #1 (ASGA k-fiber ID:  
1375 pole1\_08). This 3D model illustrates the association of KMT lattices with other KMT lattices minus ends at  
1376 an association distance of 35 nm. The types of interaction are shown by color-coding. The approximate  
1377 position of the spindle poles ( $p_1$ ,  $p_2$ ) is indicated. The k-fiber pair is shown in a Z/Y (large image) and an  
1378 X/Y view (insert). (B) Model of k-fiber pair with ID: pole1\_20. (C) Model of k-fiber pair with ID: pole1\_23.  
1379 Scale bars, 1  $\mu\text{m}$ .

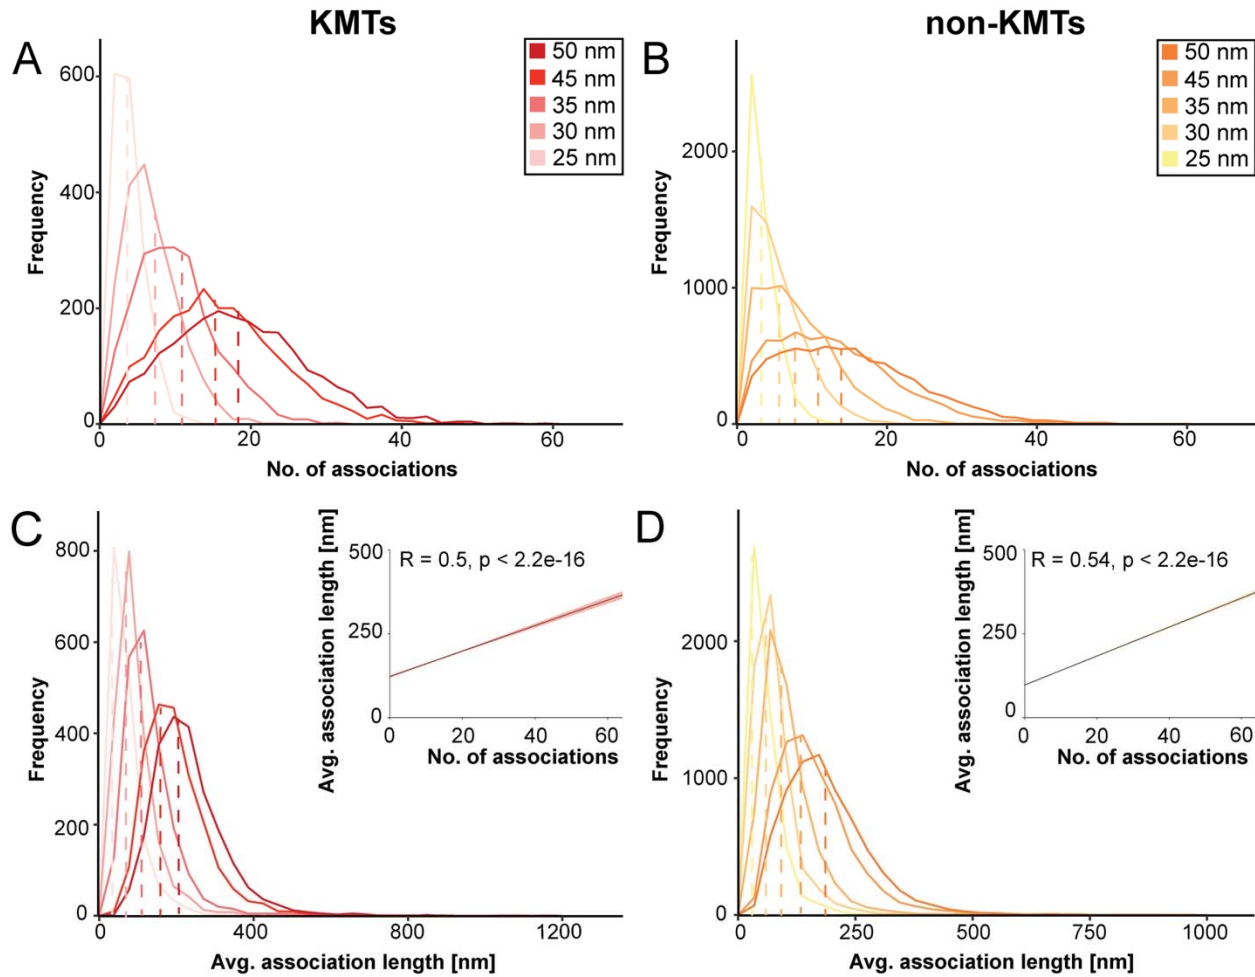

1380

1381 **Figure 9-figure supplement 2. Association of KMT lattices with MT minus ends**

1382 (A) Number of KMTs plotted against the number of associations with other MTs in the spindle per  
1383 individual KMT ( $n = 2580$ ). Plots are shown for five different distances between MT-MT. (B) Number of  
1384 non-KMTs plotted against the number of associations ( $n = 9957$ ). (C) Number of KMTs plotted against the  
1385 average length of MT-MT associations per individual KMT ( $n = 2580$ ). The correlation of the average  
1386 length of interactions with the average number of associations is also given (insert). (D) Number of non-  
1387 KMTs plotted against the average length of MT-MT association per individual non-KMT ( $n = 9957$ ).

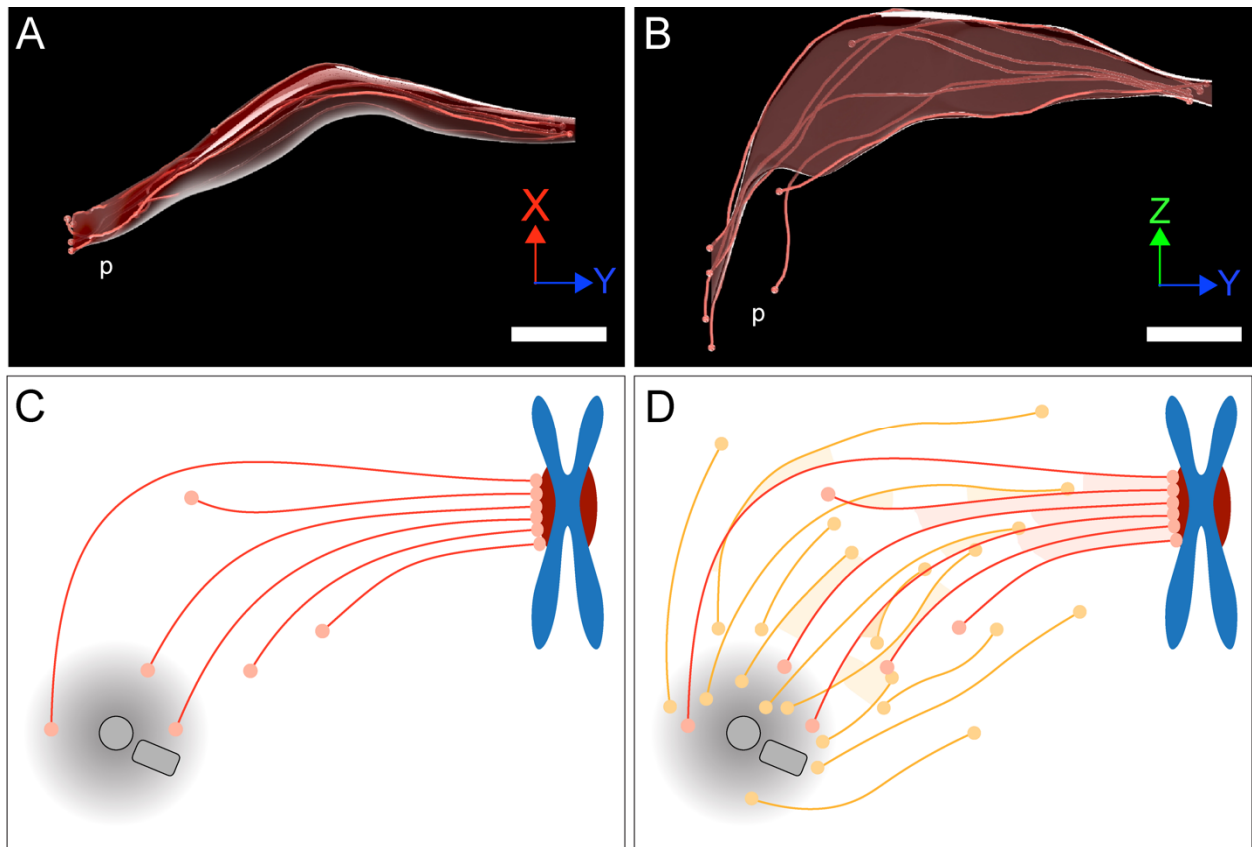

1388

1389 **Figure 10. Model of a k-fiber showing a semi-direct connection between a**  
1390 **kinetochore and spindle poles**

1391 (A-B) Three-dimensional views of a selected 3D-reconstructed k-fiber with an overlay k-fiber area drawn  
1392 around KMTs using the alpha shape method. The KMTs are shown as red lines and the ends are marked  
1393 with red dots. The approximate position of the pole is indicated (p). The same k-fiber is shown from two  
1394 different perspectives (side, X/Y, and top, Z/Y view). Scale bars, 1  $\mu\text{m}$ . (C) Schematic model of a semi-  
1395 direct connection between a kinetochore (chromosome in blue, paired kinetochores in dark red) and a  
1396 spindle pole with centrioles (gray) as established for a single k-fiber. KMTs are shown in red, KMT ends  
1397 as spheres (light red). (D) Schematic model of the k-fiber interaction with a non-KMTs network. Non-  
1398 KMTs are shown in yellow, and non-KMT ends as spheres (yellow). KMT-KMT interactions are indicated  
1399 by light red areas, KMT-non-KMT interactions by light yellow areas.

## 1400 **Videos**

### 1401 **Figure 2-video 1. Generation of a 3D model from joined serial electron tomograms** 1402 **displaying spindle #1**

1403 Series of stitched tomograms and corresponding 3D model of spindle #1. The stacking of serial  
1404 tomograms to increase the tomographic volume is illustrated. MTs are shown as white lines, and  
1405 chromosomes are illustrated in blue. This video corresponds to Figure 2C. Scale bars, 1  $\mu\text{m}$ .

### 1406 **Figure 2-video 2. Generation of a 3D model from joined serial electron tomograms** 1407 **displaying spindle #2**

1408 Series of stitched tomograms and corresponding 3D model of spindle #2. The stacking of serial  
1409 tomograms to increase the tomographic volume is illustrated. MTs are shown as white lines, and  
1410 chromosomes are illustrated in blue. This video corresponds to Figure 2D. Scale bars, 2  $\mu\text{m}$ .

### 1411 **Figure 2-video 3. Generation of a 3D model from joined serial electron tomograms** 1412 **displaying spindle #3**

1413 Series of stitched tomograms and corresponding 3D model of spindle #3. The stacking of serial  
1414 tomograms to increase the tomographic volume is illustrated. MTs are shown as white lines, and  
1415 chromosomes are illustrated in blue. This video corresponds to Figure 2E. Scale bars, 2  $\mu\text{m}$ .

### 1416 **Figure 2-video 4. Organization of KMTs in spindle #1**

1417 Three-dimensional model of spindle #1. Non-KMTs are shown in yellow, and KMTs in red. Chromosomes  
1418 are illustrated in blue and centrioles in gray. This video corresponds to Figure 2F. Scale bars, 1  $\mu\text{m}$ .

### 1419 **Figure 2-video 5. Organization of KMTs in spindle #2**

1420 Three-dimensional model of spindle #2. Non-KMTs are shown in yellow, and KMTs in red. Chromosomes  
1421 are illustrated in blue and centrioles in gray. This video corresponds to Figure 2G. Scale bars, 1.5  $\mu\text{m}$ .

### 1422 **Figure 2-video 6. Organization of KMTs in spindle #3**

1423 Three-dimensional model of spindle #3. Non-KMTs are shown in yellow, and KMTs in red. Chromosomes  
1424 are illustrated in blue and centrioles in gray. This video corresponds to Figure 2H. Scale bars, 1.5  $\mu\text{m}$ .

### 1425 **Figure 3-video 1. 3D reconstruction of a single k-fiber pair**

1426 Three-dimensional model of selected sister k-fibers in spindle #1. The KMTs are shown in red, the KMT  
1427 ends with white spheres and the centrioles in gray. This video corresponds to Figure 3A (k-fiber pair # 1).  
1428 Scale bars, 1  $\mu\text{m}$ .



1429 **Figure 3-video 2. 3D reconstruction of a single k-fiber pair**

1430 Three-dimensional model of selected sister k-fibers in spindle #1. The KMTs are shown in red, the KMT  
1431 ends with white spheres and the centrioles in gray. This video corresponds to Figure 3A (k-fiber pair # II).  
1432 Scale bars, 1  $\mu\text{m}$ .

1433 **Figure 3-video 3. 3D reconstruction of a single k-fiber pair**

1434 Three-dimensional model of selected sister k-fibers in spindle #1. The KMTs are shown in red, the KMT  
1435 ends with white spheres and the centrioles in gray. This video corresponds to Figure 3A (k-fiber pair # III).  
1436 Scale bars, 1  $\mu\text{m}$ .

1437 **Figure 3-video 4. 3D reconstruction of a single k-fiber pair**

1438 Three-dimensional model of selected sister k-fibers in spindle #1. The KMTs are shown in red, the KMT  
1439 ends with white spheres and the centrioles in gray. This video corresponds to Figure 3A (k-fiber pair # IV).  
1440 Scale bars, 1  $\mu\text{m}$ .

1441 **Figure 3-video 5. 3D reconstruction of a single k-fiber pair**

1442 Three-dimensional model of selected sister k-fibers in spindle #1. The KMTs are shown in red, the KMT  
1443 end with white spheres, and the centrioles in gray. This video corresponds to Figure 3A (k-fiber pair # V).  
1444 Scale bars, 1  $\mu\text{m}$ .

1445 **Figure 3-video 6. 3D reconstruction of a single k-fiber pair**

1446 Three-dimensional model of selected sister k-fibers in spindle #1. The KMTs are shown in red, the KMT  
1447 ends with white spheres and the centrioles in gray. This video corresponds to Figure 3A (k-fiber pair # VI).  
1448 Scale bars, 1  $\mu\text{m}$ .

1449 **Figure 6-video 1. Analysis of k-fiber global tortuosity in spindle #1**

1450 Three-dimensional model of all KMTs of spindle #1 with indicated global tortuosity. KMTs are color-coded  
1451 as indicated in Figure 6D. KMT ends are shown as white spheres, centrioles in gray. This video  
1452 corresponds to Figure 5C. Scale bars, 1  $\mu\text{m}$ .

1453 **Figure 6-video 2. Analysis of k-fiber global tortuosity in spindle #2**

1454 Three-dimensional model of all KMTs of spindle #2 with indicated global tortuosity. KMTs are color-coded  
1455 as indicated in Figure 6D. KMT ends are shown as white spheres, centrioles in gray. This video  
1456 corresponds to Figure 6D (example of spindle #2 shown as a movie only). Scale bars, 1  $\mu\text{m}$ .

1457 **Figure 6-video 3. Analysis of k-fiber global tortuosity in spindle #3**

1458 Three-dimensional model of all KMTs of spindle #3 with indicated global tortuosity. KMTs are color-coded  
1459 as indicated in Figure 6D. KMT ends are shown as white spheres, centrioles in gray. This video  
1460 corresponds to Figure 6D (example of spindle #3 shown as a movie only). Scale bars, 1  $\mu\text{m}$ .

1461 **Figure 8-video 1. Associations of KMT minus ends with MT lattices in spindle #1**

1462 Three-dimensional model of all KMTs from spindle #1. KMT minus ends interacting with other MTs at  
1463 association distances up to 35 nm are shown. KMT minus ends interacting with either KMT (red lines) or  
1464 non-KMT lattices (yellow lines) are illustrated. KMTs without any interactions are shown in gray. This  
1465 video corresponds to Figure 8C. Scale bars, 1  $\mu\text{m}$ .

1466 **Figure 8-video 2. Association of KMT minus end with MT lattices**

1467 Three-dimensional model of KMTs from spindle #1 (ASGA k-fiber ID: pole1\_08). KMT minus-end  
1468 interaction with other MTs at an association distance of 35 nm KMT minus ends interacting with either  
1469 KMTs (purple lines) or non-KMT lattices (yellow lines) is indicated. KMTs without any interactions are  
1470 shown in gray. This video corresponds to Figure 8-figure supplement 1A. Scale bars, 1  $\mu\text{m}$ .

1471 **Figure 9-video 1. Associations of KMT lattices with other MTs**

1472 Three-dimensional model of all KMTs in spindle #1. KMT lattices interacting with other MT lattices at  
1473 association distances of up to 35 nm are shown. KMTs are shown as gray lines with color-coded regions  
1474 showing the number of MT-MT associations. This video corresponds to Figure 9C. Scale bars, 1  $\mu\text{m}$ .

1475 **Figure 9-video 2. Associations of non-KMTs with other MTs**

1476 Three-dimensional model of all non-KMTs in spindle #1. Non-KMT lattices interacting with other MT  
1477 lattices at association distances up to 35 nm are shown. Non-KMTs are shown as gray lines with color-  
1478 coded regions showing the number of MT-MT associations. This video corresponds to Figure 9E. Scale  
1479 bars, 1  $\mu\text{m}$ .

1480 **Tables**

1481 **Table 1. Characterization of the 3D-reconstructed metaphase spindles in HeLa**  
1482 **cell**

| Data set          | Spindle pole distance [ $\mu\text{m}$ ] | Inter-kinetochore distance [ $\mu\text{m}$ ] | No. of MTs in tomographic volume | No. of kinetochores | No. of KMTs     | No. of non-KMTs | No. of k-fibers |
|-------------------|-----------------------------------------|----------------------------------------------|----------------------------------|---------------------|-----------------|-----------------|-----------------|
| <b>Spindle #1</b> | 7.16                                    | $1.08 \pm 0.20$<br>(n=43)                    | 4884                             | 92                  | 797<br>(16.3%)  | 4087<br>(83.7%) | 92              |
| <b>Spindle #2</b> | 10.39                                   | $1.24 \pm 0.21$<br>(n=50)                    | 8047                             | 110                 | 1102<br>(13.7%) | 6945<br>(86.3%) | 110             |
| <b>Spindle #3</b> | 9.48                                    | $1.03 \pm 0.27$<br>(n=40)                    | 5904                             | 90                  | 680<br>(11.5%)  | 5224<br>(88.5%) | 90              |

1483

1484 **Table 2. Quantitative analysis of KMTs and non-KMTs**

| <b>Data set</b>   | <b>Length of KMTs [μm]</b> | <b>Length of non-KMTs [μm]</b> | <b>No. of KMTs per kinetochore</b> | <b>No. of KMTs at MT-centrosome interaction area</b> | <b>Mean KMT minus-end distance to poles [μm]</b> | <b>% of KMTs associated with poles</b> | <b>% of non-KMTs associated with poles</b> |
|-------------------|----------------------------|--------------------------------|------------------------------------|------------------------------------------------------|--------------------------------------------------|----------------------------------------|--------------------------------------------|
| <b>Spindle #1</b> | 3.59<br>(±1.57)            | 2.13<br>(±1.67)                | 8.04<br>(±1.86)                    | 5.0<br>(±1.8)                                        | 1.72                                             | 61.2                                   | 44.3                                       |
| <b>Spindle #2</b> | 3.82<br>(±1.97)            | 1.95<br>(±1.60)                | 9.75<br>(±2.18)                    | 3.1<br>(±2.3)                                        | 2.87                                             | 31.5                                   | 28.6                                       |
| <b>Spindle #3</b> | 4.27<br>(±1.93)            | 2.07<br>(±1.93)                | 7.49<br>(±1.91)                    | 4.1<br>(±2.0)                                        | 2.12                                             | 54.2                                   | 41.9                                       |

1485

1486 **Table 3. Quantitative analysis of the k-fiber organization**

| Data set   | KMT density at the kinetochore [KMT/ $\mu\text{m}^2$ ] | KMT-KMT distance at the kinetochore [nm] | Global tortuosity of KMTs | % of curved KMTs | Area of k-fibers [ $\mu\text{m}^2$ ] | % of KMTs in a k-fibers |
|------------|--------------------------------------------------------|------------------------------------------|---------------------------|------------------|--------------------------------------|-------------------------|
| Spindle #1 | 122<br>( $\pm 62$ )                                    | 67<br>( $\pm 20$ )                       | 1.11<br>( $\pm 0.11$ )    | 39.8             | 0.08<br>( $\pm 0.1$ )                | 64<br>( $\pm 27$ )      |
| Spindle #2 | 99<br>( $\pm 45$ )                                     | 78<br>( $\pm 23$ )                       | 1.07<br>( $\pm 0.07$ )    | 28.4             | 0.09<br>( $\pm 0.11$ )               | 70<br>( $\pm 25$ )      |
| Spindle #3 | 117<br>( $\pm 72$ )                                    | 76<br>( $\pm 23$ )                       | 1.13<br>( $\pm 0.13$ )    | 47.1             | 0.12<br>( $\pm 0.24$ )               | 59<br>( $\pm 29$ )      |

1487

1488 **Table 4. Quantitative analysis of k-fiber positioning in the spindle**

| Region       | Length of KMTs [ $\mu\text{m}$ ] | No. of KMTs per kinetochore | No. of KMTs at MT-centrosome interaction area | Mean KMT minus-end distance to poles [ $\mu\text{m}$ ] | No. of KMTs associated with poles | Global tortuosity of KMTs |
|--------------|----------------------------------|-----------------------------|-----------------------------------------------|--------------------------------------------------------|-----------------------------------|---------------------------|
| Central      | 3.5<br>( $\pm 1.7$ )             | 8.2<br>( $\pm 2.4$ )        | 162<br>(~48%)                                 | 2.0<br>( $\pm 1.3$ )                                   | 4.3<br>( $\pm 2.3$ )              | 1.08<br>( $\pm 0.08$ )    |
| Intermediate | 3.6<br>( $\pm 1.7$ )             | 8.6<br>( $\pm 2.1$ )        | 266<br>(~49%)                                 | 2.1<br>( $\pm 1.3$ )                                   | 4.6<br>( $\pm 1.9$ )              | 1.11<br>( $\pm 0.12$ )    |
| Peripheral   | 3.9<br>( $\pm 2.0$ )             | 8.6<br>( $\pm 2.4$ )        | 730<br>(~45%)                                 | 2.5<br>( $\pm 1.6$ )                                   | 4.1<br>( $\pm 2.0$ )              | 1.10<br>( $\pm 0.10$ )    |

1489



1490 **Table 5. Analysis of the potential association of KMT minus ends with other**  
 1491 **neighboring KMT lattices**

| Data set   | Analysis    | Association distances [nm] |     |      |      |      |      |      |
|------------|-------------|----------------------------|-----|------|------|------|------|------|
|            |             | 25                         | 30  | 35   | 45   | 50   | 75   | 100  |
| Spindle #1 | No. of KMTs | 37                         | 68  | 112  | 204  | 238  | 306  | 330  |
|            | % of KMTs   | 4.9                        | 9.1 | 15.0 | 27.3 | 32.0 | 40.9 | 44.1 |
| Spindle #2 | No. of KMTs | 20                         | 37  | 68   | 142  | 177  | 266  | 290  |
|            | % of KMTs   | 1.9                        | 3.5 | 6.3  | 13.2 | 16.5 | 24.8 | 27.1 |
| Spindle #3 | No. of KMTs | 13                         | 27  | 66   | 116  | 135  | 199  | 218  |
|            | % of KMTs   | 1.9                        | 4.0 | 9.8  | 17.2 | 20.0 | 29.5 | 32.3 |

1492

1493 **Table 6. Analysis of the potential associations of KMT minus ends with**  
 1494 **neighboring non-KMT lattices**

| Data set   | Analysis    | Association distances [nm] |      |        |        |      |      |      |
|------------|-------------|----------------------------|------|--------|--------|------|------|------|
|            |             | 25                         | 30   | 35     | 45     | 50   | 75   | 100  |
| Spindle #1 | No. of KMTs | 37                         | 82   | 132    | 217    | 248  | 353  | 384  |
|            | % of KMTs   | 4.9                        | 11.0 | 17.6.0 | 29.0.6 | 33.2 | 47.2 | 51.3 |
| Spindle #2 | No. of KMTs | 245                        | 313  | 353    | 469    | 5258 | 677  | 732  |
|            | % of KMTs   | 22.9                       | 29.2 | 33.0   | 43.8   | 49.0 | 63.2 | 68.3 |
| Spindle #3 | No. of KMTs | 28                         | 64   | 107    | 198    | 230  | 355  | 410  |
|            | % of KMTs   | 4.2                        | 9.5  | 15.9   | 29.4   | 34.1 | 52.7 | 60.8 |

1495

1496 **Table 7. Analysis of the potential association of KMT lattices with other**  
 1497 **neighboring KMT minus ends**

1498

| Data set          | No. and % of KMT with KMT associations according to the given association distances [nm] |             |              |              |              |              |              |
|-------------------|------------------------------------------------------------------------------------------|-------------|--------------|--------------|--------------|--------------|--------------|
|                   | 25                                                                                       | 30          | 35           | 45           | 50           | 75           | 100          |
| <b>Spindle #1</b> | 39<br>[5%]                                                                               | 71<br>[10%] | 117<br>[15%] | 210<br>[28%] | 236<br>[31%] | 336<br>[45%] | 403<br>[54%] |
| <b>Spindle #2</b> | 24<br>[2%]                                                                               | 46<br>[4%]  | 86<br>[8%]   | 179<br>[17%] | 237<br>[22%] | 401<br>[37%] | 470<br>[43%] |
| <b>Spindle #3</b> | 14<br>[2%]                                                                               | 27<br>4%]   | 61<br>[9%]   | 127<br>[19%] | 148<br>[22%] | 227<br>[34%] | 284<br>[42%] |

1499

1500 **Table 8. Analysis of the potential association of KMT lattices with other**  
 1501 **neighboring non-KMT minus ends**

| Data set          | No. and % of KMT with non-KMT associations according to the given association distances [nm] |              |              |              |              |              |              |
|-------------------|----------------------------------------------------------------------------------------------|--------------|--------------|--------------|--------------|--------------|--------------|
|                   | 25                                                                                           | 30           | 35           | 45           | 50           | 75           | 100          |
| <b>Spindle #1</b> | 81<br>(11%)                                                                                  | 151<br>(20%) | 223<br>(30%) | 362<br>(48%) | 415<br>(55%) | 534<br>(71%) | 577<br>(77%) |
| <b>Spindle #2</b> | 51<br>(5%)                                                                                   | 100<br>(9%)  | 173<br>(16%) | 351<br>(33%) | 433<br>(40%) | 640<br>(59%) | 717<br>(67%) |
| <b>Spindle #3</b> | 34<br>(5%)                                                                                   | 93<br>(14%)  | 176<br>(26%) | 301<br>(44%) | 348<br>(51%) | 471<br>(69%) | 507<br>(75%) |

1502

1503 **Table 9. Average number of associations with MT lattices**

| Data set   | MT type  | No. of associations according to the given MT-MT distances [nm] |                |                 |                 |                 |
|------------|----------|-----------------------------------------------------------------|----------------|-----------------|-----------------|-----------------|
|            |          | 25                                                              | 30             | 35              | 45              | 50              |
| Spindle #1 | KMTs     | 4.8<br>(± 1.5)                                                  | 8.6<br>(± 2.5) | 12.4<br>(± 3.4) | 18.8<br>(± 4.9) | 1.3<br>(± 5.5)  |
|            | Non-KMTs | 4.4<br>(± 1.5)                                                  | 7.0<br>(± 2.6) | 9.6<br>(± 3.7)  | 13.0<br>(± 5.4) | 16.2<br>(± 6.2) |
| Spindle #2 | KMTs     | 4.2<br>(± 1.3)                                                  | 5.8<br>(± 1.8) | 8.0<br>(± 2.6)  | 13.3<br>(± 4.1) | 16.0<br>(± 4.8) |
|            | Non-KMTs | 3.2<br>(± 0.9)                                                  | 4.0<br>(± 1.3) | 5.2<br>(± 1.8)  | 8.2<br>(± 3.1)  | 9.8<br>(± 3.7)  |
| Spindle #3 | KMTs     | 4.2<br>(± 1.2)                                                  | 8.0<br>(± 2.3) | 12.4<br>(± 3.4) | 18.6<br>(± 4.8) | 21.2<br>(± 5.4) |
|            | Non-KMTs | 3.6<br>(± 1.2)                                                  | 5.2<br>(± 2.3) | 8.0<br>(± 3.3)  | 11.6<br>(± 4.7) | 13.2<br>(± 5.3) |
| Average    | KMTs     | 4.4<br>(± 1.3)                                                  | 7.4<br>(± 2.3) | 10.6<br>(± 3.2) | 16.4<br>(± 4.7) | 19.0<br>(± 5.3) |
|            | Non-KMTs | 3.6<br>(± 1.2)                                                  | 5.4<br>(± 2.2) | 7.4<br>(± 3.1)  | 10.8<br>(± 4.5) | 12.4<br>(± 5.1) |

1504

1505 **Table 10. Average length of associations with MT lattices**

| Data set   | MT type  | Length of associations according to the given MT-MT distances [nm] |                    |                    |                    |                    |
|------------|----------|--------------------------------------------------------------------|--------------------|--------------------|--------------------|--------------------|
|            |          | 25                                                                 | 30                 | 35                 | 45                 | 50                 |
| Spindle #1 | KMTs     | 81.3<br>(± 88.8)                                                   | 119.7<br>(± 151.1) | 163.9<br>(± 207.5) | 241.3<br>(± 301.9) | 271.0<br>(± 335.9) |
|            | Non-KMTs | 58.3<br>(± 54.1)                                                   | 78.3<br>(± 79.9)   | 107.7<br>(± 116.9) | 165.1<br>(± 195.1) | 187.9<br>(± 227.0) |
| Spindle #2 | KMTs     | 69.5<br>(± 69.9)                                                   | 93.2<br>(± 107.0)  | 124.3<br>(± 146.0) | 207.8<br>(± 252.3) | 252.2<br>(± 314.9) |
|            | Non-KMTs | 59.2<br>(± 53.2)                                                   | 73.2<br>(± 71.9)   | 92.3<br>(± 97.3)   | 145.8<br>(± 170.5) | 175.1<br>(± 213.0) |
| Spindle #3 | KMTs     | 66.1<br>(± 63.4)                                                   | 97.3<br>(± 117.8)  | 143.2<br>(± 191.7) | 231.3<br>(± 321.2) | 263.4<br>(± 362.2) |
|            | Non-KMTs | 54.3<br>(± 51.7)                                                   | 74.5<br>(± 86.4)   | 104.6<br>(± 133.7) | 165.6<br>(± 218.7) | 191.3<br>(± 252.0) |
| Average    | KMTs     | 73.0<br>(± 76.2)                                                   | 104.6<br>(± 129.2) | 145.1<br>(± 186.0) | 225.6<br>(± 292.3) | 261.9<br>(± 336.8) |
|            | Non-KMTs | 57.2<br>(± 53.1)                                                   | 75.4<br>(± 80.5)   | 102.2<br>(± 118.9) | 159.1<br>(± 197.2) | 184.9<br>(± 232.1) |

1506



1507

1508 **Table 11. Tomographic data sets as used throughout this study**

| <b>Data set</b>   | <b>Original data set</b> | <b>Montage (X/Y)</b> | <b>No. of serial sections [300 nm each]</b> | <b>Estimated tomographic volume [<math>\mu\text{m}^3</math>]</b> | <b>Data set size [Gb]</b> |
|-------------------|--------------------------|----------------------|---------------------------------------------|------------------------------------------------------------------|---------------------------|
| <b>Spindle #1</b> | T_0475                   | 2x3                  | 22                                          | 598                                                              | 46.5                      |
| <b>Spindle #2</b> | T_0479                   | 2x3                  | 29                                          | 996                                                              | 77.9                      |
| <b>Spindle #3</b> | T_0494                   | 2x3                  | 35                                          | 904                                                              | 71.9                      |

1509

1510 **Table 12. Quantification of KMT structure before and after application of Z-**  
 1511 **expansion to the 3D models**

| Data set          | Length of KMTs [μm] |                 | Length of non-KMTs [μm] |                 | No. of KMTs per kinetochore |                 | No. of KMTs at MT-centrosome interaction area |               | Mean KMT minus-end distance to poles [μm] |       | No. of KMTs associated with poles [%] |       | No. of non-KMTs associated with poles [%] |       |
|-------------------|---------------------|-----------------|-------------------------|-----------------|-----------------------------|-----------------|-----------------------------------------------|---------------|-------------------------------------------|-------|---------------------------------------|-------|-------------------------------------------|-------|
|                   | Before              | After           | Before                  | After           | Before                      | After           | Before                                        | After         | Before                                    | After | Before                                | After | Before                                    | After |
| <b>Spindle #1</b> | 3.23<br>(±1.49)     | 3.59<br>(±1.57) | 2.03<br>(±1.6)          | 2.13<br>(±1.67) | 8.04<br>(±1.86)             | 8.04<br>(±1.86) | 4.1<br>(±1.8)                                 | 5.0<br>(±1.8) | 1.16                                      | 1.72  | 62.2                                  | 61.2  | 44.5                                      | 44.3  |
| <b>Spindle #2</b> | 3.69<br>(±1.87)     | 3.82<br>(±1.97) | 1.85<br>(±1.55)         | 1.95<br>(±1.60) | 9.75<br>(±2.18)             | 9.75<br>(±2.18) | 2.4<br>(±2.0)                                 | 3.1<br>(±2.3) | 2.47                                      | 2.87  | 53.6                                  | 31.5  | 28.8                                      | 28.6  |
| <b>Spindle #3</b> | 4.03<br>(±1.79)     | 4.27<br>(±1.93) | 1.91<br>(±1.80)         | 2.07<br>(±1.93) | 7.49<br>(±1.91)             | 7.49<br>(±1.91) | 3.4<br>(±1.8)                                 | 4.1<br>(±2.0) | 1.35                                      | 2.12  | 62.0                                  | 54.2  | 42.3                                      | 41.9  |

1512

1513 **Table 13. Quantification of the k-fiber organization before and after application of**  
 1514 **Z-expansion to the 3D models**

| Data set          | Density of KMTs at the kinetochore [KMT/ $\mu\text{m}^2$ ] |                     | KMT-KMT distance at the kinetochore [nm] |                    | Global tortuosity of KMTs |                        | % of curved KMTs |       | Area of k-fibers [ $\mu\text{m}^2$ ] |                        | % of KMTs in a k-fibers |                    |
|-------------------|------------------------------------------------------------|---------------------|------------------------------------------|--------------------|---------------------------|------------------------|------------------|-------|--------------------------------------|------------------------|-------------------------|--------------------|
|                   | Before                                                     | After               | Before                                   | After              | Before                    | After                  | Before           | After | Before                               | After                  | Before                  | After              |
| <b>Spindle #1</b> | 151<br>( $\pm 74$ )                                        | 122<br>( $\pm 62$ ) | 61<br>( $\pm 11$ )                       | 67<br>( $\pm 20$ ) | 1.09<br>( $\pm 0.10$ )    | 1.11<br>( $\pm 0.11$ ) | 36.1             | 39.8  | 0.063<br>( $\pm 0.09$ )              | 0.08<br>( $\pm 0.1$ )  | 34<br>( $\pm 27$ )      | 64<br>( $\pm 27$ ) |
| <b>Spindle #2</b> | 137<br>( $\pm 68$ )                                        | 99<br>( $\pm 45$ )  | 65<br>( $\pm 12$ )                       | 78<br>( $\pm 23$ ) | 1.06<br>( $\pm 0.06$ )    | 1.07<br>( $\pm 0.07$ ) | 21.4             | 28.4  | 0.068<br>( $\pm 0.10$ )              | 0.09<br>( $\pm 0.11$ ) | 70<br>( $\pm 25$ )      | 70<br>( $\pm 25$ ) |
| <b>Spindle #3</b> | 175<br>( $\pm 123$ )                                       | 117<br>( $\pm 72$ ) | 66<br>( $\pm 12$ )                       | 76<br>( $\pm 23$ ) | 1.11<br>( $\pm 0.11$ )    | 1.13<br>( $\pm 0.13$ ) | 39.5             | 47.1  | 0.080<br>( $\pm 0.15$ )              | 0.12<br>( $\pm 0.24$ ) | 59<br>( $\pm 39$ )      | 59<br>( $\pm 29$ ) |

1515
